1  
2  
3  
4  
5  
6  
7  
8  
9  
10  
11  
12  
13  
14  
15  
16  
17  
18  
19  
20  
21  
22  
23

TGF $\beta$  signaling is required for sclerotome resegmentation during development of the spinal  
column in *Gallus gallus*

-

Sade W. Clayton, Ronisha McCardell, and Rosa Serra#

# Correspondence to:

Rosa Serra, Ph.D.

Department of Cell Developmental and Integrative Biology

University of Alabama at Birmingham

390 MCLM, 1918 University Blvd.

Birmingham, Al 35294-0005

205-934-0842

[rserra@uab.edu](mailto:rserra@uab.edu)

key words: TGF $\beta$ , resegmentation, somites, axial skeleton, myocyte

24 ABSTRACT

25 We previously showed the importance of TGF $\beta$  signaling in development of the mouse axial  
26 skeleton. Here, we provide the first direct evidence that TGF $\beta$  signaling is required for  
27 resegmentation of the sclerotome using chick embryos. Lipophilic fluorescent tracers, DiO and  
28 DiD, were microinjected into adjacent somites of embryos treated with or without TGF $\beta$ R1  
29 inhibitor, SB431542, at developmental day E2.5 (HH16). Lineage tracing of labeled cells was  
30 observed over the course of 4 days until the completion of resegmentation at E6.5 (HH32).  
31 Vertebrae were malformed and intervertebral discs were small and misshapen in SB431542  
32 injected embryos. Inhibition of TGF $\beta$  signaling resulted in alterations in resegmentation that  
33 ranged between full, partial, and slanted shifts in distribution of DiO or DiD labeled cells within  
34 vertebrae. Patterning of rostro- caudal markers within sclerotome was disrupted at E3.5 after  
35 treatment with SB431542 with rostral domains expressing both rostral and caudal markers.  
36 Hypaxial myofibers were also increased in thickness after treatment with the inhibitor. We  
37 propose that TGF $\beta$  signaling regulates rostro-caudal polarity and subsequent resegmentation in  
38 sclerotome during spinal column development.

39

40

41

42

43

44

45

46

47 INTRODUCTION

48 Spinal column formation is a dynamic process that requires migration and subsequent  
49 differentiation of mesenchymal sclerotome cells into the vertebrae (VB), cartilaginous end  
50 plates, ribs, annulus fibrosus (AF) of the intervertebral discs (IVD), and tendons and ligaments of  
51 the spine (Christ et al., 2007, Alkhatib et al., 2018, Williams et al., 2019, Cox and Serra, 2014).  
52 This process begins with the formation of somites that will differentiate into dermomyotome and  
53 sclerotome, depending on the signals emanating from neighboring tissues (Kalcheim and Ben-  
54 Yair, 2005, Christ and Ordahl, 1995). These signals include Wnt1/3 from the epidermis and  
55 BMP4 from the lateral plate mesoderm causing differentiation of the dermomyotome from the  
56 lateral dorsal region of the somite while Shh and Noggin secreted from the notochord and floor  
57 plate of the neural tube stimulate sclerotome formation ventrally (Fan et al., 1997, Fan and  
58 Tessier-Lavigne, 1994, Marcelle et al., 1997).

59 Sclerotome is initially organized along the anterior-posterior axis of the embryo into a  
60 metameric pattern of rostro-caudal domains separated by von Ebner's fissure (Christ et al., 2000,  
61 Von Ebner, 1888). The discrete rostral and caudal domains within each segment expresses  
62 distinct markers such as Tbx18, Mesp2, and Tenascin rostrally and Unxc4.1, Ripply 1/2, Pax 1/9,  
63 and Peanut Agglutinin (PNA) caudally (Christ and Ordahl, 1995, Kawamura et al., 2008,  
64 Neubuser et al., 1995, Leitges et al., 2000, Morimoto et al., 2007, Tan et al., 1987, Stern and  
65 Keynes, 1987). Development of the spinal column requires rostro-caudal polarization and then  
66 reorganization of the sclerotome, a process called resegmentation, to allow proper alignment of  
67 the spine with the tendon, musculature, and nerves (Huang et al., 2000, Williams et al., 2019,  
68 Cox and Serra, 2014, Alkhatib et al., 2018). The process of resegmentation is preceded by the  
69 formation of rostral and caudal domains within the sclerotome that regroup during

70 resegmentation in response to stimuli that are still unknown (Remak, 1855, Bagnall et al., 1988,  
71 Huang et al., 2000). Rostral and caudal domains within each sclerotome segment separate and  
72 recombine with the corresponding adjacent segment (Fig. 3A). This results in the formation of a  
73 new sclerotome unit that is now shifted one half segment with respect to the myotome (Huang et  
74 al., 2000, Williams et al., 2019, Alkhatib et al., 2018, Cox and Serra, 2014). The newly  
75 resegmented sclerotome will develop into the VB, and the AF will develop in chick from cells in  
76 the rostral domain immediately adjacent to the original rostral-caudal border at von Ebner's  
77 fissure (Bruggeman et al., 2012). Tendon will form from the cells adjacent to the myotome  
78 (Brent et al., 2003). The signaling pathways that regulate resegmentation are unknown.

79 TGF $\beta$  is a multifunctional growth factor that controls many aspects of development.  
80 TGF $\beta$  signals as a dimer that binds to a heterotetrametric receptor complex on the cell membrane  
81 that consists of two TGF $\beta$  type 1 receptors, TGF $\beta$ R1, and two TGF $\beta$  type two receptors,  
82 TGF $\beta$ R2. Activation of the receptor complex stimulates the phosphorylation of the well  
83 characterized downstream effectors Smad 2/3, or various "non-canonical" downstream effectors  
84 including ERK 1/2, AKT, and p38 (Hata and Chen, 2016, Chen et al., 2019, Zhang, 2009,  
85 Clayton et al., 2020). TGF $\beta$  regulates the expression of markers for fibrous tissues, including AF,  
86 ligament, and tendon, in cultured sclerotome through Smad-dependent and non-canonical  
87 signaling pathways (Clayton et al., 2020, Sohn et al., 2010, Ban et al., 2019, Cox et al., 2014).  
88 Deletion of *Tgfb2* in mouse sclerotome *in vivo* (*Col2aCre;Tgfb2*<sup>LoxP/LoxP</sup>) results in failure of  
89 the AF and other fibrous tissues to form correctly (Baffi et al., 2004, Pryce et al., 2009). In  
90 addition, loss of *Tgfb2* results in phenotypes that would be consistent with defects in  
91 resegmentation including split lamina, disorganized costal joints, loss of the IVD, and defects in  
92 the anterior articular process ( Baffi et al., 2004, Baffi et al., 2006). Furthermore, *Tgbr2* deleted

93 mice demonstrate alterations in the rostro-caudal polarity of the sclerotome with Pax1 and Pax9,  
94 markers of caudal sclerotome, being expressed through the entire segment (Baffi et al., 2006).  
95 Deletion of rostro-caudal markers *Mesp2* and *Rippy 1/2* in mice also contribute to alterations in  
96 the formation of the IVD (Takahashi et al., 2013). Alterations in rostro-caudal polarity and  
97 subsequent resegmentation would be expected to alter the context in which cells differentiate,  
98 affecting development of the spinal column.

99 Here, we provide the first direct evidence that TGF $\beta$  regulates resegmentation. By using a  
100 drug inhibitor, SB431542, to inhibit TGF $\beta$  signaling within the thoracic somites and lipophilic  
101 dyes, DiD and DiO, to lineage trace labeled cells from the somite, we show that TGF $\beta$  signaling  
102 is required for resegmentation of sclerotome. In addition, inhibition of TGF $\beta$  signaling resulted  
103 in mishappen VBs, reduced IVD, and alterations in rostro-caudal polarity of the sclerotome.  
104 Furthermore, we observed increased myofiber development and thickness in SB431542 treated  
105 embryos. We propose that TGF $\beta$  regulates rostro-caudal polarity in the sclerotome, which  
106 subsequently affects resegmentation and development of the spinal column.

107

## 108 RESULTS

### 109 **SB431542 treatment disrupts TGF $\beta$ signaling and formation of the spinal column in chick** 110 **embryos.**

111 Previous studies from our lab showed that TGF $\beta$ R2 is required for the development of  
112 the mouse axial skeleton (*Col2aCre;Tgfb $\beta$ 2<sup>LoxP/LoxP</sup>* mice; Baffi et al., 2004, Baffi et al., 2006).  
113 Some of the defects observed in the *Col2aCre;Tgfb $\beta$ 2<sup>LoxP/LoxP</sup>* mice could be consistent with  
114 defects in resegmentation (Baffi et al., 2006); however, this has not been directly tested. To  
115 directly test the role of TGF $\beta$  in resegmentation, we utilized the chick model since spinal column

116 development is easily observed *in vivo*. First, we demonstrated the efficacy of a TGF $\beta$ R1  
117 inhibitor, SB431542, in chick embryos through determination of the expression pattern and level  
118 of *Scx*, a known downstream target of TGF $\beta$  signaling (Clayton et al., 2020). Embryonic day 2.5  
119 (E2.5) chick embryos were injected with DMSO or SB431542 in paired thoracic somites 19-26  
120 (Fig. 1A). One day later, E3.5, embryos injected with SB431542 showed a reduction in *Scx*  
121 mRNA by in situ hybridization specifically within sclerotome derived from the inhibitor injected  
122 somites (Fig. 1C, white arrows). Sclerotome derived from surrounding somites continued to  
123 express *Scx* mRNA (Fig. 1C) as did sclerotome derived from somites injected with the DMSO  
124 control (Fig. 1B). Next, tissue from the injected area was dissected from E3.5 embryos. Western  
125 blot analysis of protein lysates indicated a statistically significant reduction in *Scx* protein in  
126 SB431542 injected embryos when compared to DMSO controls (Fig. 1D, E). Protein levels  
127 were normalized to the loading control alpha tubulin (Fig. 1D, E). In addition, pSmad3, a direct  
128 effector of TGF $\beta$  signaling, and *Adamts12*, another downstream target of TGF $\beta$ , were  
129 downregulated in SB431542 treated somites relative to DMSO controls (Figure 1D). Reduced  
130 levels of TGF $\beta$  responsive targets in SB431542 treated somites indicated that the inhibitor was  
131 working *in vivo* at the concentrations used.

### 132 **Spinal column development is altered when TGF $\beta$ signaling is inhibited.**

133 We then wanted to determine if the chick model recapitulated the spinal defects seen in  
134 mice. Chicks that were injected with DMSO or SB431542 at E2.5 were harvested at E6.5 and  
135 E12.5 and stained with Alcian blue to highlight cartilage and skeletal development (Fig. 2). E6.5  
136 chick embryos were sectioned, and midline sections were stained with Alcian blue (Fig 2A-D).  
137 Alcian blue stains sulfated glycosaminoglycans and glycoproteins and is a histological marker  
138 for cartilage (Nagy et al., 2009). Compared to control, the spinal column in SB431542 treated

139 embryos demonstrated multiple defects (Fig 2. A-D). Vertebrae walls, red bars, were thinner  
140 (Fig. 2C), IVD disc height, black brackets, was reduced (Fig. 2D), and the rib heads, black  
141 arrows, were malformed in the SB431542 treated group compared to DMSO treated controls.

142 Next, skeletal preparations using Alcian blue and Alizarin red staining were performed  
143 on E12.5 embryos to analyze mature skeletons after inhibiting TGF $\beta$  signaling in somites.  
144 Control embryos had distinct oval shapes of the AF within the IVD space while inhibitor treated  
145 embryos displayed under formed and misshapen AF (Fig. 2E-G, outlined in white).  
146 Quantification of the average area of the AF (outlined in white) indicated that the AF in  
147 SB431542 injected embryos was reduced compared to controls (Fig. 2G), similar to what is  
148 observed in *Col2aCre;Tgfb $\beta$ 2<sup>LoxP/LoxP</sup>* mice. The results indicated that TGF $\beta$  signaling is required  
149 for normal skeletal development in chick and validates the model for subsequent studies.

150

### 151 **Resegmentation is completed in the chick spinal column by E6.5 days.**

152 Many details of resegmentation in the sclerotome are still unknown (Christ et al., 2000,  
153 Goldstein and Kalcheim, 1992, Huang et al., 2000). To determine the time course of sclerotome  
154 resegmentation, we utilized lipophilic, fluorescent tracker dyes. DiD, far red, and DiO, green.  
155 These dyes are dialkylcarbocyanines that intercalate into the cell membrane and thus can be used  
156 as cell lineage tracers of any cells they come into contact with (Honig and Hume, 1989). At E2.5,  
157 thoracic somites 21 through 26, right side only, were injected in an alternating pattern of DiD,  
158 somites 21, 23 and 25, or DiO, somites 22, 24, and 26 (Fig. 3A). This alternating pattern was  
159 done to monitor resegmentation and show how somites eventually contribute to a particular  
160 vertebra (Ward et al., 2017). We chose the thoracic region somites 21-26 because: 1) the large  
161 vitelline artery crosses underneath somite 23 at this developmental stage and therefore, could be

162 used as a reliable morphological marker to inject the same somites in every embryo, 2) these are  
163 newly formed somites at the time of injection and therefore should not have undergone  
164 differentiation, 3) since this is restricted to the thoracic region, they should have the same  
165 resegmentation pattern (Ward et al., 2017), and 4) vertebral fusion does not normally occur in the  
166 thoracic region of *Gallus gallus* until several weeks after hatching. Furthermore, the right axis of  
167 the embryo was injected since after the embryo turns the right side is facing up making imaging  
168 possible.

169 We first used max intensity projection (maxIP) 3D images to visualize DiD and DiO  
170 labeled cells within the spinal column. Max IP projections represented a single time point image  
171 that captures a volumetric snapshot through 150 to 200 microns of the sample. For imaging,  
172 embryos were injected with dyes at E2.5, isolated at the indicated times, embedded in a  
173 yolk/agarose imaging solution to maintain viability, and then imaged on a laser scanning  
174 confocal microscope. Excessive cell death as determined by Calcein-Ethidium cell staining was  
175 not observed in isolated embryos embedded in the yolk/agarose solution even after 12 hrs when  
176 compared to embryos allowed to develop normally in *ex ovo* culture (Fig. S1). One Max IP  
177 image was obtained each day (E2.5 to E6.5) after injection. At E2.5 days, max IP images showed  
178 that the somites were well labeled (Fig. 3B). By E3.5, the spherical shape of the somite became  
179 less distinct suggesting epithelial to mesenchymal transition of cells in the somite (Fig 3B, C;  
180 Fig. S2). In addition, labeled cells on the ventral side of the notochord suggested migration and  
181 formation of sclerotome at E3.5 (Fig 3C; Fig. S2). Growth of the embryo was rapid between  
182 E3.5 and E4.5/ E5.5. There was an increase in the length of the dorsal-ventral axis relative to the  
183 anterior-posterior axis of each sclerotome segment suggesting continued migration of cells  
184 ventrally (Fig 3C- E). At 4.5 and E5.5, the segmented alternately labeled pattern of the



185 sclerotome in the ventral portion of the embryo could be seen (Fig. 3D, E). In addition, as the  
186 embryo grew, it increased in thickness so that by E4.5 only very lateral aspects of the spine (150  
187 to 200 microns deep) could be imaged (Fig. 3D). At E6.5, evidence of resegmentation was  
188 observed in the lateral cartilages between muscle fibers (Fig 3F, blue brackets = cartilage) where  
189 half of each cartilage element was stained far red and half green. To better image the midline,  
190 E6.5 embryos that had been injected with DiD and DiO were sectioned and the vertebrae and  
191 IVDs were identified by counterstaining with rhodamine conjugated peanut agglutinin (PNA)  
192 (Rashid et al., 2020). Sections were simultaneously imaged for all three fluorophores  
193 (rhodamine, DiD, and DiO) and the developing vertebrae were outlined by using the ImageJ  
194 threshold tool to decrease background noise in PNA stained images and then the ROI function  
195 was used to outline the VB (Fig. S3). Each vertebra was labeled half far red and half green, clear  
196 evidence of resegmentation (Fig. 3G). Previously studies have shown a sharp border between red  
197 and green domains with little to no cell mixing (Stern and Keynes, 1987). Our data supported  
198 these previous observations by showing distinctly labeled red and green cell domains except in  
199 the most superficial areas, for example, the developing skin. In summary, labeled cells were  
200 followed each day (Fig.3) and we found that resegmentation was completed by E6.5 with each  
201 developing vertebrae consisting of a half far red and a half green domain (Fig.3 F, G).

202

### 203 **TGF $\beta$ signaling is required for resegmentation.**

204 Next, to determine the role of TGF $\beta$  signaling in resegmentation, SB431542, a TGF $\beta$ R1  
205 inhibitor, or DMSO, was mixed with DiD or DiO in a 1:1 ratio and injected into somites 21-26 in  
206 an alternating pattern as described above (Fig.3A; Fig. 4A). Sections from control and treated  
207 embryos were counterstained with rhodamine conjugated Peanut Agglutinin (PNA) to localize

208 the developing VB as described above (Fig. 4B-E, outlined in white dotted box). When  
209 compared to embryos injected with DMSO, SB431542 injected embryos showed altered  
210 resegmentation patterns (summarized in Fig. 4A). In control embryos, VB consisted of half far  
211 red and half green domains as expected for normal resegmentation (Fig. 4B, F, G). The border  
212 between the labeled domains is marked with a yellow dotted line. Embryos injected with  
213 SB431542 demonstrated changes in the ratio of far red and green labeled domains within the VB  
214 that manifested as full shift, partial shift, slanted border, or a mixture of these. Full shift was  
215 visualized as only one color in the VB (Fig. 4C). A partial shift was defined as a change from 50-  
216 50 in the ratio of the far red and green domains in the VB (Fig. 4D). SB431542 injected embryos  
217 that demonstrated a partial shift had an expanded caudal domain (Fig. 4D, G, F). Slanted border  
218 was defined as an alteration in the ratio of red and green domains but the border between the two  
219 was not straight across the VB (Fig. 4E). Slanted borders also resulted in an overall expanded  
220 caudal domain (Fig. 4E, F, G). Some embryos demonstrated more than one alteration and had  
221 both a partial shift and slanted borders (Fig. 4D). Quantification of the volume of each domain  
222 relative to the total segment indicated that resegmentation was significantly affected by blocking  
223 TGF $\beta$  signaling with SB431542 indicating a role for TGF $\beta$  in resegmentation.

224

### 225 **TGF $\beta$ signaling regulates rostral-caudal patterning in the sclerotome.**

226 Sclerotome is organized into rostral and caudal domains that can be molecularly marked,  
227 for example, by Tenascin expression in the rostral domain and high PNA staining in the caudal  
228 domain (Huang et al., 2000, Stern and Keynes, 1987, Baffi et al., 2006, Cox and Serra, 2014,  
229 Alkhatib et al., 2018, Williams et al., 2019). The observations above suggested that SB431542  
230 treated embryos had defects in resegmentation that resulted in an expansion of the caudal domain

231 in each sclerotome segment. We previously noted that *Col2aCre;Tgfb $\beta$ 2*<sup>LoxP/LoxP</sup> mice  
232 demonstrated expression of Pax1 and Pax9 through the entire sclerotome whereas Pax1/9 were  
233 only expressed in the caudal domain in control mice suggesting expansion of the caudal domain.  
234 Furthermore, rostralization or caudalization of sclerotome results in spinal phenotypes that are  
235 consistent with defects in resegmentation (Takahashi et al., 2013). To test the hypothesis that  
236 TGF $\beta$  signaling affects rostral-caudal polarity in the early chick sclerotome, embryos were  
237 injected with DMSO or SB431542 at E2.5 and markers for rostral (Tenascin) and caudal (PNA)  
238 domains of the sclerotome were localized in sections from E3.5 embryos using  
239 immunofluorescent staining (Fig.5). In DMSO treated embryos, Tenascin was localized to the  
240 rostral domain as expected and localization was comparable in SB431542 injected embryos  
241 (Fig5A, B). Next, sections were stained with PNA. In control embryos, staining was more  
242 intense in the caudal domain (Fig. 5C) as previously described (Stern and Keynes, 1987). In  
243 contrast, in SB431542 treated embryos PNA labeling was expanded throughout the rostral  
244 domain (Fig. 5D). These results along with our previous results in mouse (Baffi et al., 2006)  
245 suggest that TGF $\beta$  signaling regulates rostral-caudal polarity in sclerotome specifically by  
246 limiting the expansion of the caudal domain markers.

247

#### 248 **Myogenic differentiation is altered when TGF $\beta$ signaling is inhibited.**

249 Next, we used live cell imaging to follow labeled somitic cells over time. Embryos were injected  
250 with dyes at E2.5, isolated at indicated times, embedded in a yolk/agarose imaging solution to  
251 maintain viability as described above, and then imaged on a laser scanning confocal microscope  
252 in 12-hour (hr) intervals over the course of 4 days (Fig. 6A). A separate embryo was imaged  
253 every 12 hours. As indicated above, changes in cell death as determined by Calcein-Ethidium

254 cell staining were not observed (Fig S1). At E2.5 days, live cell imaging showed that the somites  
255 were well labeled (Movie 1) and that there was some movement of cells ventrally over the first  
256 12 hrs after labeling (Movie 1). Unfortunately, only the lateral aspects of the labeled embryos  
257 could be observed during live cell imaging as the embryos grew due to limitations of light  
258 penetration with laser scanning confocal microscopy, so we could not follow sclerotome which  
259 forms from the more medial parts of the somite. Nevertheless, we were able to image the  
260 dermamyotome which forms dorsal and lateral to the sclerotome. In labeled control, DMSO  
261 treated embryos, the most striking observation was the appearance of elongated cells in the  
262 dorsal lateral aspect of the embryo starting at about E4.5 days (Movie 2). We hypothesized that  
263 these cells were developing myocytes based on their morphology and confirmed by staining  
264 sections containing the elongated cells with MF20, a known myocyte marker (Fig 6B). We then  
265 observed myocyte formation in labeled SB431542 treated embryos (Movie 3). The elongated  
266 cells appeared increased in number and thickness when compared to control embryos (Movie 2  
267 and Movie 3). We then compared sections from control and SB431542 treated embryos for  
268 MF20 expression by immunofluorescent staining (Fig 6. B, C). The area between the ribs  
269 containing hypaxial muscle fibers in E6.5 embryos was compared. Fibers appeared thicker in the  
270 SB431542 treated embryos. This was confirmed through morphometric analysis (Fig. 6 D).  
271 There was a statistically significant increase in myofiber thickness in the SB431542 treated  
272 embryos. This observation is supported by previous studies that show TGF $\beta$  signaling acts as an  
273 inhibitor of myofiber differentiation; therefore, inhibition of TGF $\beta$  signaling caused increased  
274 myofiber differentiation in SB431542 injected embryos (Liu et al., 2001, Kollias and  
275 McDermott, 2008).

276

277 DISCUSSION

278           The importance of TGF $\beta$  signaling in the development of the spinal column has been  
279 shown in numerous studies (Baffi et al., 2004, Baffi et al., 2006, Cox et al., 2014, Ban et al.,  
280 2019). Phenotypes in mice with conditional deletion of *Tgfb2* in sclerotome are consistent with  
281 defects in resegmentation although resegmentation was not tested directly (Baffi et al., 2004,  
282 Baffi et al., 2006). Here we directly tested the role of TGF $\beta$  signaling in sclerotome  
283 resegmentation during spinal column formation. We used lineage tracer dyes, DiD and DiO to  
284 follow somite derivatives including the sclerotome over time, and SB431542, a TGF $\beta$ R1  
285 inhibitor, to determine the role of TGF $\beta$  signaling in resegmentation and development of the  
286 spinal column. The chick model was chosen for this study due to its ability to develop and  
287 remain viable in *ex ovo* culture conditions. *Ex ovo* culturing of embryos permits easy  
288 manipulation and visualization of developmental processes (Aoyama and Asamoto, 2000, Christ  
289 et al., 2004, Huang et al., 2000). In addition, it has been demonstrated that the processes of  
290 resegmentation and sclerotome differentiation in chick are similar to that of mouse and human  
291 (Tanaka and Uthoff, 1981, Takahashi et al., 2013). We established that SB431542 inhibited  
292 TGF $\beta$  signaling in chick somites at the concentrations used by looking at expression of known  
293 down-stream targets of TGF $\beta$ , most notably *Scx* (Clayton et al., 2020). We also showed a  
294 reduction in the AF of the IVD after treatment with SB431542, similar to what is seen in *Tgfb2*  
295 conditionally deleted mice (Baffi et al., 2004) further supporting the use of chick as a model in  
296 these experiments.

297           Increased thickness of MF20 labeled myofibers was observed in SB431542 injected  
298 chick embryos. TGF $\beta$  signaling has been shown to act as an inhibitor of myofiber differentiation  
299 acting through Smad3 to inhibit MyoD, one of the master transcriptional regulators of muscle

300 development (Kollias and McDermott, 2008, Liu et al., 2001, Filvaroff et al., 1994). TGF $\beta$   
301 inhibited myoblasts were not able to fuse to form myotubes (Filvaroff 1994). In addition,  
302 treatment of limb bud organ cultures with neutralizing antibodies to TGF- $\beta$  ligands resulted in  
303 the early appearance of large secondary myotubes, similar to what we observed here (Kollias and  
304 McDermott, 2008, Cusella-De Angelis et al., 1994). It was suggested that TGF- $\beta$  prevents  
305 premature differentiation of migrating myoblasts to permit proper muscle formation (Kollias and  
306 McDermott, 2008). Our observations in chick further support this function of TGF- $\beta$  in muscle  
307 development as well as supporting pharmacological inhibition of TGF- $\beta$  signaling in the chick  
308 model.

309       Rostral-caudal polarity in the sclerotome has been shown to be important for IVD  
310 formation. “Rostralizing” or “caudalizing” mouse sclerotome through deletion of specific  
311 transcription factor markers of the rostral or caudal domains had severe effects on IVD  
312 differentiation and spinal column formation (Takahashi et al., 2013). For example, deletion of  
313 *Mesp2*, a marker of rostral sclerotome, or *Ripply1/2*, a marker of caudal sclerotome, resulted in  
314 misshapen vertebrae and missing IVDs supporting the importance of rostro-caudal identity in  
315 development of the spine (Takahashi et al., 2013). In the present study, we showed that  
316 resegmentation was completed by E6.5 in the chick and was disrupted in the presence of  
317 SB431542 as evidenced by the altered pattern of DiO and DiD labeled domains in the VBs. We  
318 noticed that the caudal labeled domains were shifted rostrally, with a smaller rostral domain in  
319 treated compared to controls. We hypothesized that this caudal shift was reflective of disrupted  
320 rostro-caudal polarity in earlier sclerotome. One of the most notable defects in *Col2aCre;Tgfb2*  
321 <sup>LoxP/LoxP</sup> mice was alterations in the polarity of the early sclerotome before resegmentation (Baffi  
322 et al., 2004 Baffi et al., 2006). Expansion of the caudal domain, as measured by Pax1/9

323 expression, anteriorly without alterations in localized expression of Tbx18, a rostral marker, in  
324 Col2aCre;*Tgfbr2*<sup>LoxP/LoxP</sup> mice resulted in both rostral and caudal markers being co-expressed in  
325 the rostral half of the sclerotome (Baffi et al., 2006). Here, we used Tenascin as a marker of  
326 rostral sclerotome and PNA as a marker of caudal sclerotome. Treatment with SB431542 did not  
327 alter the expression domain of Tenascin; however, the expression domain of PNA was expanded  
328 through the entire sclerotome segment so that it overlapped with Tenascin. This unusual rostro-  
329 caudal pattern is similar to what we saw in Col2aCre;*Tgfbr2*<sup>LoxP/LoxP</sup> mice (Baffi et al 2006). The  
330 occurrence of the same unique patterning in two different animal models supports the hypothesis  
331 that TGF $\beta$  regulates rostro-caudal polarity in the sclerotome.

332 It has been suggested but not shown directly that alterations in rostral-caudal polarity  
333 affect resegmentation (Takahashi et al., 2013). We propose that early alterations in rostro-caudal  
334 polarity in the sclerotome due to inhibition of TGF $\beta$  signaling contribute to the observed  
335 disruption in resegmentation. Alterations in rostro-caudal polarity and subsequent  
336 resegmentation would then be expected to alter the context in which cells differentiate, affecting  
337 development of the spinal column. In the chick, the IVD forms from the rostral domain of the  
338 sclerotome near von Ebner's fissure, which is the boundary that separates the rostro-caudal  
339 domains (Bruggeman et al., 2012). Aberrant expression of caudal markers rostrally could be  
340 influencing how and where von Ebner's fissure forms and thus cause alterations in  
341 resegmentation. In addition, co-expression of both rostral and caudal genes within the rostral  
342 domain in chick as a result of inhibition of TGF $\beta$  signaling could potentially cause alterations in  
343 differentiation pathways in the rostral domain leading to IVD malformations. Many domain  
344 markers are transcription factors initiating distinct differentiation protocols within their  
345 respective domains (Leitges et al., 2000, Morimoto et al., 2007, Kawamura et al., 2008).

346 Inappropriate expression of these markers rostrally due to inhibition of TGF $\beta$  signaling could  
347 result in alterations in cell fate decisions that would affect development of the spinal column, and  
348 in this case the AF. Alterations in rostro-caudal polarity and subsequent resegmentation would  
349 also be expected to alter the context in which cells differentiate, affecting development of the  
350 spinal column. Alterations to cell fate decisions after resegmentation could then occur because  
351 cells are not in the correct locations to receive instructive, permissive, or competence signals.

352 In summary, this study provides the first direct evidence that TGF $\beta$  regulates  
353 resegmentation. We propose that TGF $\beta$  regulates rostro-caudal polarity in the sclerotome, which  
354 subsequently affects resegmentation and placement or differentiation of tissues within the spinal  
355 column.

356



## 357 MATERIALS AND METHODS

### 358 ***Ex ovo* chick embryo culture**

359 Specific Pathogen Free Premium Fertilized eggs (Charles River) were incubated at 99 degrees  
360 Fahrenheit and 55% humidity in a GQF 1500 series incubation cabinet (GQF Manufacturing  
361 Company) for 60-65 hours, 2 and a half days (E2.5), until embryonic stage HH16. After  
362 incubation, eggs were cracked and cultured in Deep Dish Petri Dishes (Fisherbrand) using  
363 previously published conditions (Auerbach et al., 1974, Yalcin et al., 2010) before being  
364 injected. Injected embryos were then returned to the incubator and allowed to grow until the  
365 indicated embryonic stage/ developmental day. Preestablished exclusion criteria included any  
366 embryo that had a birth defect on the day of injection and contamination or death of the embryo  
367 before the end point of the experiment. Statistics including T-tests and ANOVA were performed  
368 to quantify various descriptive endpoints. Tests were run to assure that the data were normal and  
369 that variance was equal between each group using GraphPad Prism before the appropriate  
370 statistical test was selected. All graphed data is shown as individual data points.

371

### 372 **Embryo injections**

373 All injections were performed using a Pli-100A pico-liter microinjector (Warner Instruments) at  
374 embryonic day 2.5 (E2.5). Selection for animals that were injected with either DMSO or  
375 SB431542 were randomized. The embryos analyzed on different developmental days for the  
376 microscopy experiments were matched for similar Hamburger and Hamilton (HH) stages to  
377 make a more accurate comparison between DMSO and SB431542 treatments. For skeletal  
378 preparations, western blot, and whole mount *in situ* analysis, eggs were cracked and injected  
379 with a control solution of DMSO or 50 $\mu$ M SB431542 Catalog #S1067 (Tocris) in thoracic  
380 somites 19 through 26. Somites were injected with solution until there was visible swelling in the  
381 somite. After injections, embryos were placed back into the incubator and cultured for 24 hours  
382 to reach embryonic day 3.5 (E3.5) for western blot, immunostaining, and whole mount *in situ*  
383 hybridization. Histology was done at E6.5 days. For skeletal preparations, embryos were cultured  
384 for 10 days post injections until embryonic day 12.5 (E12.5). For lineage tracing experiments,  
385 E2.5 embryos were injected with fluorescent, lipophilic dyes, DiD Catalog #D7757 and DiO  
386 Catalog #D257 (Thermofisher Scientific), with or without the presence of 50 $\mu$ M SB431542 into  
387 somites 21 through 26 on the right side only. DiD was injected into somites 21, 23 and 25, and

388 DiO was injected into somites 22, 24 and 26. After injections, embryos were collected  
389 immediately after injections at E2.5 and then for 24hrs up to 4 days post injections until E6.5 for  
390 confocal imaging or histology experiments.

391  
392 **Skeletal preparations**  
393 Injected embryos were allowed to reach E12.5 and then sacrificed. Embryos were removed from  
394 their extraembryonic membranes, decapitated, washed in Dubeccos phosphate buffered saline  
395 (DPBS) (Gibco), fixed for 1 hour in 4% paraformaldehyde (PFA), and then submerged in 70%  
396 ethanol overnight. The skin and organs were then removed before placing the embryos in the  
397 alcian blue solution (10mg X-Gal powder (Thermofisher Scientific), 20mL acetic acid and 80mL  
398 95% ethanol) overnight (Nagy et al., 2009). Embryos were then rehydrated in 50% and then 25%  
399 ethanol: 0.5% potassium hydroxide washed before being stained with alizarin red (0.002%  
400 powder in 0.5% potassium hydroxide) for 24hours. Tissues were cleared in increasing  
401 concentrations of glycerol: 0.5% potassium hydroxide before being stored and imaged in 100%  
402 glycerol. Images were taken on an Olympus SZX12 microscope using a 0.5X PF objective. To  
403 measure IVD area changes, Image J was used to draw ROIs around the IVDs above thoracic  
404 vertebrae 5, 6, and 7 (T5, T6, T7) in each embryo, and area of each ROI was calculated.  
405 Differences between groups was analyzed using an unpaired two-tailed t-test in GraphPad Prism.

406  
407 **Whole mount *in situ***  
408 Injected embryos were allowed to reach E3.5, isolated, and washed in diethyl pyrocarbonate  
409 (DEPC) treated PBS. To perform whole mount *in situ*, the protocol reported in (Riddle et al.,  
410 1993) was used. The pBS cScx 3'UTR plasmid Catalog #13957 (Addgene) created by  
411 (Schweitzer et al., 2001) was used as the template to create the Scx mRNA probe by utilizing the  
412 DIG RNA Labeling Kit Catalog #11175025910 (Roche) and the T3 RNA polymerase Catalog  
413 #11031163001 (Roche). Staining of the embryos was completed using BM-Purple substrate  
414 Catalog # 11442074001 (Roche), and imaging was done with an Olympus SZX12 microscope  
415 using a 0.5X PF objective.

416  
417 **Western blot**

418 Injected tissue was isolated from the thoracic region of embryos and lysed with Radio  
419 Immunoprecipitation Assay (RIPA) buffer (Roche). Total protein concentration was measured  
420 using a DC Protein Assay kit (Bio-Rad Laboratories) and 40µg of protein lysate per sample was  
421 loaded on 4-20% polyacrylamide gels (Bio-Rad Laboratories) for separation. Protein was then  
422 transferred to polyvinylidene fluoride membranes using a Trans-Blot Turbo Transfer system  
423 (Bio-Rad Laboratories). All membranes were blocked with 5% Bovine Serum Albumin (Sigma-  
424 Aldrich) and incubated with anti-SCXA antibody, Catalog #PA5-23943 (Invitrogen); anti-  
425 phospho Smad23 Catalog #8828S (Cell Signaling); anti-Smad3 Catalog #9513S (Cell Signaling);  
426 anti-Adamts12 Catalog #ab97603 (Abcam); and anti- $\alpha$  tubulin Catalog #200-301-880,  
427 (Rockland) overnight at 4 degrees Celsius. Membranes were washed with Tris-buffered saline  
428 containing 0.1% Tween 20 (TBST) and incubated with anti-Rabbit-HRP, Catalog #7074S (Santa  
429 Cruz Biotechnology) for 1 hour at room temperature. The chemiluminescence was detected by  
430 the Supersignal West Dura kit (Thermo Scientific). All images were acquired on a ChemiDoc  
431 MP system (Bio-Rad Laboratories), and quantification of blots was performed using ImageJ.  
432 Statistical analyses were performed using an unpaired, two-tailed t-test on GraphPad Prism.  
433 Asterisks denote  $p < 0.05$

434

### 435 **Confocal microscopy and live-cell imaging**

436 After indicated post injection incubation times, embryos were isolated and dissected. For E2.5  
437 embryos the entire embryo was imaged, for E3.5 embryos the head was removed, for E4.5 and  
438 E5.5 embryos the head and limb buds were removed, and for E6.5 embryos the head, limb buds,  
439 and skin were removed to better visualize labeled cells. Embryos were placed in a glass bottom,  
440 cell imaging dish Catalog #0030740009 (Eppendorf) and submerged in imaging solution (80%  
441 egg white and 20% 1.2% UltraPure LMP Agarose Catalog #16500100 (Invitrogen) in Ringer's  
442 solution (FisherScientific). Embryos were then taken to the microscopy core for 3D imaging on a  
443 Nikon Ti2 laser scanning confocal. For maximum intensity projections (maxIP), the 10x  
444 objective was used to capture images at a depth of 2.5-3.5 µm/z through the z plane for a total  
445 thickness of 150-200µm dependent upon the embryonic stage. Z stacks were combined to make a  
446 maxIP. For live-cell imaging, embryos were placed into a Tokai Hit incubation stage chamber at  
447 37 degrees Celsius to maintain viability. Embryos were imaged every 10 minutes for 12 hours to  
448 produce 73 z stacks per embryo and the average z stack took 8-9 minutes. Z stacks were then

449 combined into maxIP images and then looped together to make a video. To capture development  
450 of the spinal column from injections at E2.5 to resegmentation at E6.5, a total of 9 embryos  
451 underwent live-cell imaging, with a different embryo being imaged every 12 hours over the span  
452 of 4 days. All maxIP images and videos were made using the Nikon NIS-Elements Advanced  
453 Research software. Replicate numbers for each image and video are indicated in the figure  
454 legends. Videos are located in the supplemental figures section.

455

## 456 **Histology**

457 The spinal column was dissected from isolated embryos, washed in PBS, and fixed for 1hr in 4%  
458 PFA. Embryos were placed in 30% sucrose overnight at 4 degrees Celsius and then placed in  
459 graded 30% sucrose: OCT solutions for 1 hour until reaching 100% OCT. Embryos were  
460 embedded in OCT and 10 $\mu$ m sections were made using a Lecia cryostat. Slides were fixed with  
461 4% PFA for 20 minutes before immunofluorescence (IF) or histological staining. For alcian blue  
462 staining, slides were treated with alcian blue overnight in a humidified chamber at 4 degrees  
463 Celsius and then imaged with an Olympus SZX12 microscope using a 1X PF objective. For  
464 peanut agglutinin (PNA) staining, slides were permeabilized with 0.1% Triton X for 10 minutes  
465 and then blocked in 1% BSA for 30 minutes. PNA-Rhodamine (Vector Labs) was added to slides  
466 at a dilution of 1:100 for 1 hour. Immunofluorescence was conducted by permeabilizing with  
467 0.1% TritonX and blocking in 1% Goat serum in TBST before adding the primary antibodies of  
468 anti- MF20 (DSHB) at a dilution of 7:250, anti-Tenascin (DSHB) at a dilution of 1 $\mu$ g/250 $\mu$ l. An  
469 anti-mouse Alexa 555 secondary was added at a dilution of 1:250. Indicated slides were treated  
470 with Hoechst 33258 (Invitrogen) at a dilution of 1:1000 before being mounted and imaged with  
471 an Olympus fluorescent microscope using a 20X PF objective. To measure myofiber fiber  
472 differences via MF20, ImageJ was used to zoom in and take images from the left, middle, and  
473 right of each image. The width of all myofibers, white brackets in panels B and D, in each  
474 zoomed in area was measured and average fiber thickness per sample was calculated.

475

476

477 **Acknowledgements**

478 This study was funded by R01 AR053860 to R.S and T32 AR069516 (PI Bridges) to SWC. A  
479 special thanks to Robert Grabski, PhD in the UAB High Resolution Imaging Facility, P30  
480 AR048311, for the extensive training on the laser-scanning confocal that allowed the collection  
481 and analysis of the live-cell imaging data. Figures 1A, 3A, 4A, and 6A were created at  
482 Biorender.com.

483

484 **Author Contributions**

485 S.W.C. and R.S. contributed to the conception and design of the study. S.W.C. and R.M.  
486 acquired the data. S.W.C. and R.S. contributed to the analysis and interpretation of the data, as  
487 well as writing the manuscript. All authors approved the final version of the manuscript and take  
488 responsibility for the integrity of the work.

489

490 **Ethic declarations**

491 *Competing interests*

492 The authors have no competing interest to declare.

493

494

495 **Fig. 1: SB431542 treatment disrupts TGF $\beta$  signaling and formation of the spinal column in**  
496 **chick embryos.** (A) Schematic of *ex ovo* culture and injection in chick embryos. (B, C) Whole  
497 mount *in situ* hybridization in E3.5 embryos with an antisense probe to *Scx* mRNA. (B) DMSO  
498 injected control embryos (n=5) or (C) SB431542 injected embryos (n=3). The white arrows in  
499 panel C denote the range of SB431542 injection. (D) Thoracic tissue was isolated from control  
500 and treated embryos and western blot analysis was conducted using pSmad3 (n=3), Smad3  
501 (n=3), *Scx* (n=7), *Adamtsl2* (n=2), and  $\alpha$  tubulin (n=7) specific antibodies.  $\alpha$  tubulin was used as  
502 a loading control. (E) Densitometry was used to quantify relative expression of *Scx*/  $\alpha$  tubulin  
503 from western blots (n=7). Differences between groups was analyzed using an unpaired two-tailed  
504 t-test in GraphPad Prism. n= denotes the number of biological replicates. \* = p < 0.05. Left is  
505 ventral and right is dorsal, top is anterior and bottom is posterior in B and C.

506  
507 **Fig. 2: Spinal column development is altered when TGF $\beta$  signaling is inhibited.** (A-D) E6.5  
508 embryos were embedded in OCT, sectioned, and the midline sections that showed the notochord  
509 were stained with alcian blue. (A) Control embryos (n=5) or those treated with (B) SB431541  
510 (n=5) showed (C) reduced vertebral wall thickness and (D) reduced IVD height. A' and B' are  
511 magnified regions from panels A and B. The black arrows in panels A' and B' point to the rib  
512 head. Black brackets indicate the disc space, and the red bars indicate the VB wall thickness. (E-  
513 G) Skeletal preparations using alcian blue and alizarin red staining were performed on E12.5  
514 embryos. The thoracic segment of (E) DMSO control (n=4) and (F) SB431542 treated (n=5)  
515 embryos were observed and the (G) IVD area was quantified. n= denotes the number of  
516 biological replicates. \* = p < 0.05. NC, notochord; D, dorsal; V, ventral.

517  
518 **Fig. 3: Resegmentation is completed in the chick spinal column by E6.5 days.** (A) Schematic  
519 of lipophilic dye injections and the process of resegmentation in thoracic sclerotome. (B-F)  
520 Embryos were isolated after dye injections and 3D volumetric projections (maxIP images) of the  
521 embryos were acquired starting at (B) E2.5 days (n=3) and taken every 24hrs at (C) E3.5 (n=3),  
522 (D) E4.5 (n=3), (E) E5.5 (n=11) until (F) E6.5 (n= 6) where resegmentation was evident in the  
523 cartilaginous rib heads (F, blue brackets). (G) A section of an E6.5 embryo at the midline  
524 showed evidence of resegmentation in the VBs (outlined by white boxes) (n=5). The yellow  
525 brackets in panel E show where the labeled cells that have migrated ventrally have begun to  
526 segment. The white arrowheads in panel G show the IVD regions. n= denotes the number of

527 biological replicates. Scl, sclerotome; NC, notochord; My, myotome; M, muscle; T, thoracic  
528 vertebrae; R, rostral; C, caudal. Dorsal is right. Ventral is left. Anterior is to the top and posterior  
529 to the bottom.

530  
531 **Fig. 4: Inhibition of TGF $\beta$  signaling disrupts resegmentation.** (A) Schematic of the process of  
532 normal resegmentation compared to altered resegmentation in SB431542 treated embryos at E6.5  
533 days. SB431542 treated embryos were grouped into three different categories, full shift (n=3),  
534 partial shift (n=3), or slanted (n=3), based on the border between far red and green stained cells  
535 within the VB. (B) DMSO (n=5) or (C-E) SB431542 injected embryos were counterstained with  
536 peanut agglutinin-RITC (PNA) and Hoechst and the vertebral body was outlined in white. The  
537 outlined VB area was then superimposed over the images of DiD/DiO labeled cells on the same  
538 slides (B'-E'). Examples of (C) a full shift (n=3), (D) partial shift (n=3), and (E) slanted shift  
539 (n=3) are shown. (F) An ANOVA analysis was used to compare the differences in the DiD/DiO  
540 labeled rostral and caudal zones in DMSO versus SB431542 vertebrae. (G) All comparisons are  
541 listed in the table. A Tukey's post hoc analysis was used to compare differences between groups.  
542 VBs (white dotted squares) were outlined using the threshold and ROI tools on Image J. Rostro  
543 caudal boundary is denoted by a yellow dotted line. Left is ventral, and right is dorsal. n=  
544 denotes the number of biological replicates. So, somite; Scl, sclerotome; NC, notochord; T,  
545 thoracic vertebrae; R, rostral; C, caudal.

546  
547 **Fig. 5: TGF $\beta$  signaling regulates rostral-caudal patterning in the sclerotome.** (A, C) DMSO  
548 or (B,D) SB431542 injected E3.5 embryos were embedded in OCT, sectioned, and slides  
549 containing clear somite borders were selected. (A) DMSO control embryos (n=4) and (B)  
550 SB431542 (n=7) embryos were stained with a Tenascin antibody to label the rostral domain in  
551 somites. (C) DMSO control (n=3) embryos and (D) SB431542 embryos (n=4) were also stained  
552 with PNA to label the caudal domain in somites. (A'-D'). Hoechst was used as the counter stain.  
553 Left is ventral and right is dorsal. n= denotes the number of biological replicates. DM,  
554 dermomyotome.

555  
556 **Fig. 6: Myogenic differentiation is altered when TGF $\beta$  signaling is inhibited.** (A) Schematic  
557 of the live cell imaging timeline. Chicks were injected with lipophilic dyes at E2.5 days then  
558 isolated and imaged for 12hrs starting at 8pm on the day of injections. A different chick was



559 isolated and imaged every 12hours over the course of 4 days from 8am-8pm or 8pm-8am until  
560 E6.5. Movies are located in the supplemental figures section. (B,C) E6.5 embryos were  
561 embedded in OCT, sectioned, and slides containing ribs and hypaxial muscle fibers were  
562 selected and stained with MF20 (pink) and counter stained with Hoechst (blue). (B) DMSO  
563 injected controls (B') zoomed in region from white box in B (n=4). (C) SB431542 injected  
564 embryos (C') a zoomed in region from white box in C (n=6). (D) Average myofiber thickness  
565 (white brackets) was measured using ImageJ, and averages were analyzed using an unpaired  
566 two-tailed t-test in GraphPad Prism. \* =  $p < 0.05$ . n= denotes the number of biological replicates.  
567 Left is ventral, and right is dorsal.

568

569

570

571

572

573



- 574  
575  
576  
577 ALKHATIB, B., BAN, G. I., WILLIAMS, S. & SERRA, R. 2018. IVD Development: Nucleus  
578 Pulposus Development and Sclerotome Specification. *Current Molecular Biology Reports*, 1-  
579 10.
- 580 AOYAMA, H. & ASAMOTO, K. 2000. The developmental fate of the rostral/caudal half of a  
581 somite for vertebra and rib formation: experimental confirmation of the resegmentation  
582 theory using chick-quail chimeras. *Mech Dev*, 99, 71-82.
- 583 AUERBACH, R., KUBAI, L., KNIGHTON, D. & FOLKMAN, J. 1974. A simple procedure for  
584 the long-term cultivation of chicken embryos. *Dev Biol*, 41, 391-4.
- 585 BAFFI, M. O., MORAN, M. A. & SERRA, R. 2006. Tgfr2 regulates the maintenance of  
586 boundaries in the axial skeleton. *Dev Biol*, 296, 363-74.
- 587 BAFFI, M. O., SLATTERY, E., SOHN, P., MOSES, H. L., CHYTIL, A. & SERRA, R. 2004.  
588 Conditional deletion of the TGF-beta type II receptor in Col2a expressing cells results in  
589 defects in the axial skeleton without alterations in chondrocyte differentiation or embryonic  
590 development of long bones. *Dev Biol*, 276, 124-42.
- 591 BAGNALL, K. M., HIGGINS, S. J. & SANDERS, E. J. 1988. The contribution made by a single  
592 somite to the vertebral column: experimental evidence in support of resegmentation using the  
593 chick-quail chimaera model. *Development*, 103, 69-85.
- 594 BAN, G. I., WILLIAMS, S. & SERRA, R. 2019. Antagonism of BMP signaling is insufficient to  
595 induce fibrous differentiation in primary sclerotome. *Exp Cell Res*, 378, 11-20.
- 596 BRENT, A. E., SCHWEITZER, R. & TABIN, C. J. 2003. A Somitic Compartment of Tendon  
597 Progenitors. *Cell*, 113, 235-248.
- 598 BRUGGEMAN, B. J., MAIER, J. A., MOHIUDDIN, Y. S., POWERS, R., LO, Y.,  
599 GUIMARAES-CAMBOA, N., EVANS, S. M. & HARFE, B. D. 2012. Avian intervertebral  
600 disc arises from rostral sclerotome and lacks a nucleus pulposus: implications for evolution  
601 of the vertebrate disc. *Dev Dyn*, 241, 675-83.
- 602 CHEN, S., LIU, S., MA, K., ZHAO, L., LIN, H. & SHAO, Z. 2019. TGF- $\beta$  signaling in  
603 intervertebral disc health and disease. *Osteoarthritis Cartilage*, 27, 1109-1117.

- 604 CHRIST, B., HUANG, R. & SCAAL, M. 2004. Formation and differentiation of the avian  
605 sclerotome. *Anat Embryol (Berl)*, 208, 333-50.
- 606 CHRIST, B., HUANG, R. & SCAAL, M. 2007. Amniote somite derivatives. *Dev Dyn*, 236,  
607 2382-96.
- 608 CHRIST, B., HUANG, R. & WILTING, J. 2000. The development of the avian vertebral  
609 column. *Anat Embryol (Berl)*, 202, 179-94.
- 610 CHRIST, B. & ORDAHL, C. P. 1995. Early stages of chick somite development. *Anat Embryol*  
611 *(Berl)*, 191, 381-96.
- 612 CLAYTON, S. W., BAN, G. I., LIU, C. & SERRA, R. 2020. Canonical and noncanonical TGF-  
613  $\beta$  signaling regulate fibrous tissue differentiation in the axial skeleton. *Sci Rep*, 10, 21364.
- 614 COX, M. K., APPELBOOM, B. L., BAN, G. I. & SERRA, R. 2014. Erg cooperates with TGF-  
615 beta to control mesenchymal differentiation. *Exp Cell Res*, 328, 410-8.
- 616 COX, M. K. & SERRA, R. 2014. Development of the Intervertebral Disc. *The Intervertebral*  
617 *Disc*, 33-51.
- 618 CUSELLA-DE ANGELIS, M. G., MOLINARI, S., LE DONNE, A., COLETTA, M.,  
619 VIVARELLI, E., BOUCHE, M., MOLINARO, M., FERRARI, S. & COSSU, G. 1994.  
620 Differential response of embryonic and fetal myoblasts to TGF beta: a possible regulatory  
621 mechanism of skeletal muscle histogenesis. *Development*, 120, 925-33.
- 622 FAN, C. M., LEE, C. S. & TESSIER-LAVIGNE, M. 1997. A role for WNT proteins in induction  
623 of dermomyotome. *Dev Biol*, 191, 160-5.
- 624 FAN, C. M. & TESSIER-LAVIGNE, M. 1994. Patterning of mammalian somites by surface  
625 ectoderm and notochord: evidence for sclerotome induction by a hedgehog homolog. *Cell*,  
626 79, 1175-86.
- 627 FILVAROFF, E. H., EBNER, R. & DERYNCK, R. 1994. Inhibition of myogenic differentiation  
628 in myoblasts expressing a truncated type II TGF-beta receptor. *Development*, 120, 1085-95.
- 629 GOLDSTEIN, R. S. & KALCHEIM, C. 1992. Determination of epithelial half-somites in  
630 skeletal morphogenesis. *Development*, 116, 441-5.

- 631 HATA, A. & CHEN, Y. G. 2016. TGF- $\beta$  Signaling from Receptors to Smads. *Cold Spring Harb*  
632 *Perspect Biol*, 8.
- 633 HONIG, M. G. & HUME, R. I. 1989. Dil and diO: versatile fluorescent dyes for neuronal  
634 labelling and pathway tracing. *Trends Neurosci*, 12, 333-5, 340-1.
- 635 HUANG, R., ZHI, Q., BRAND-SABERI, B. & CHRIST, B. 2000. New experimental evidence  
636 for somite resegmentation. *Anat Embryol (Berl)*, 202, 195-200.
- 637 KALCHEIM, C. & BEN-YAIR, R. 2005. Cell rearrangements during development of the somite  
638 and its derivatives. *Curr Opin Genet Dev*, 15, 371-80.
- 639 KAWAMURA, A., KOSHIDA, S. & TAKADA, S. 2008. Activator-to-repressor conversion of  
640 T-box transcription factors by the Ripply family of Groucho/TLE-associated mediators. *Mol*  
641 *Cell Biol*, 28, 3236-44.
- 642 KOLLIAS, H. D. & MCDERMOTT, J. C. 2008. Transforming growth factor-beta and myostatin  
643 signaling in skeletal muscle. *J Appl Physiol (1985)*, 104, 579-87.
- 644 LEITGES, M., NEIDHARDT, L., HAENIG, B., HERRMANN, B. G. & KISPERS, A. 2000.  
645 The paired homeobox gene *Uncx4.1* specifies pedicles, transverse processes and proximal  
646 ribs of the vertebral column. *Development*, 127, 2259-67.
- 647 LIU, D., BLACK, B. L. & DERYNCK, R. 2001. TGF-beta inhibits muscle differentiation  
648 through functional repression of myogenic transcription factors by Smad3. *Genes Dev*, 15,  
649 2950-66.
- 650 MARCELLE, C., STARK, M. R. & BRONNER-FRASER, M. 1997. Coordinate actions of  
651 BMPs, Wnts, Shh and noggin mediate patterning of the dorsal somite. *Development*, 124,  
652 3955-63.
- 653 MATSAKAS, A., FOSTER, K., OTTO, A., MACHARIA, R., ELASHRY, M. I., FEIST, S.,  
654 GRAHAM, I., FOSTER, H., YAWORSKY, P., WALSH, F., DICKSON, G. & PATEL, K.  
655 2009. Molecular, cellular and physiological investigation of myostatin propeptide-mediated  
656 muscle growth in adult mice. *Neuromuscul Disord*, 19, 489-99.
- 657 MORIMOTO, M., SASAKI, N., OGINUMA, M., KISO, M., IGARASHI, K., AIZAKI, K.,  
658 KANNO, J. & SAGA, Y. 2007. The negative regulation of *Mesp2* by mouse *Ripply2* is  
659 required to establish the rostro-caudal patterning within a somite. *Development*, 134, 1561-9.

- 660 NAGY, A., GERTSENSTEIN, M., VINTERSTEN, K. & BEHRINGER, R. 2009. Alcian blue  
661 staining of the mouse fetal cartilaginous skeleton. *Cold Spring Harb Protoc*, 2009,  
662 pdb.prot5169.
- 663 NEUBUSER, A., KOSEKI, H. & BALLING, R. 1995. Characterization and developmental  
664 expression of Pax9, a paired-box-containing gene related to Pax1. *Dev Biol*, 170, 701-16.
- 665 PRYCE, B. A., WATSON, S. S., MURCHISON, N. D., STAVEROSKY, J. A., DUNKER, N. &  
666 SCHWEITZER, R. 2009. Recruitment and maintenance of tendon progenitors by TGFbeta  
667 signaling are essential for tendon formation. *Development*, 136, 1351-61.
- 668 RASHID, D. J., BRADLEY, R., BAILLEUL, A. M., SURYA, K., WOODWARD, H. N., WU,  
669 P., WU, Y. B., MENKE, D. B., MINCHEY, S. G., PARROTT, B., BOCK, S. L.,  
670 MERZDORF, C., NAROTZKY, E., BURKE, N., HORNER, J. R. & CHAPMAN, S. C.  
671 2020. Distal spinal nerve development and divergence of avian groups. *Sci Rep*, 10, 6303.
- 672 REMAK, R. 1855. Investigations on the Development of Vertebrate Animals [in German].  
673 *Berlin: G Reimer*, 39-40, 122-124.
- 674 RIDDLE, R. D., JOHNSON, R. L., LAUFER, E. & TABIN, C. 1993. Sonic hedgehog mediates  
675 the polarizing activity of the ZPA. *Cell*, 75, 1401-16.
- 676 SCHWEITZER, R., CHYUNG, J. H., MURTAUGH, L. C., BRENT, A. E., ROSEN, V.,  
677 OLSON, E. N., LASSAR, A. & TABIN, C. J. 2001. Analysis of the tendon cell fate using  
678 Scleraxis, a specific marker for tendons and ligaments. *Development*, 128, 3855-66.
- 679 SOHN, P., COX, M., CHEN, D. & SERRA, R. 2010. Molecular profiling of the developing  
680 mouse axial skeleton: a role for Tgfb2 in the development of the intervertebral disc. *BMC*  
681 *Dev Biol*, 10, 29.
- 682 STERN, C. D. & KEYNES, R. J. 1987. Interactions between somite cells: the formation and  
683 maintenance of segment boundaries in the chick embryo. *Development*, 99, 261-72.
- 684 TAKAHASHI, Y., YASUHIKO, Y., TAKAHASHI, J., TAKADA, S., JOHNSON, R. L.,  
685 SAGA, Y. & KANNO, J. 2013. Metameric pattern of intervertebral disc/vertebral body is  
686 generated independently of Mesp2/Ripply-mediated rostro-caudal patterning of somites in  
687 the mouse embryo. *Dev Biol*, 380, 172-84.

- 688 TAN, S. S., CROSSIN, K. L., HOFFMAN, S. & EDELMAN, G. M. 1987. Asymmetric  
689 expression in somites of cytotactin and its proteoglycan ligand is correlated with neural crest  
690 cell distribution. *Proc Natl Acad Sci U S A*, 84, 7977-81.
- 691 TANAKA, T. & UHTHOFF, H. K. 1981. Significance of resegmentation in the pathogenesis of  
692 vertebral body malformation. *Acta Orthop Scand*, 52, 331-8.
- 693 VON EBNER, V. 1888. Urwirbel und Neugliederung der Wirbelsäule. *Sitzungsber Akad Wiss*  
694 *Wien*, 97, 194-206.
- 695 WARD, L., EVANS, S. E. & STERN, C. D. 2017. A resegmentation-shift model for vertebral  
696 patterning. *J Anat*, 230, 290-296.
- 697 WILLIAMS, S., ALKHATIB, B. & SERRA, R. 2019. Development of the axial skeleton and  
698 intervertebral disc.
- 699 YALCIN, H. C., SHEKHAR, A., RANE, A. A. & BUTCHER, J. T. 2010. An ex-ovo chicken  
700 embryo culture system suitable for imaging and microsurgery applications. *J Vis Exp*.
- 701 ZHANG, Y. E. 2009. Non-Smad pathways in TGF-beta signaling. *Cell Res*, 19, 128-39.  
702  
703



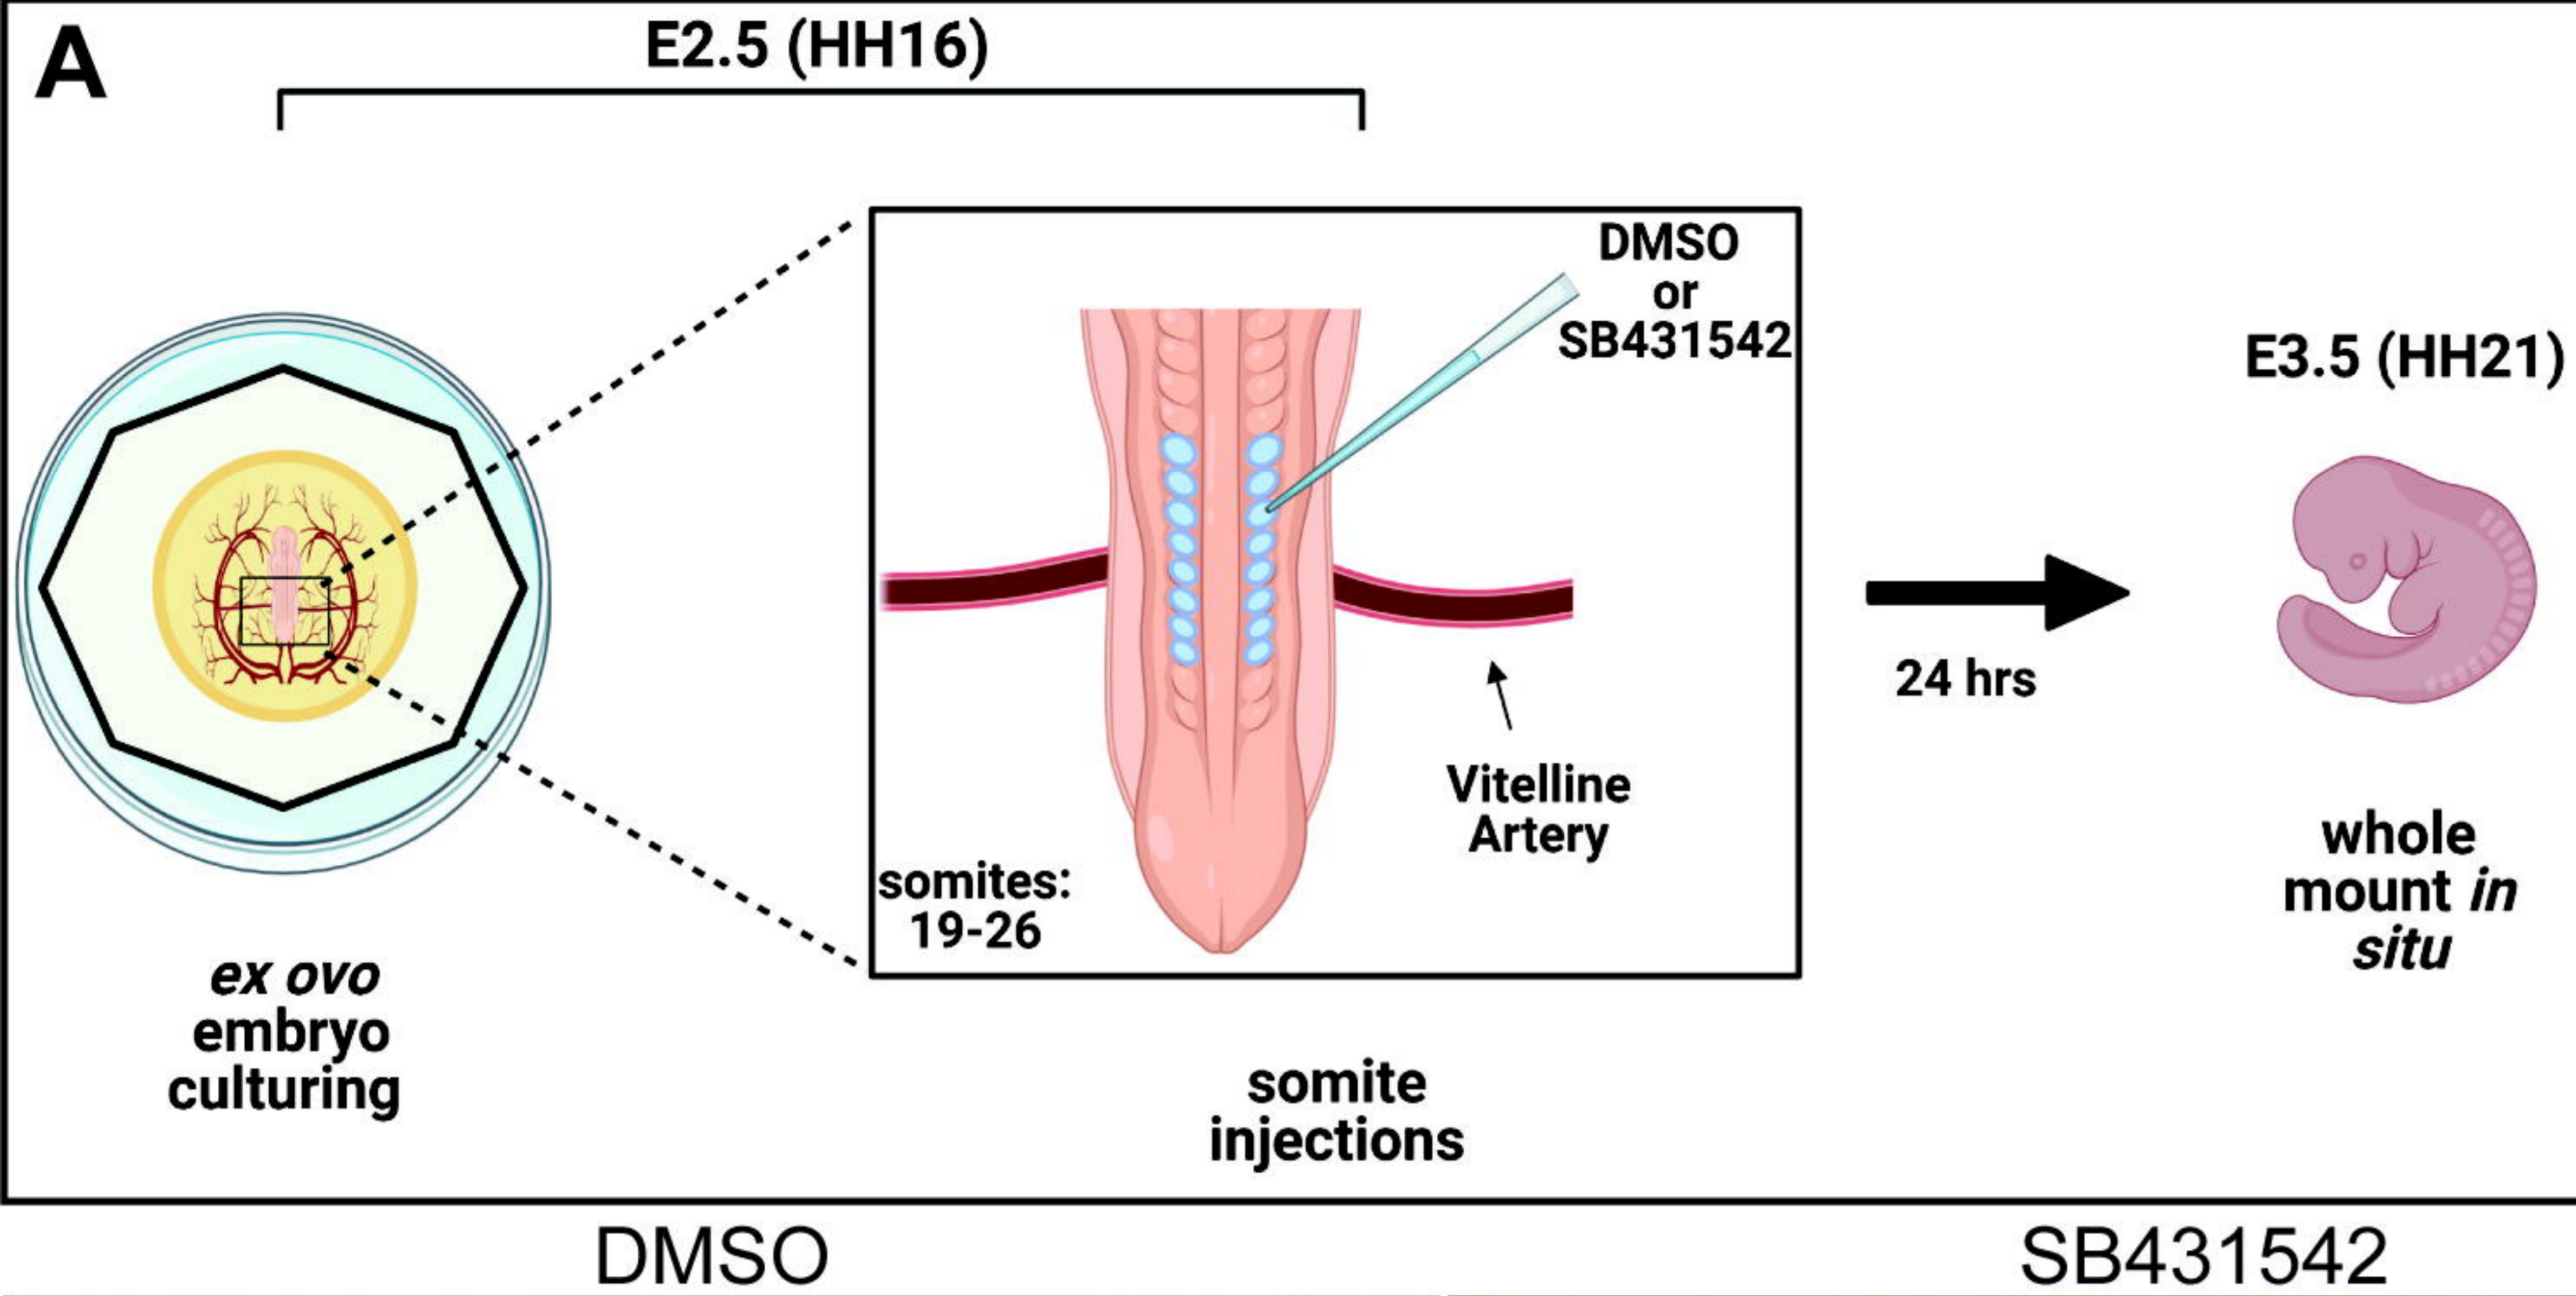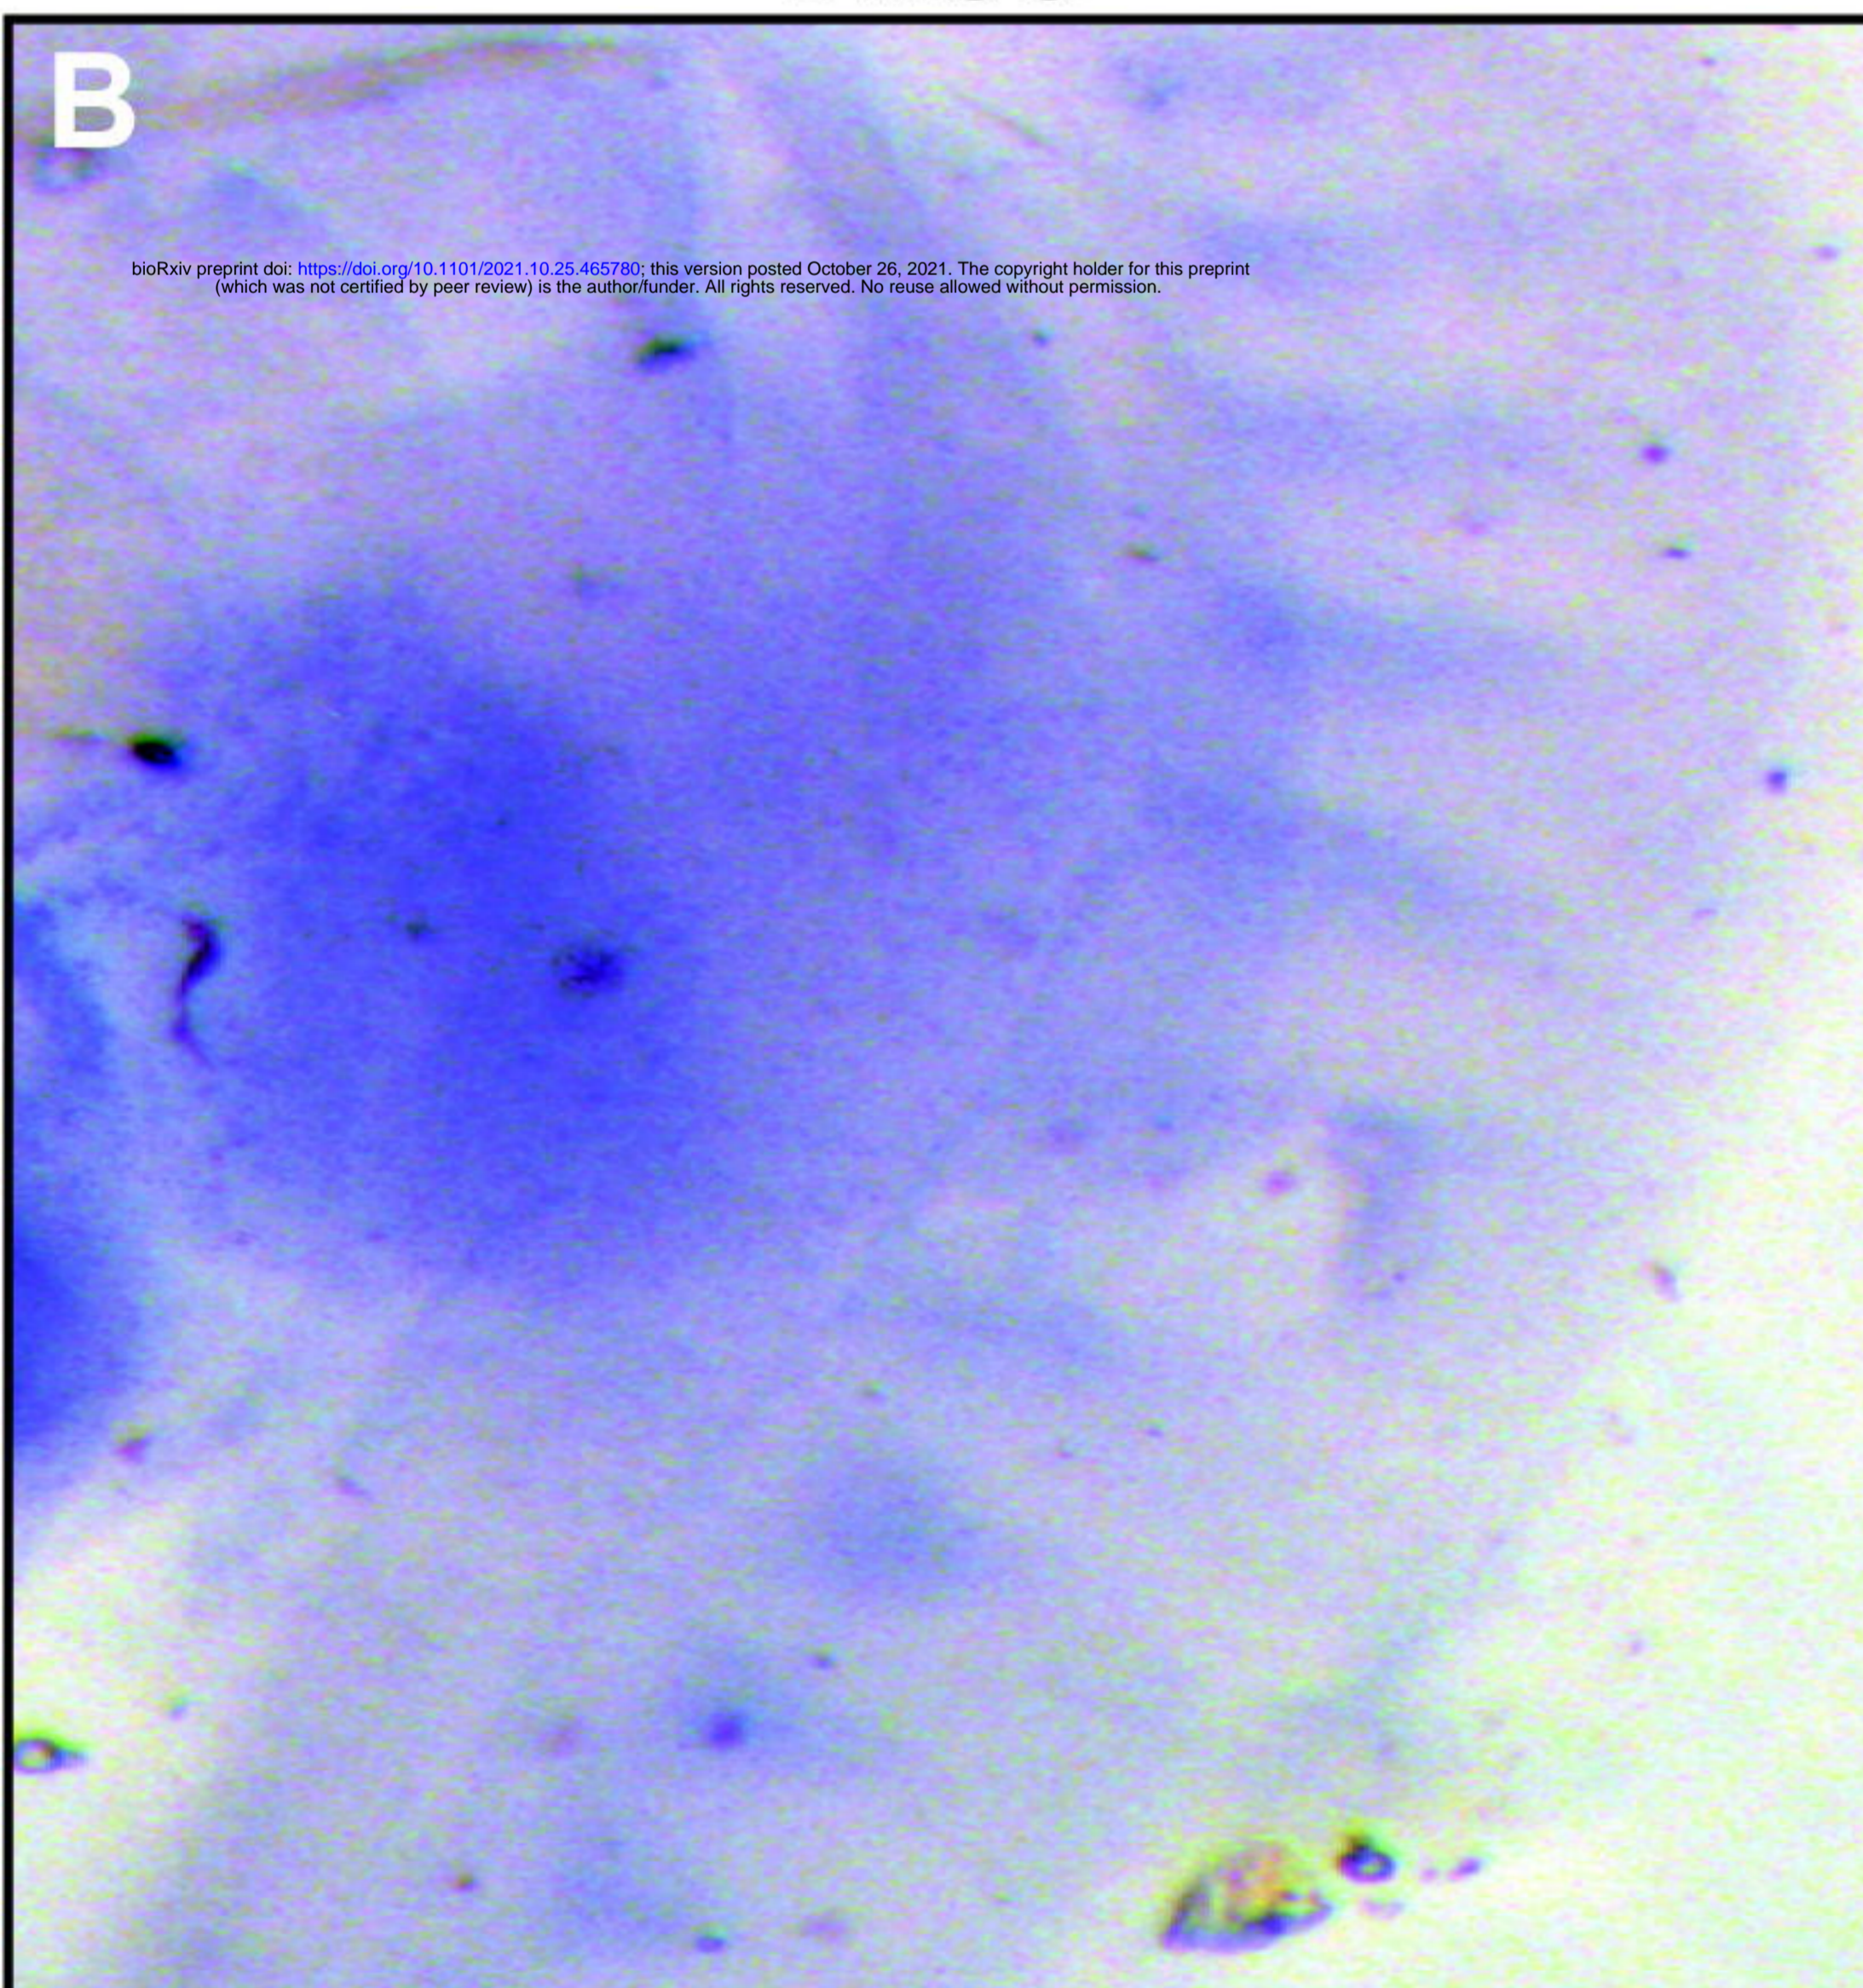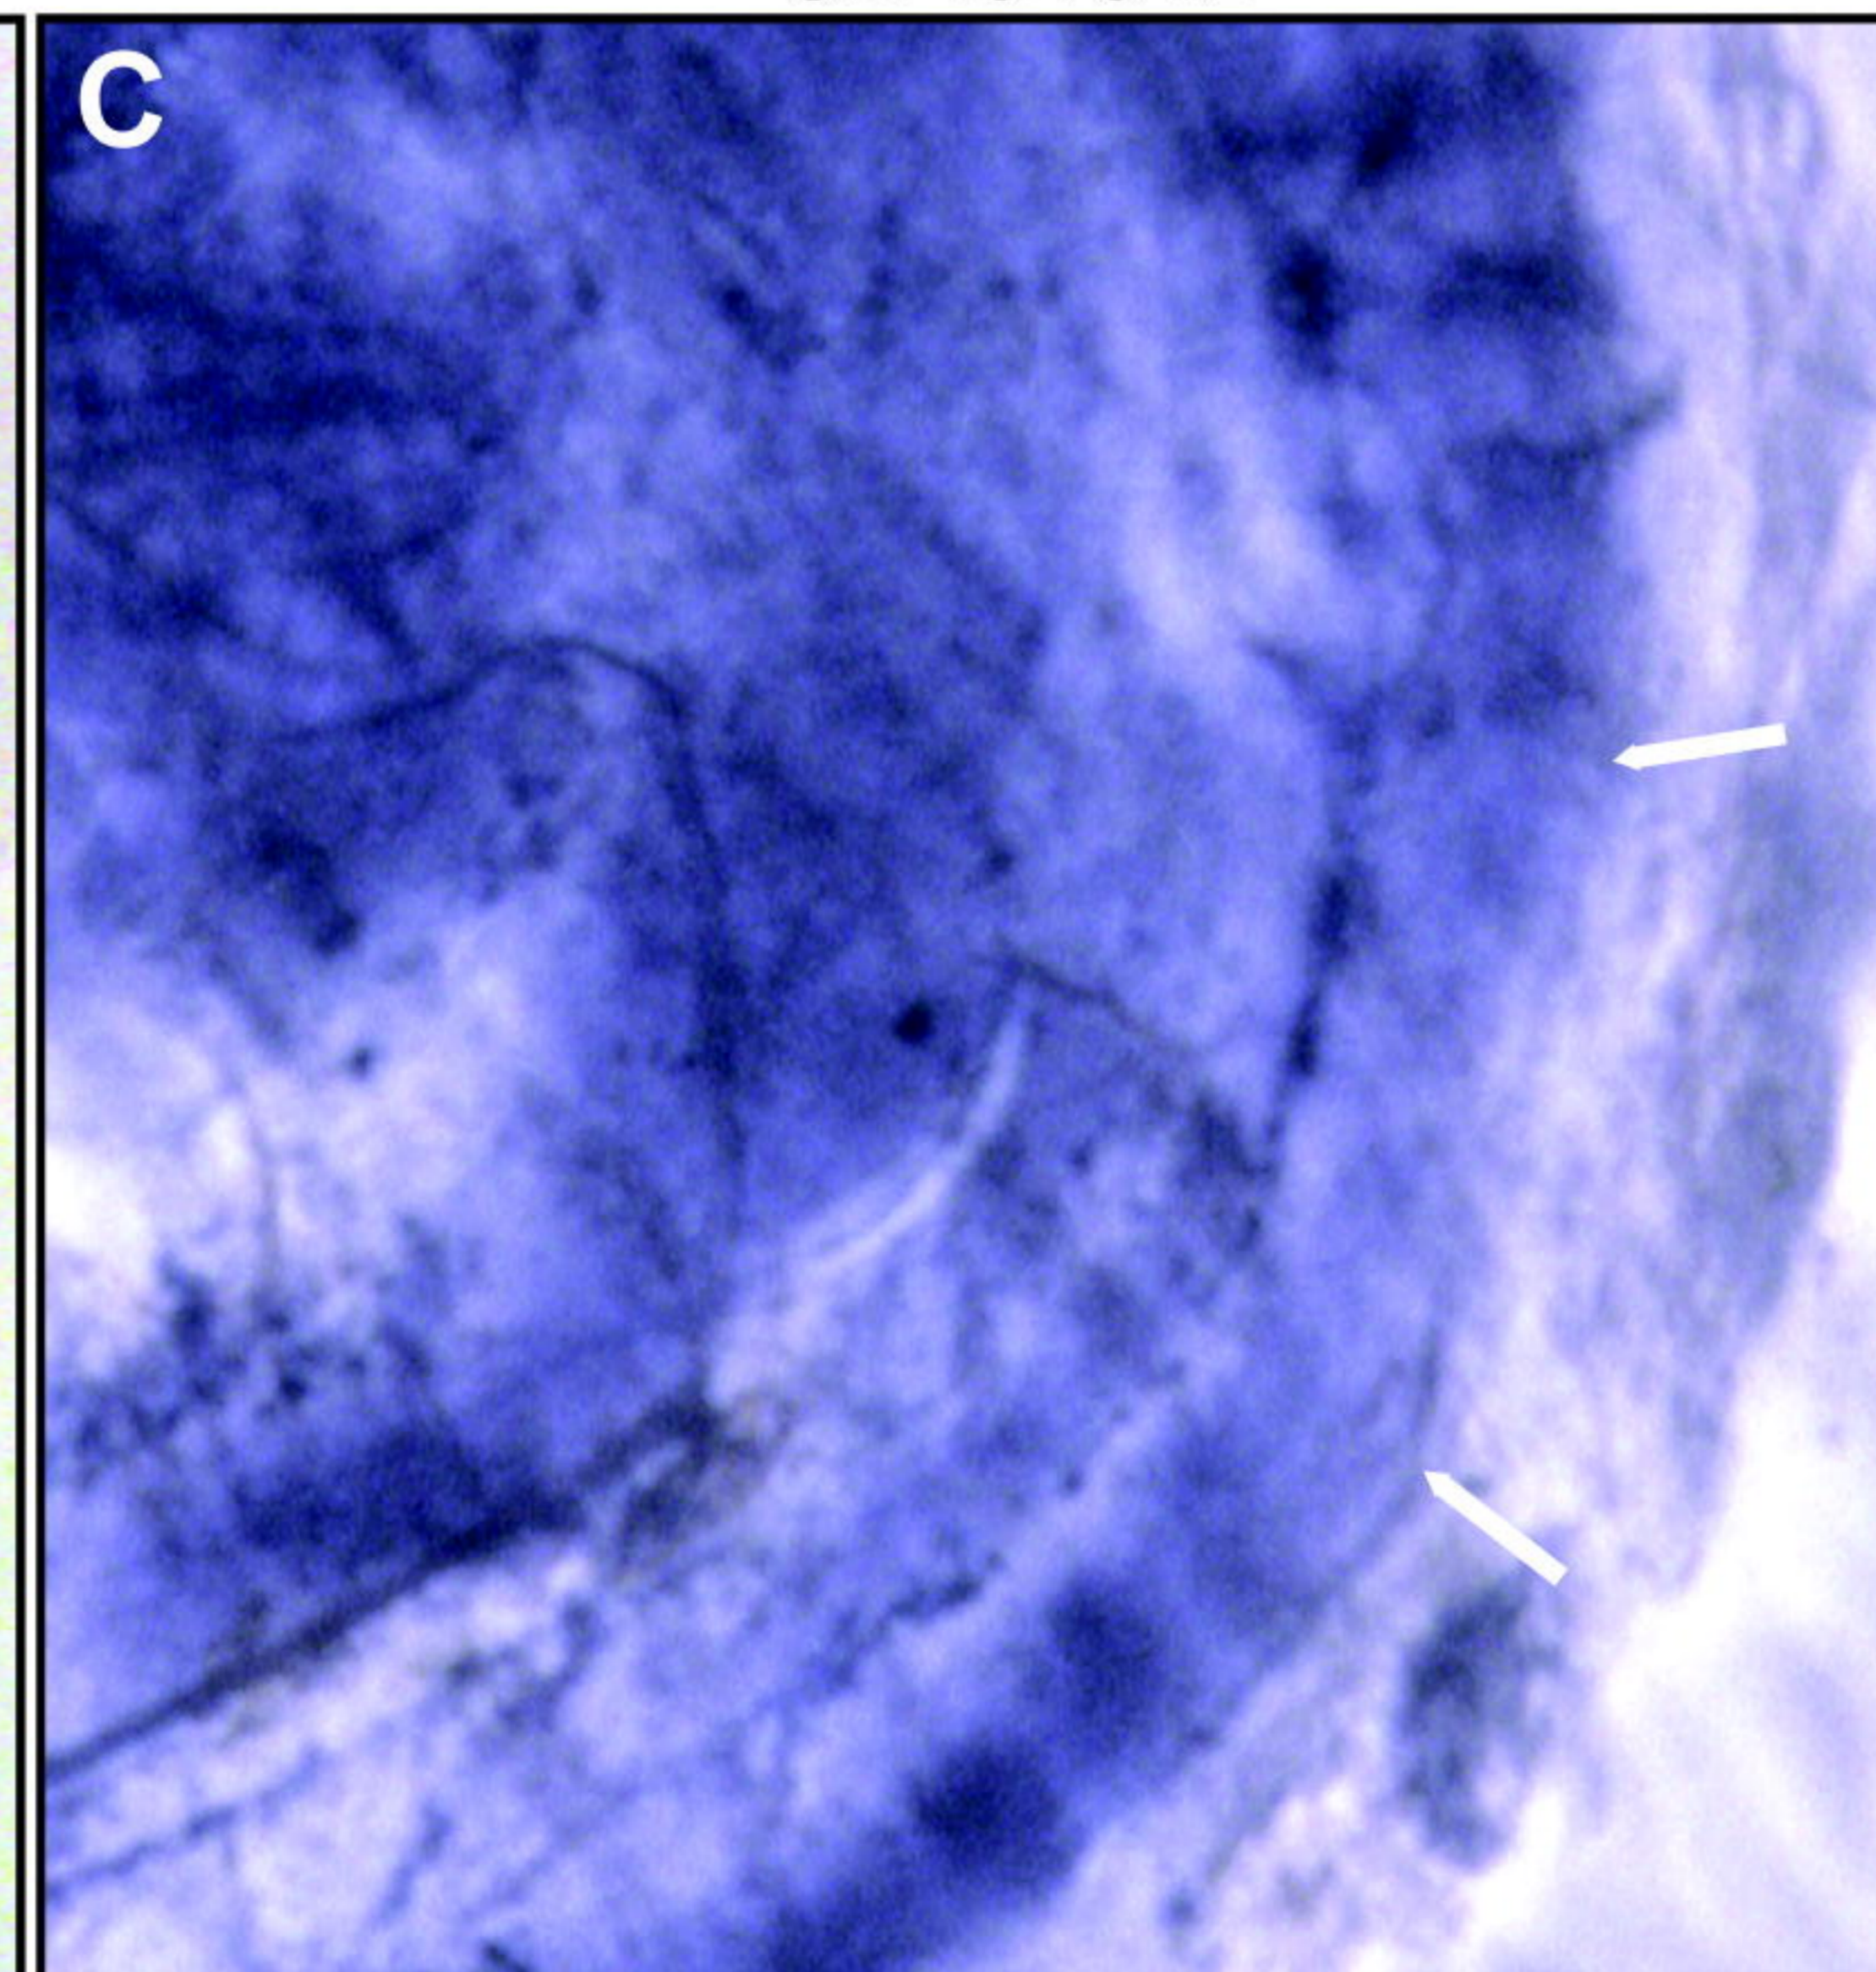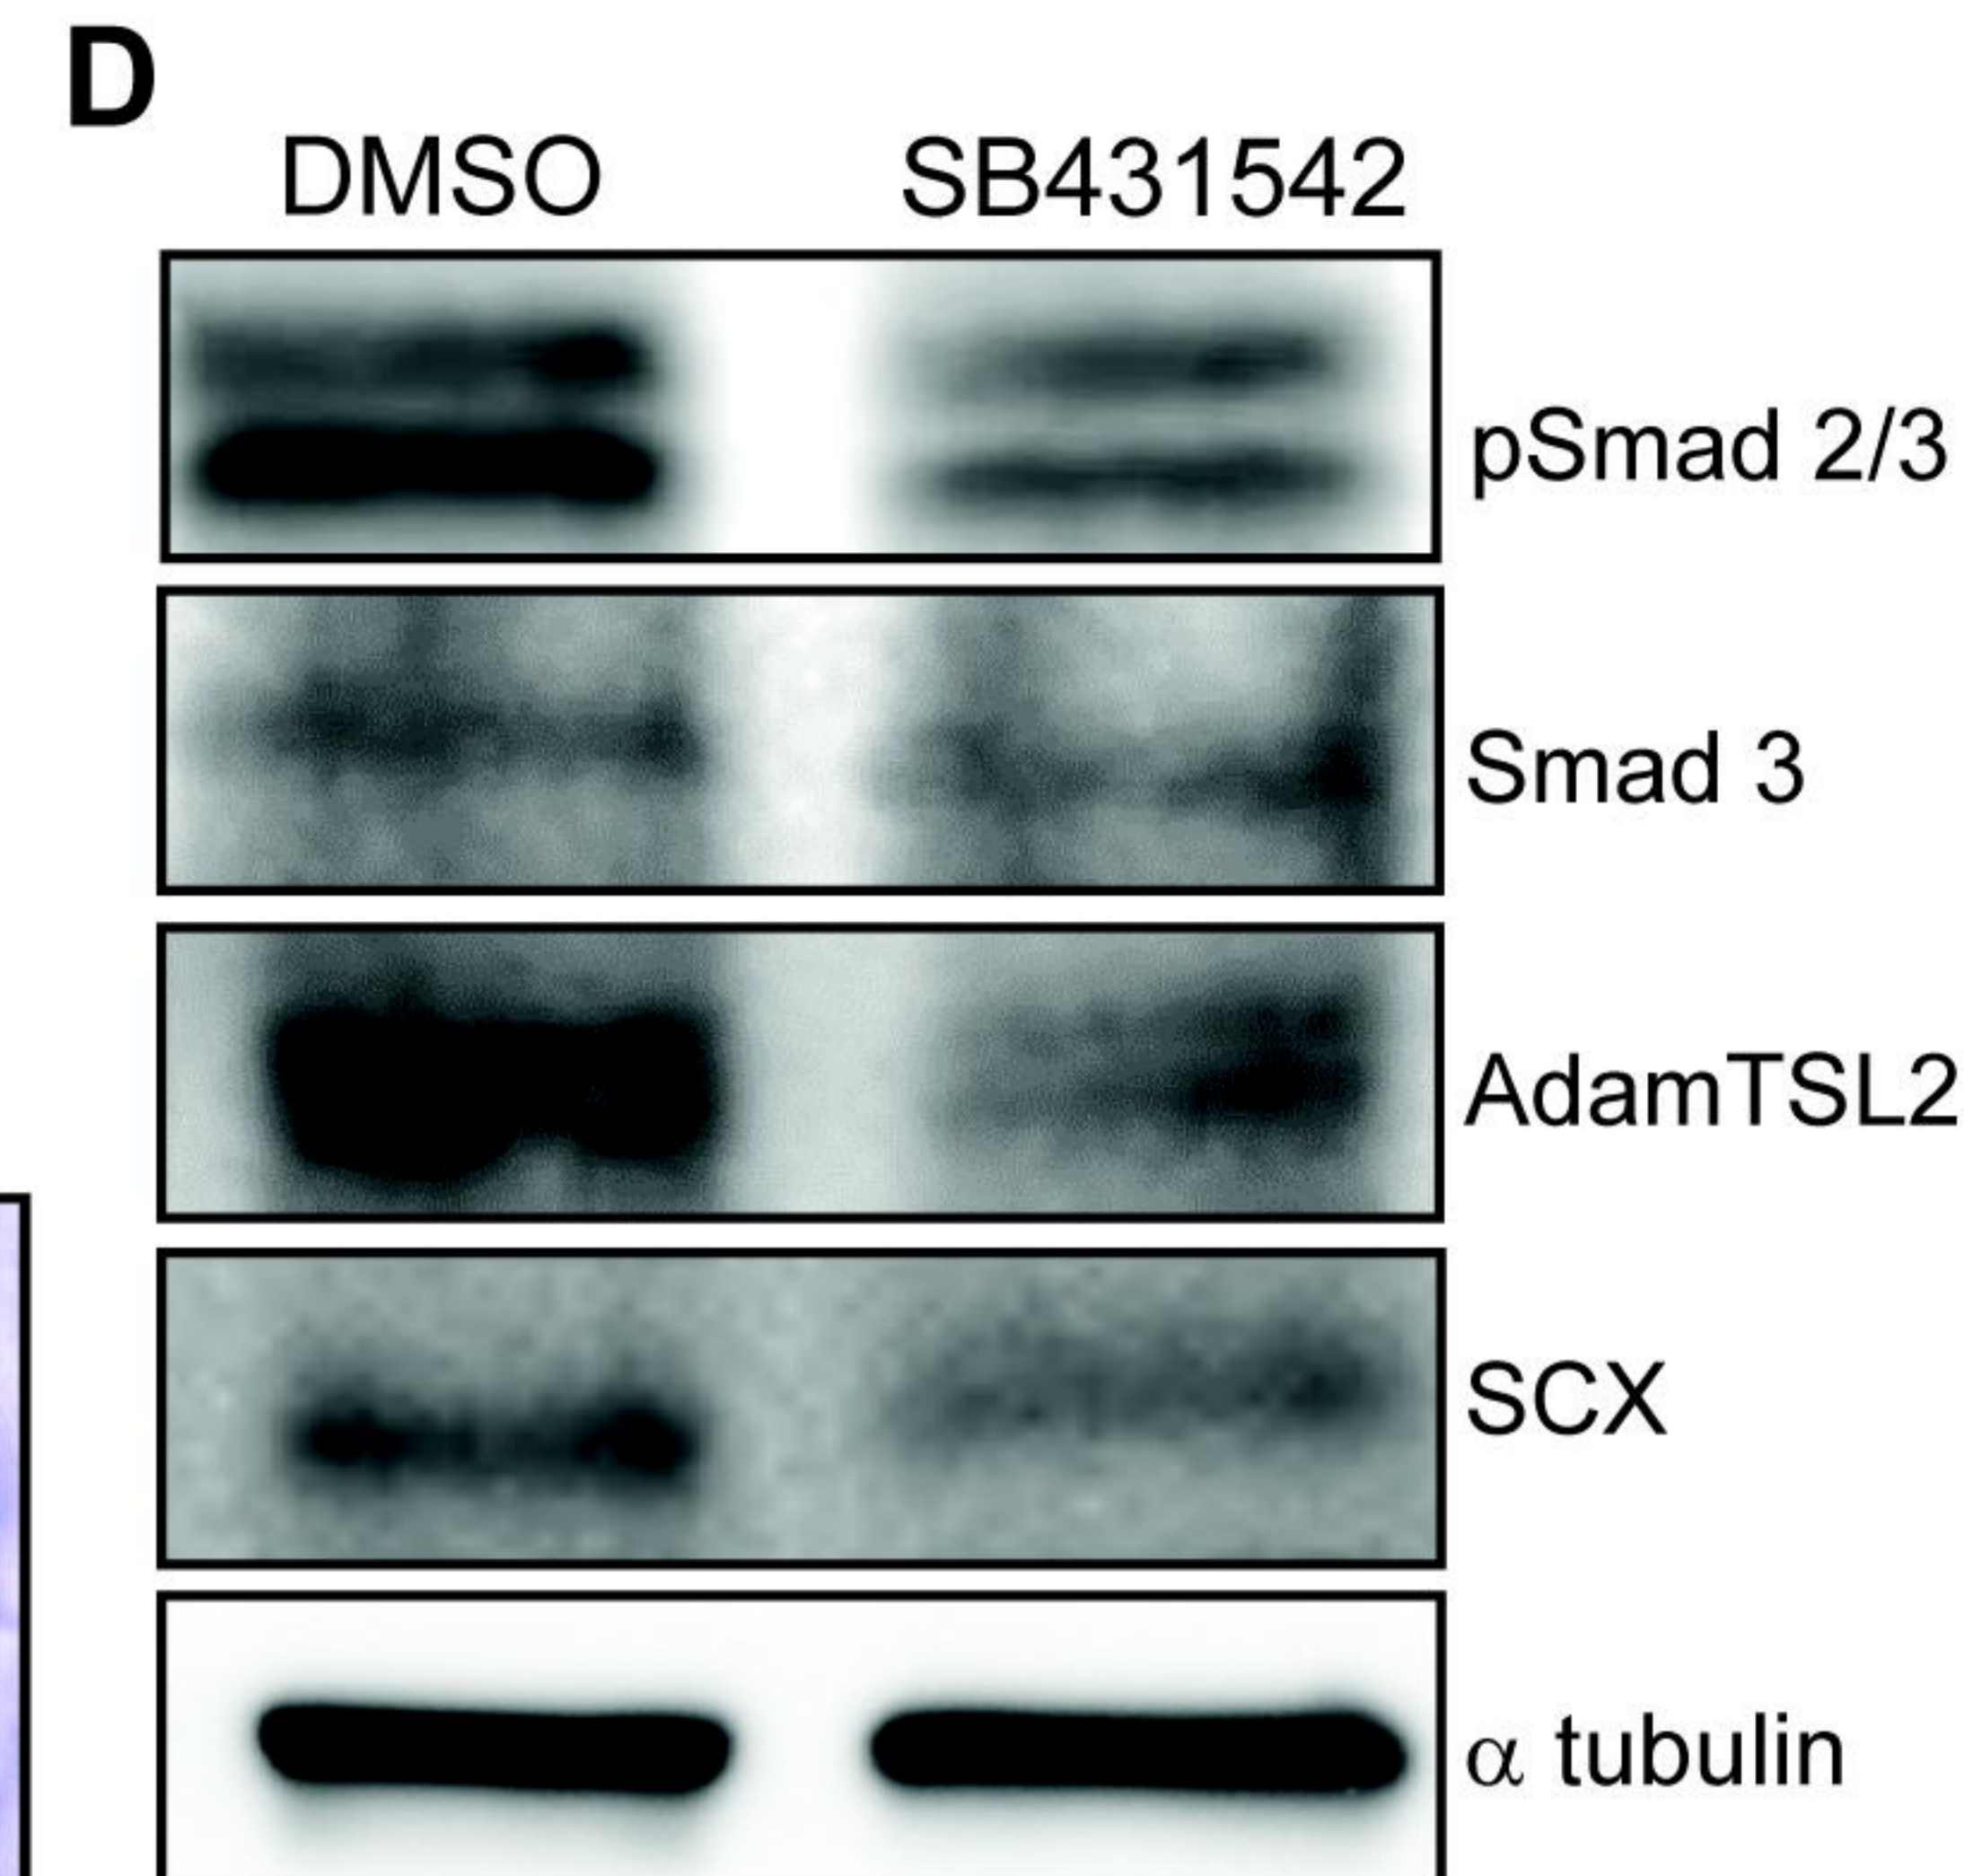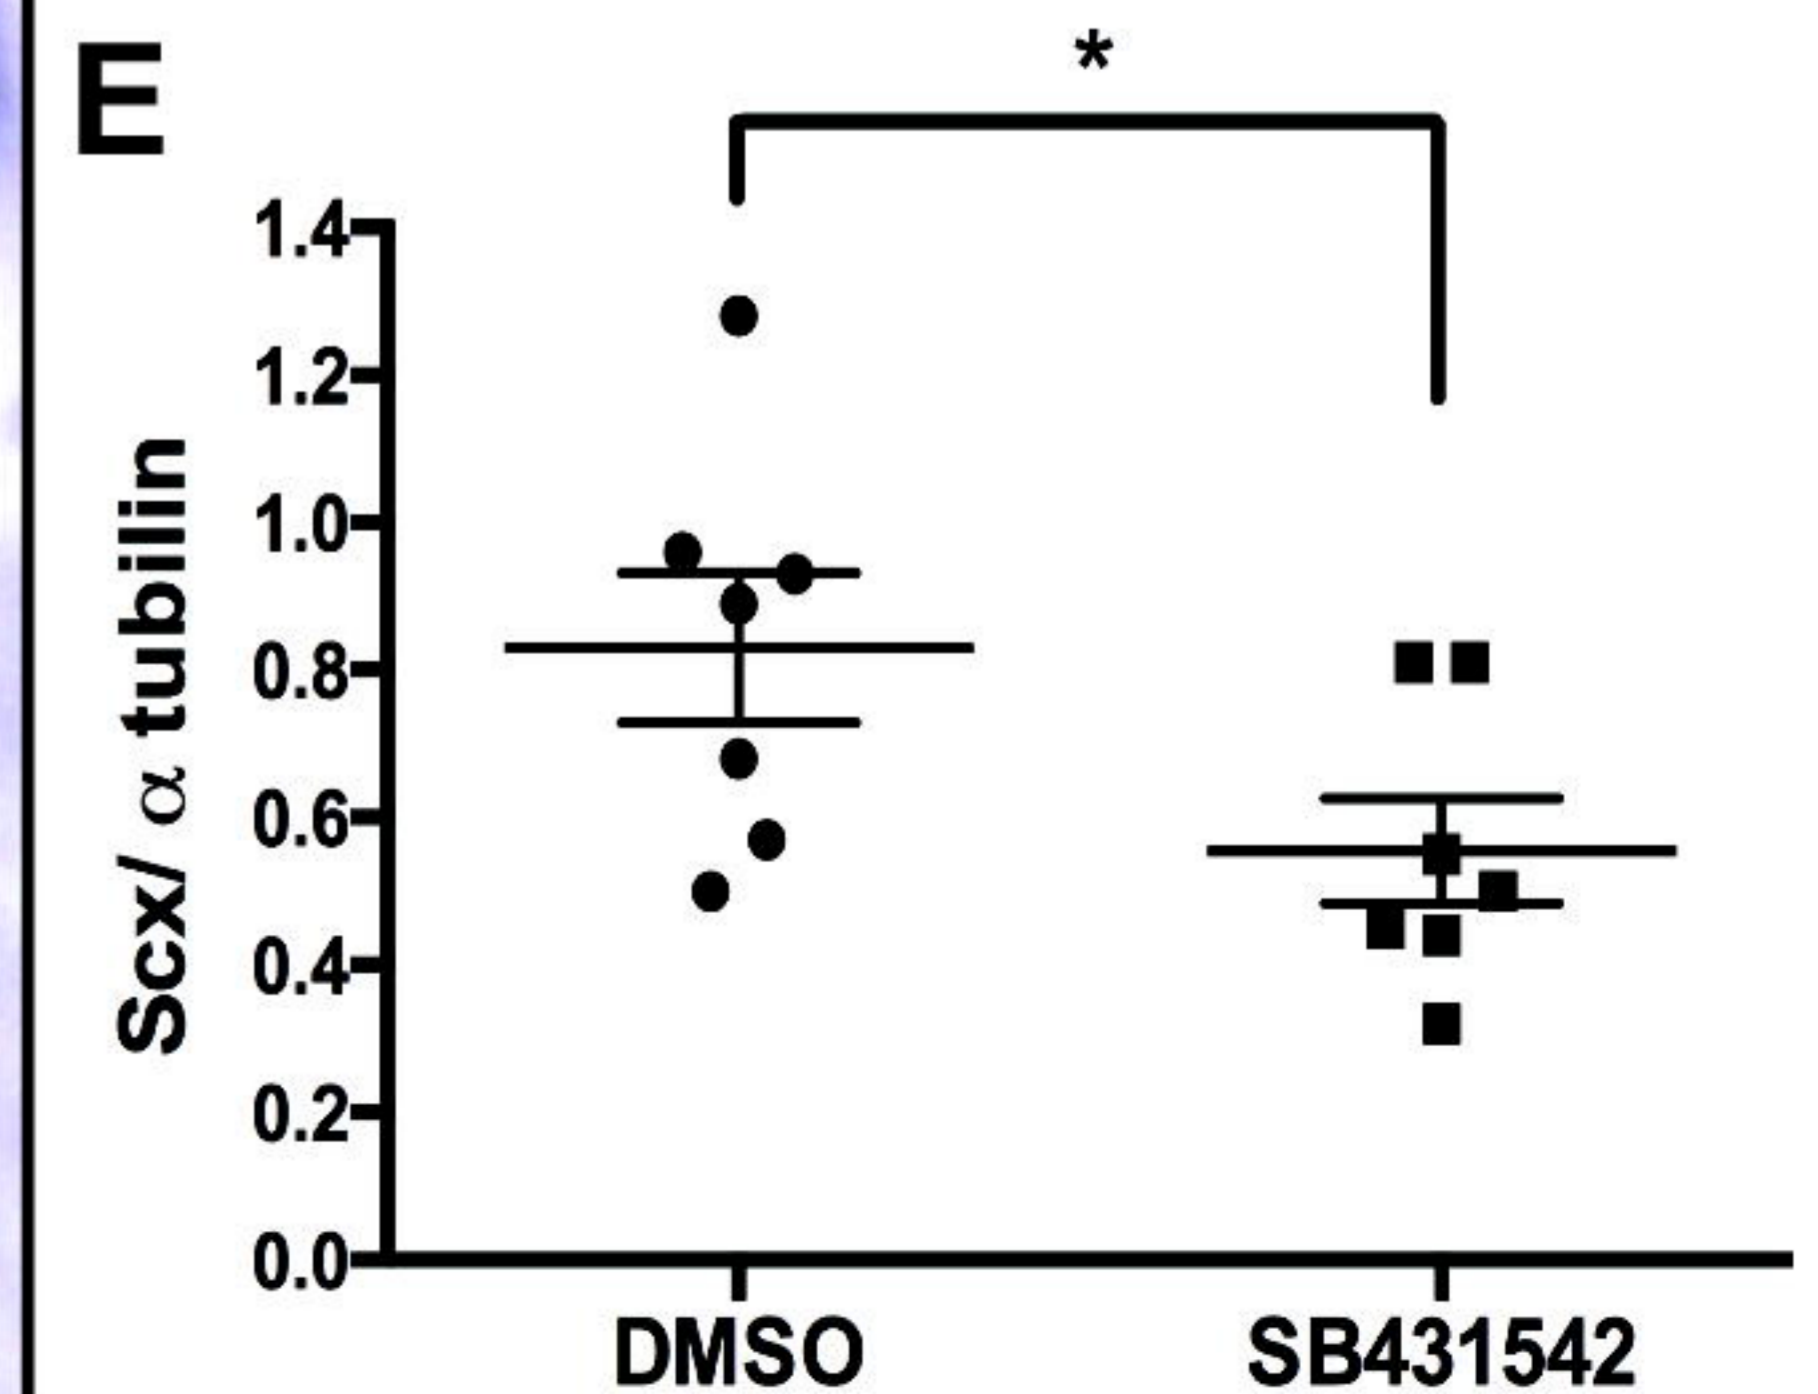



E6.5

DMSO

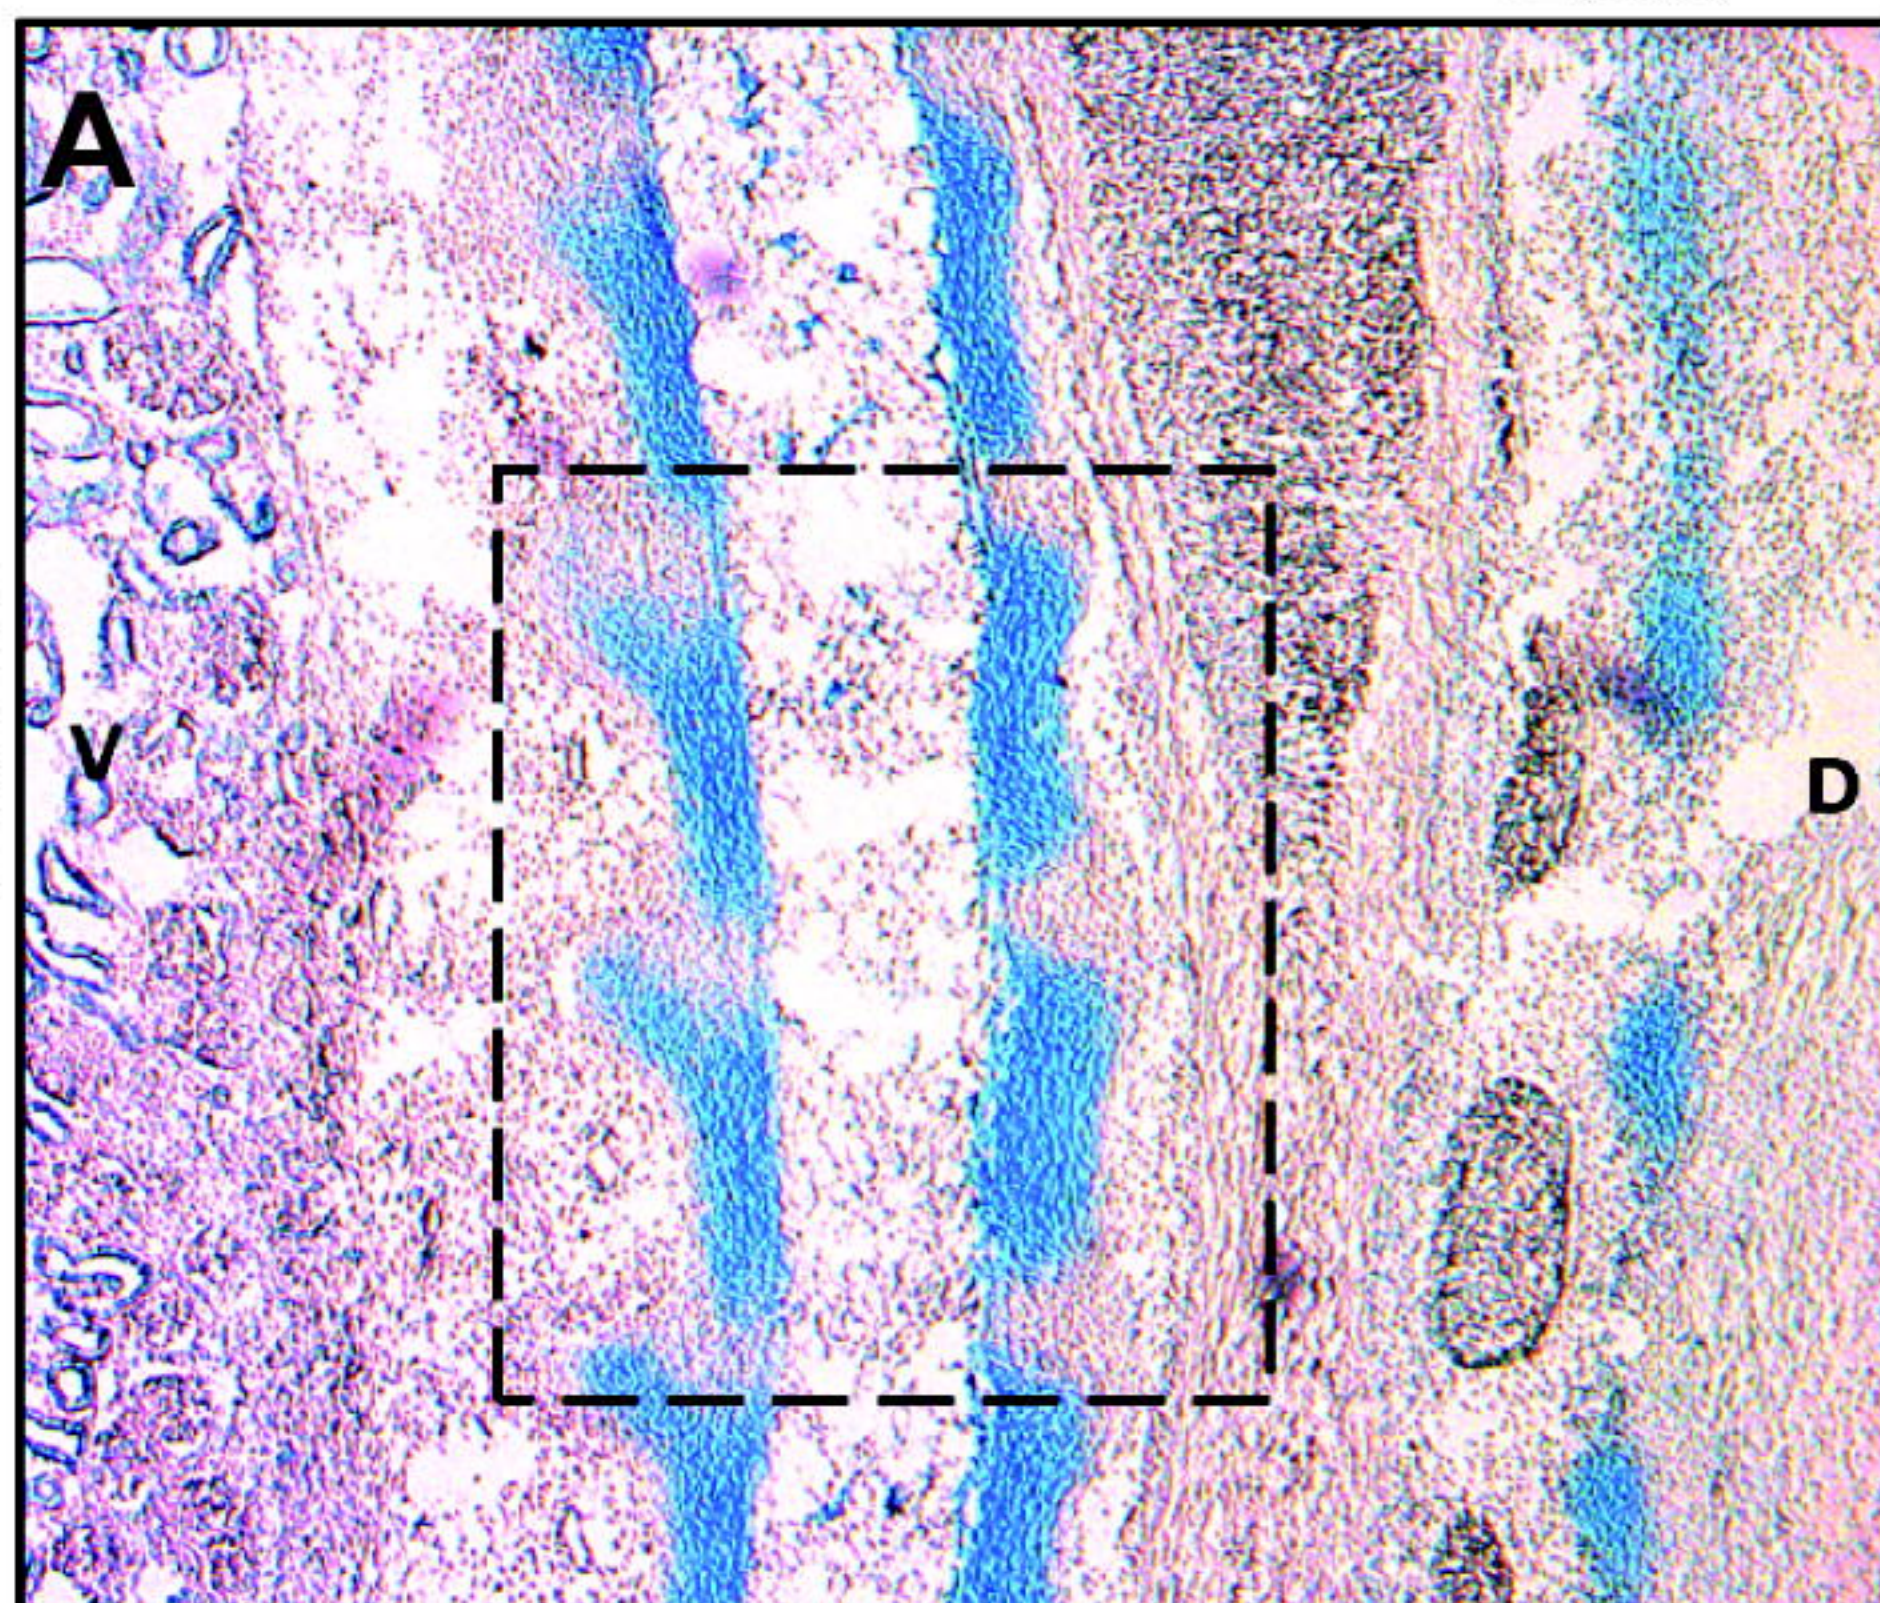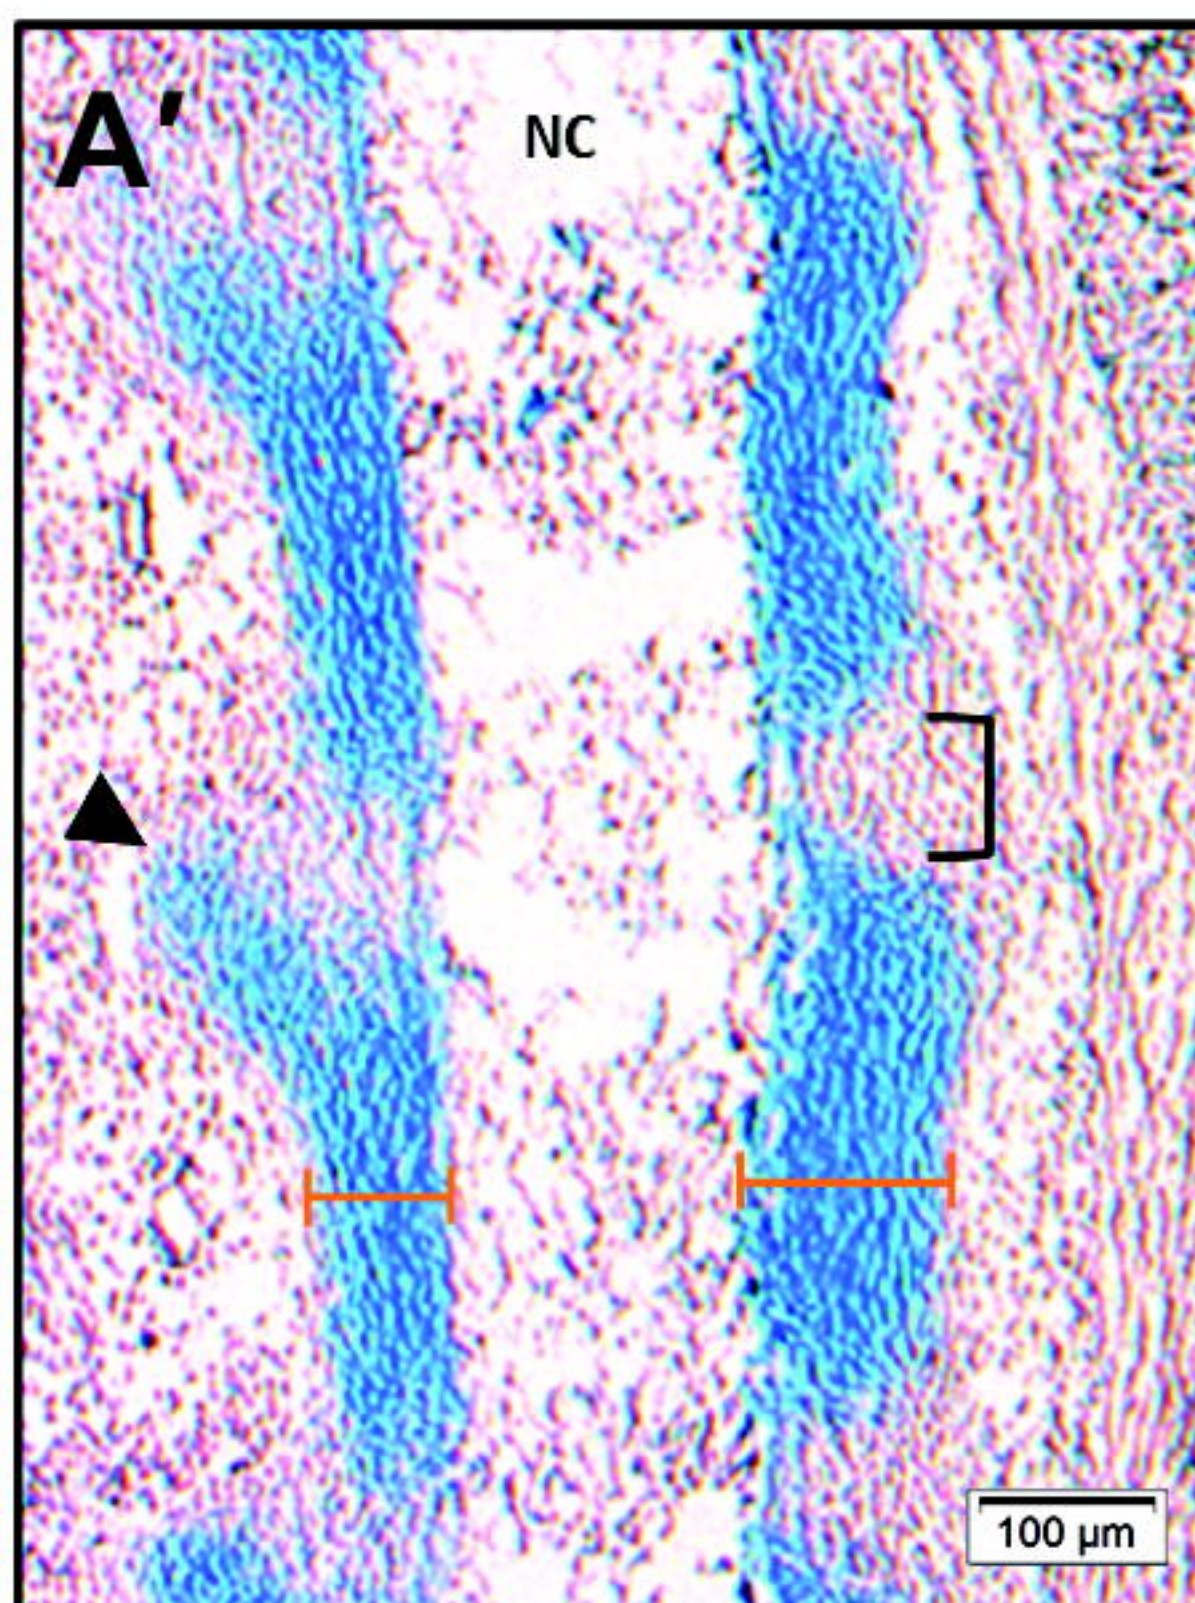

SB431542

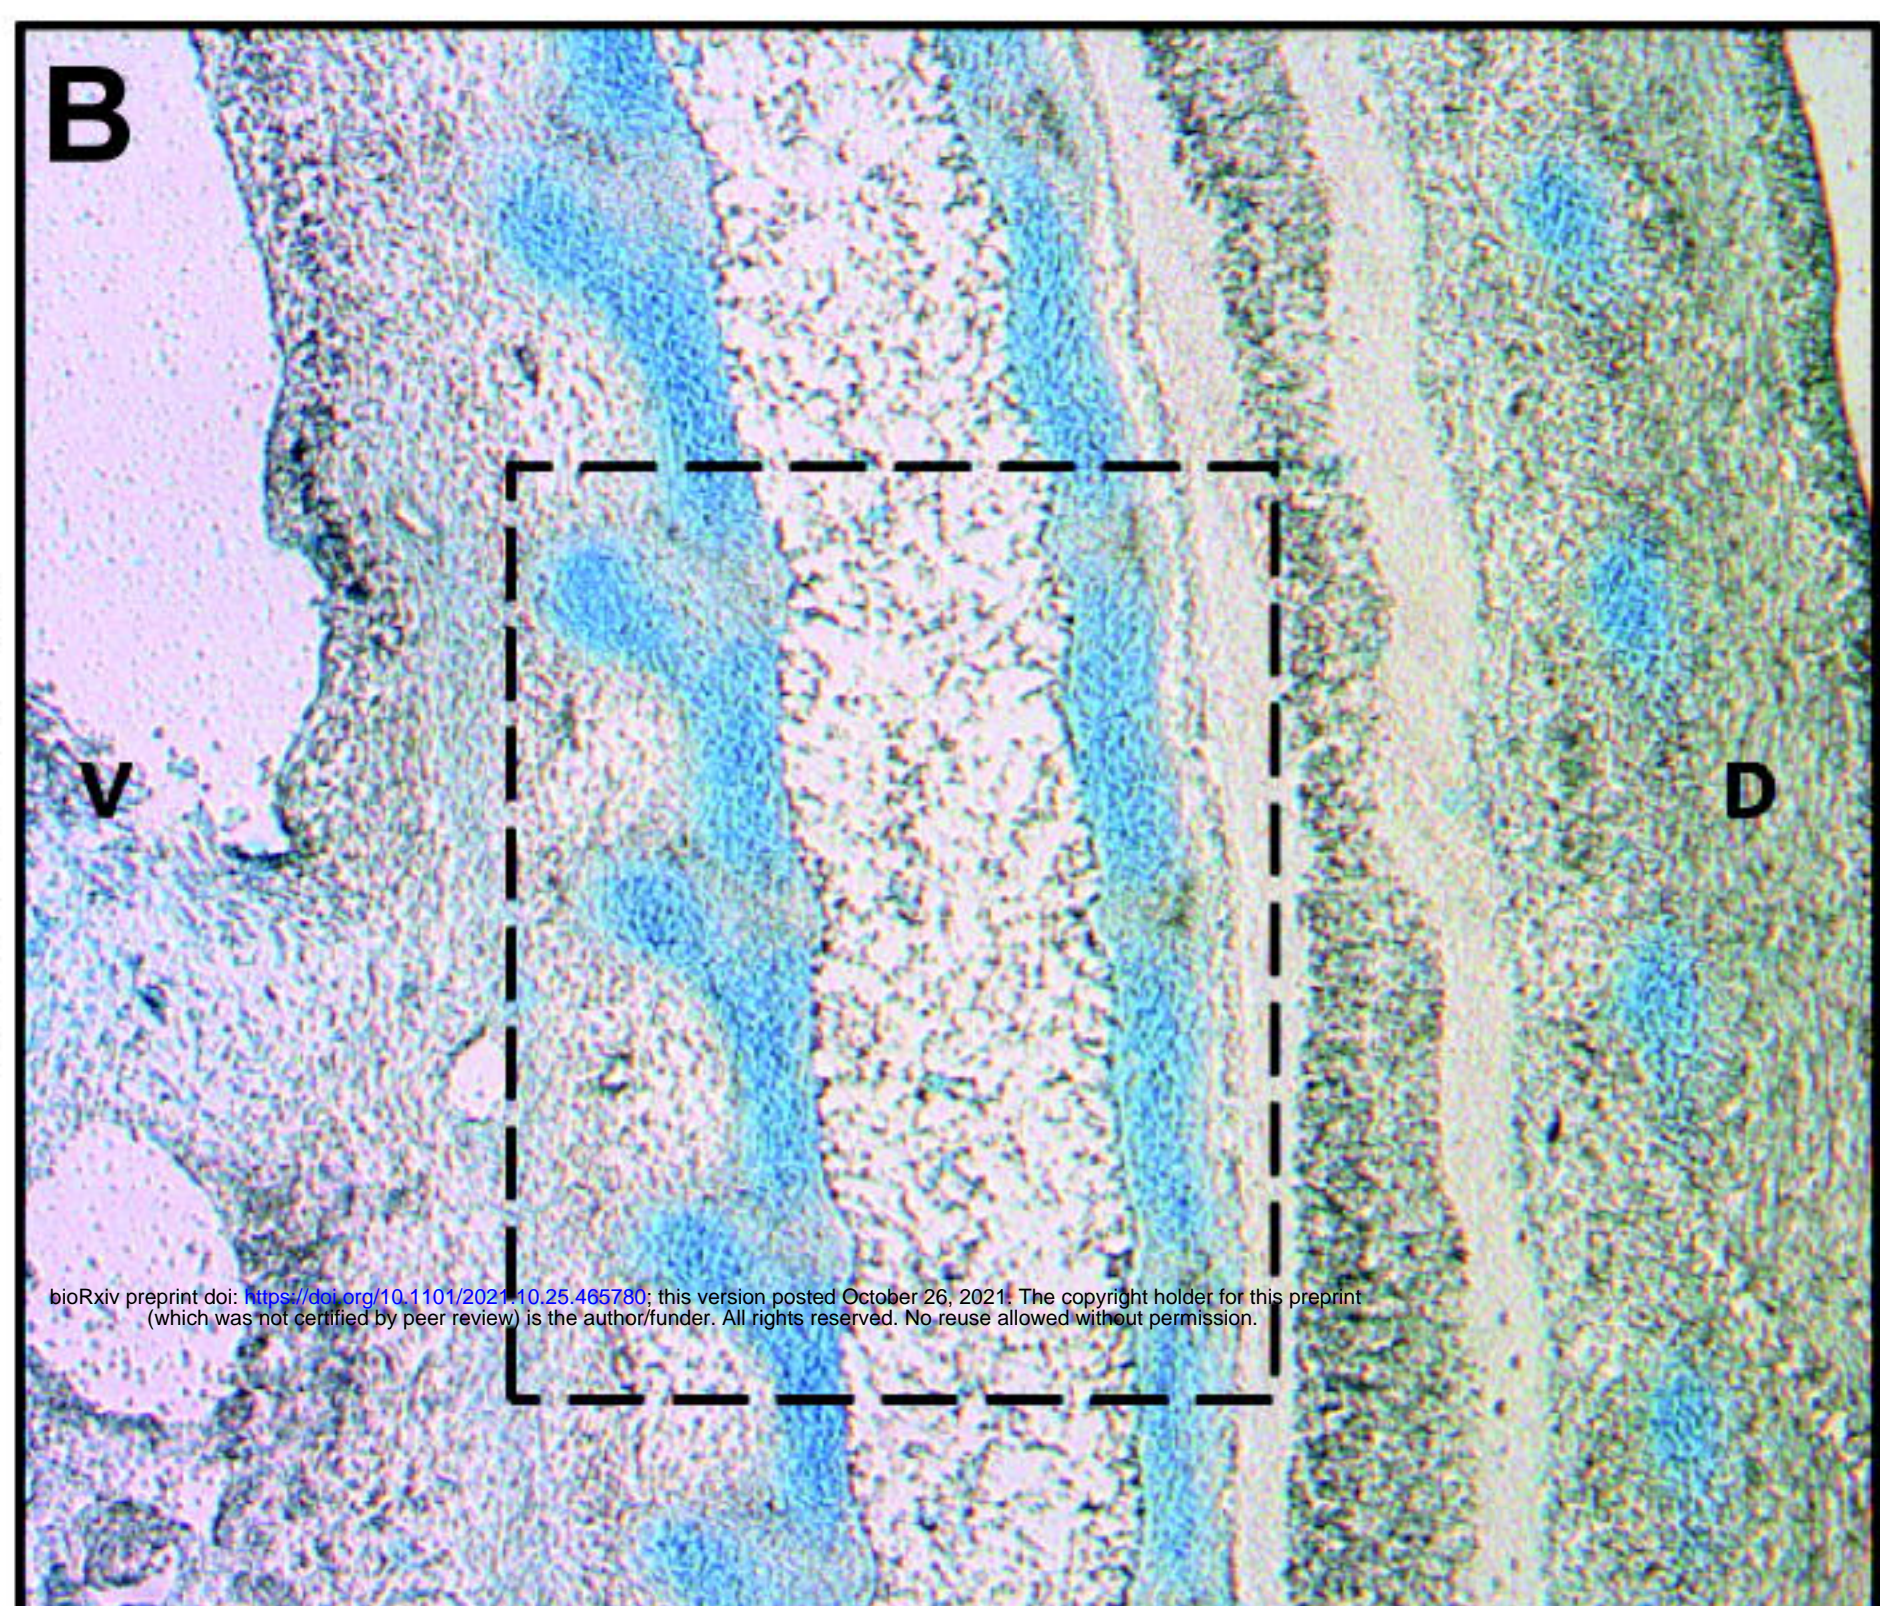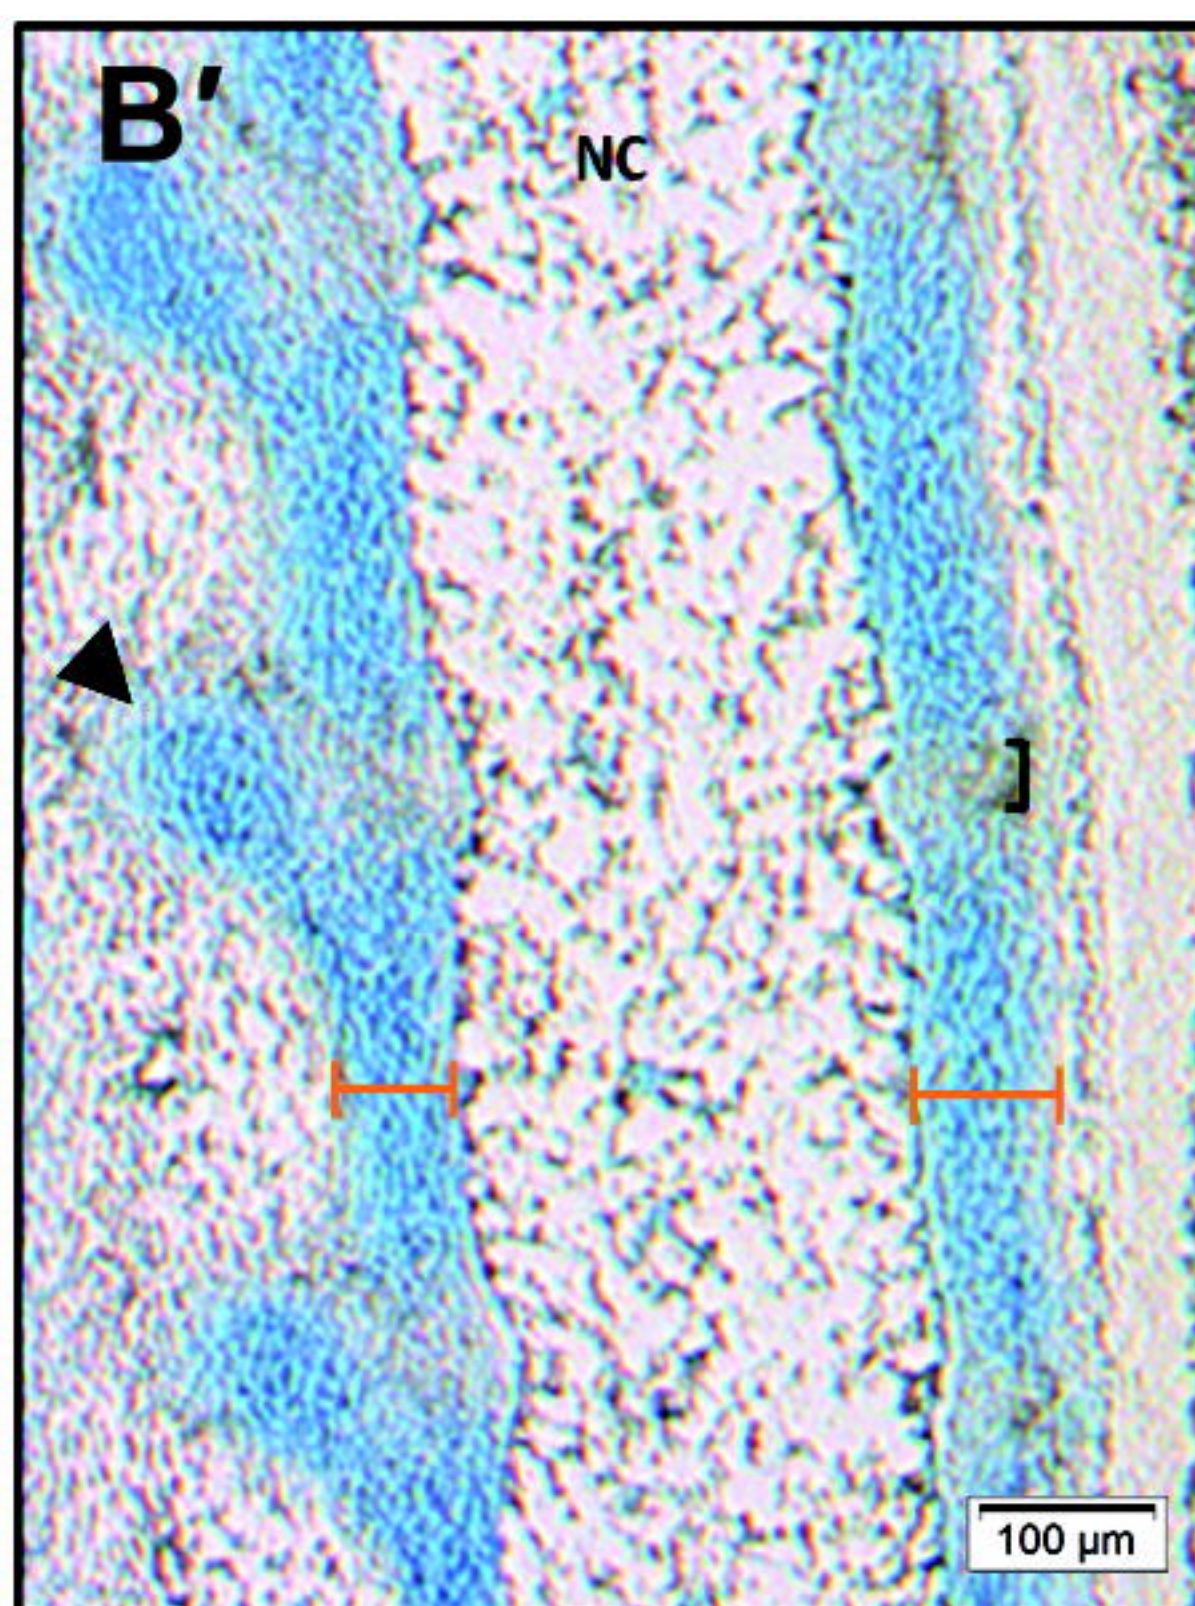

DMSO

SB431542

E12.5

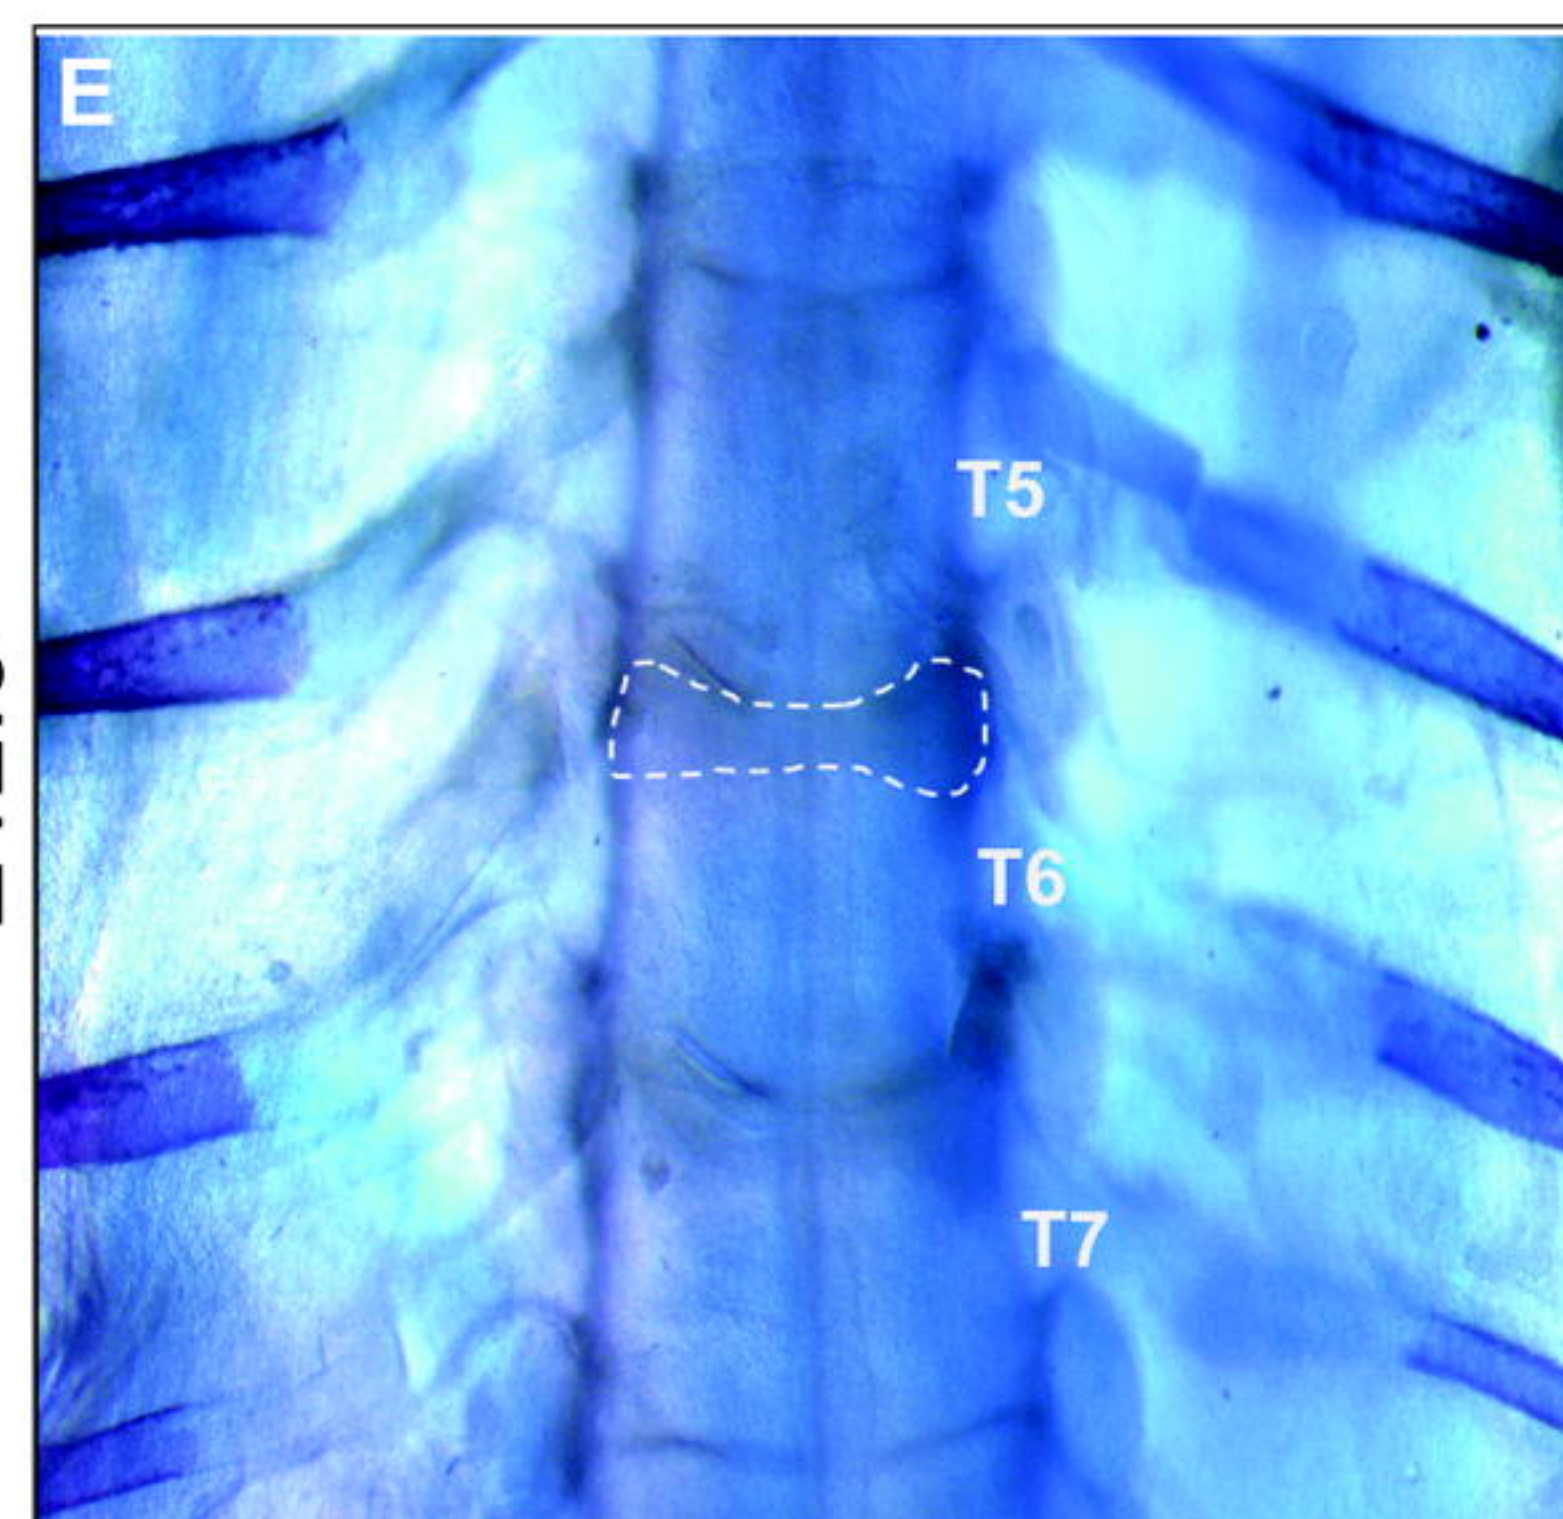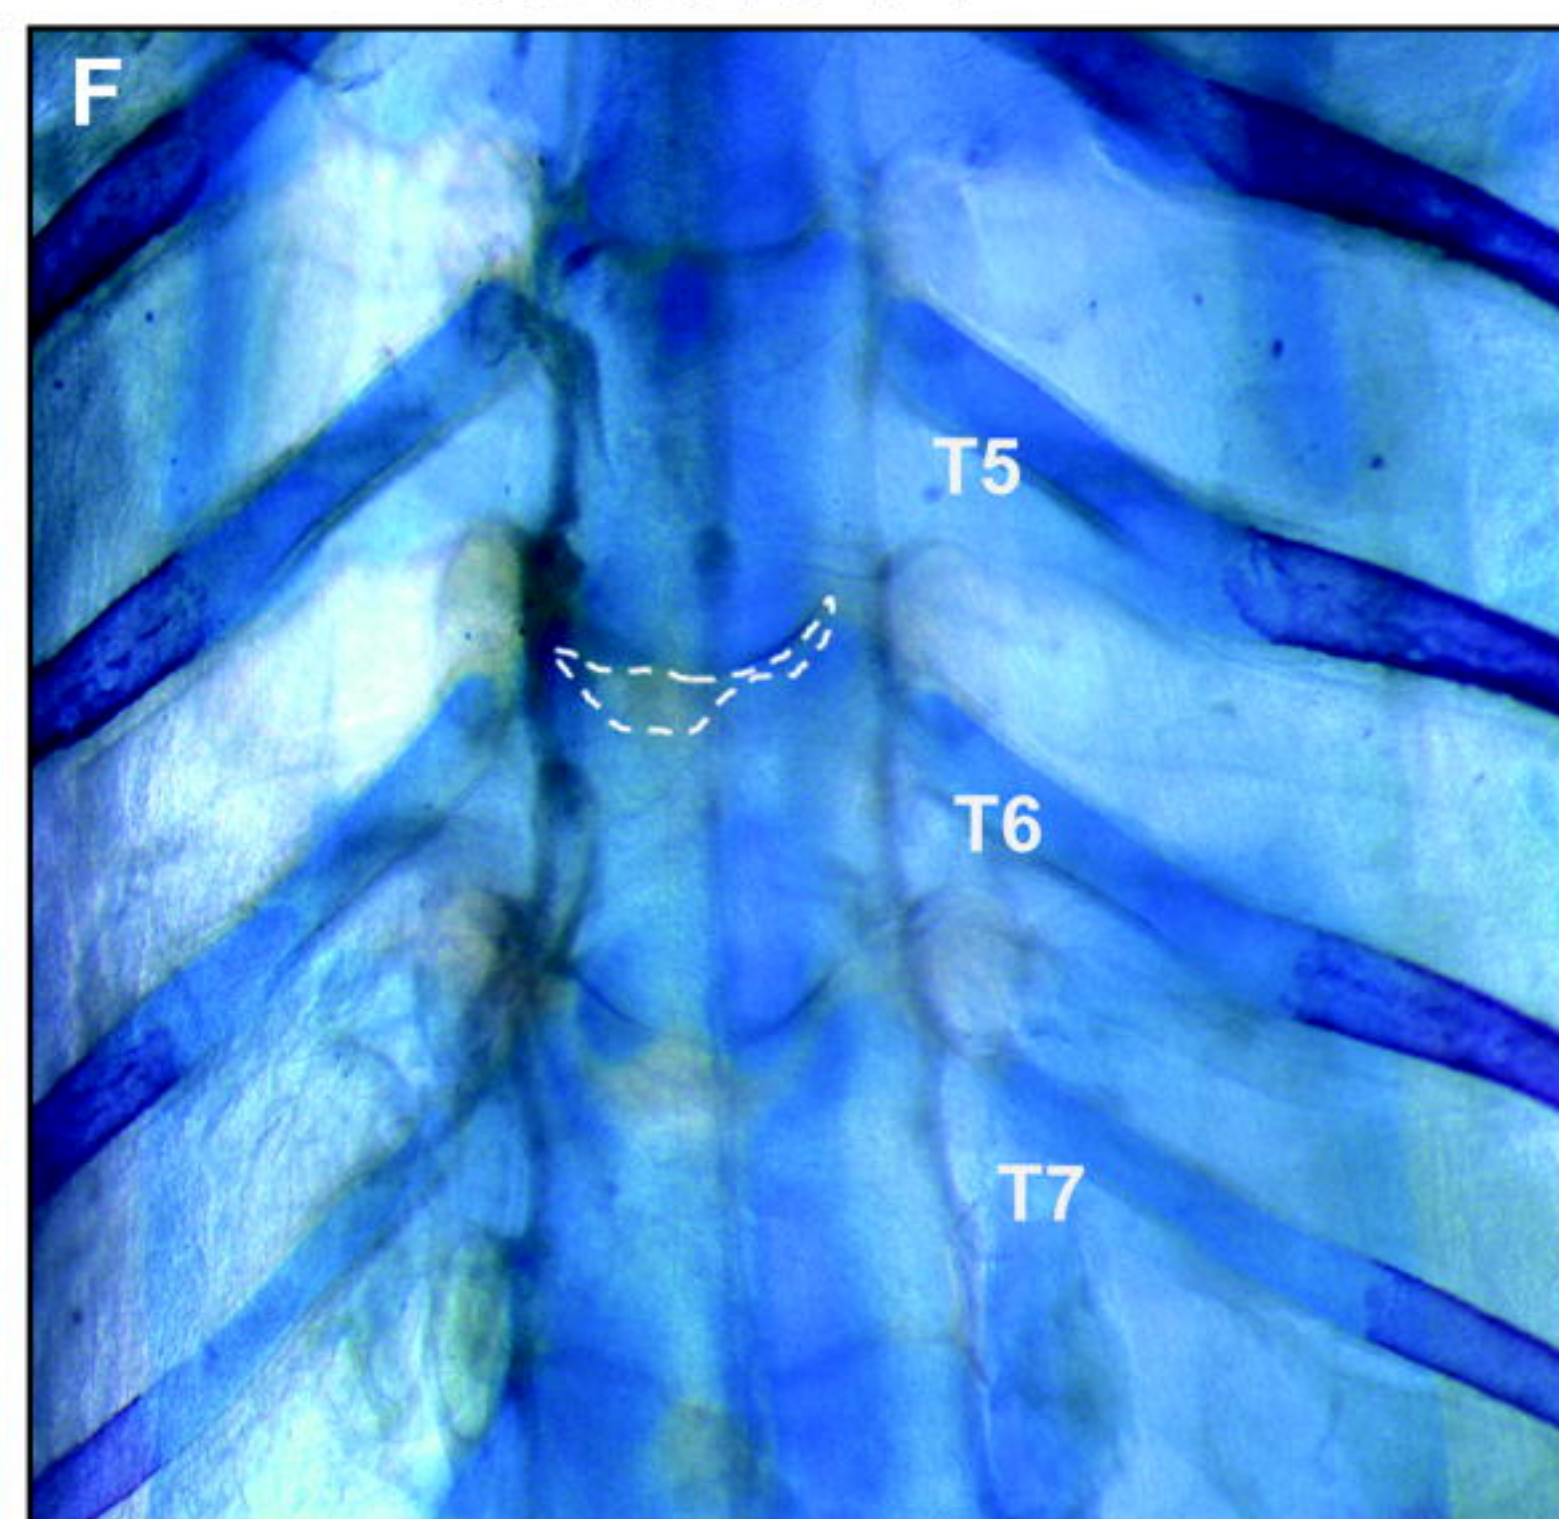

C

VB Wall Thickness (inches)

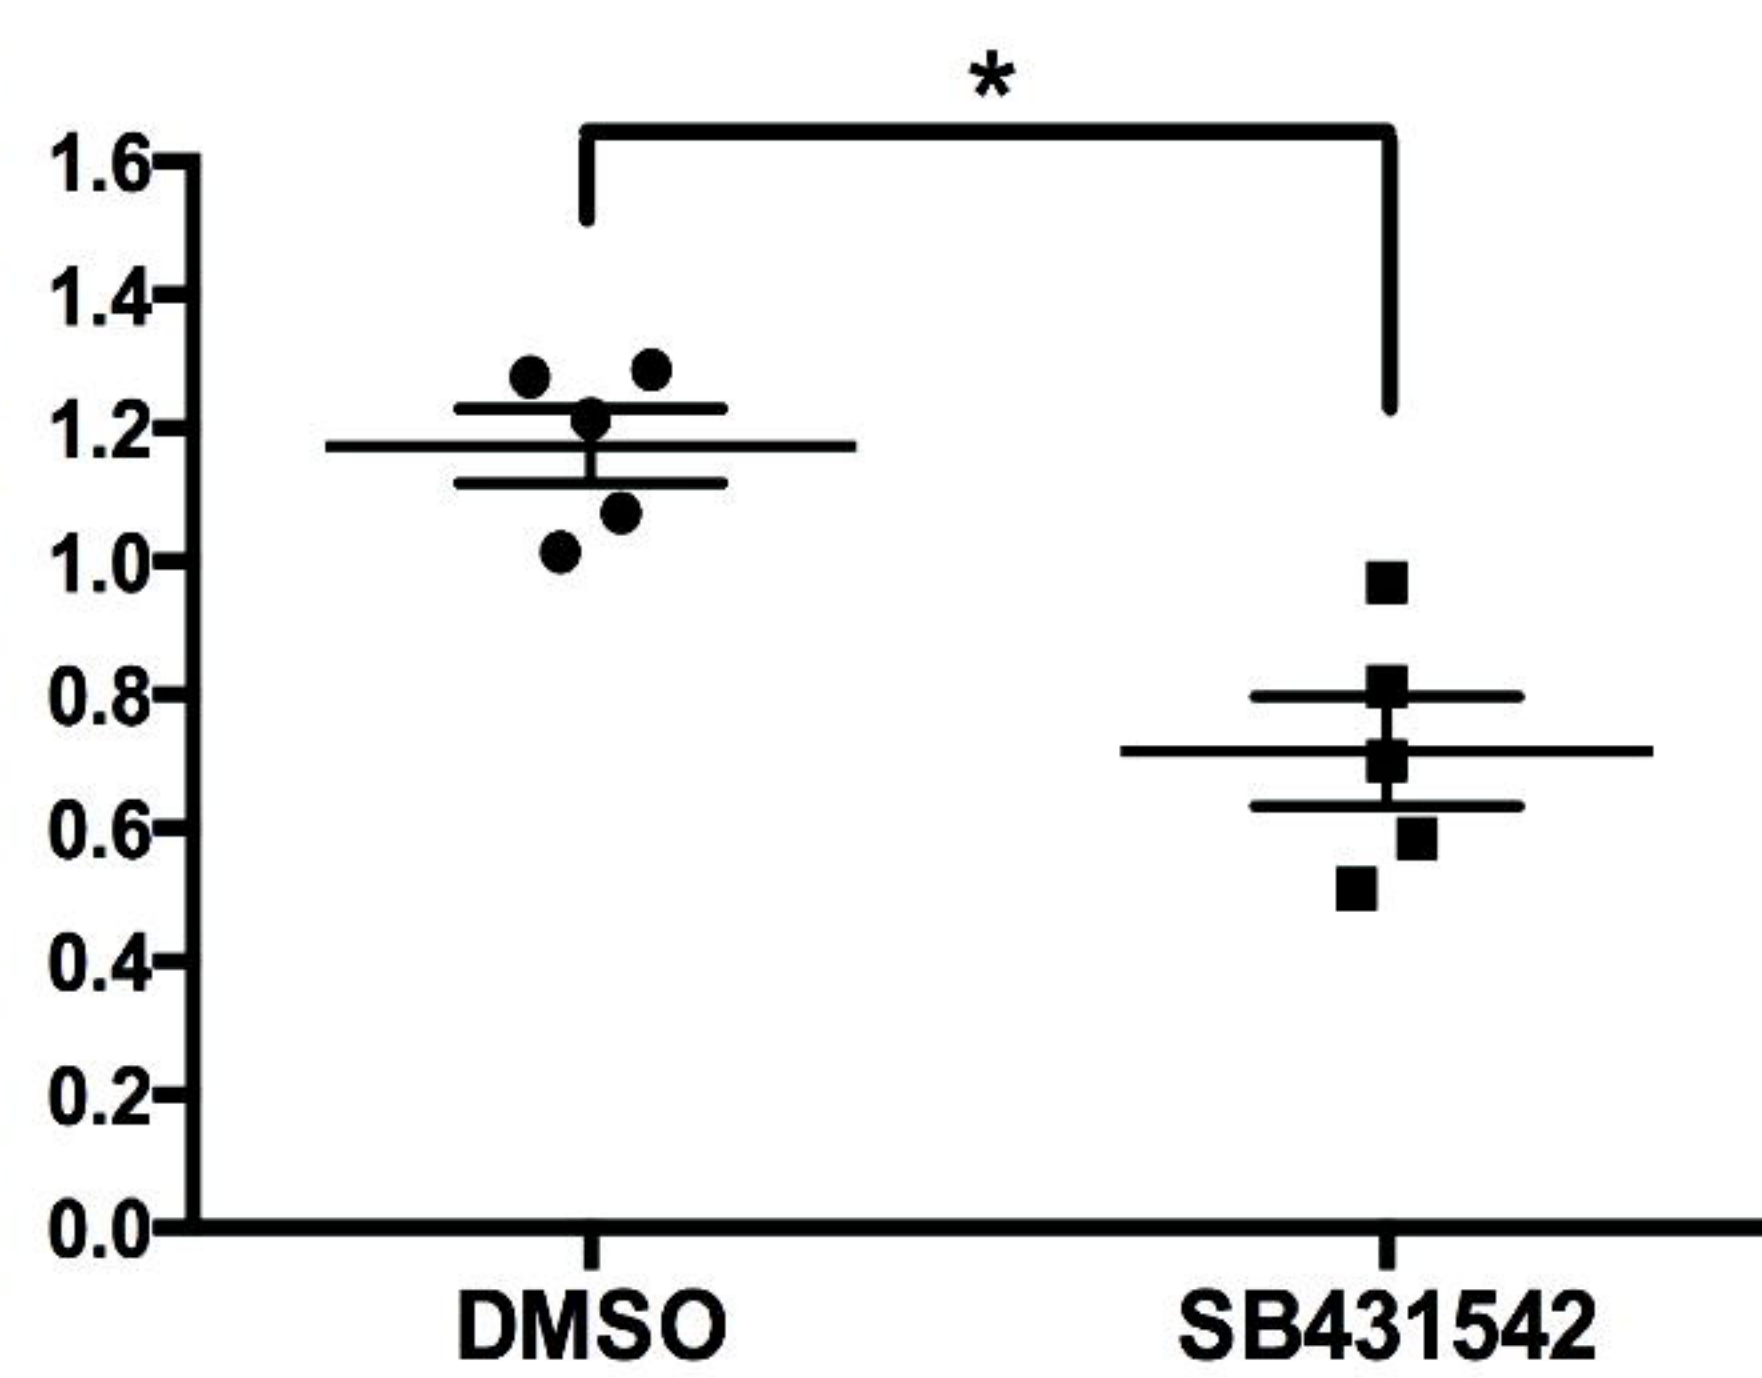

D

Avg. Disc Height (inches)

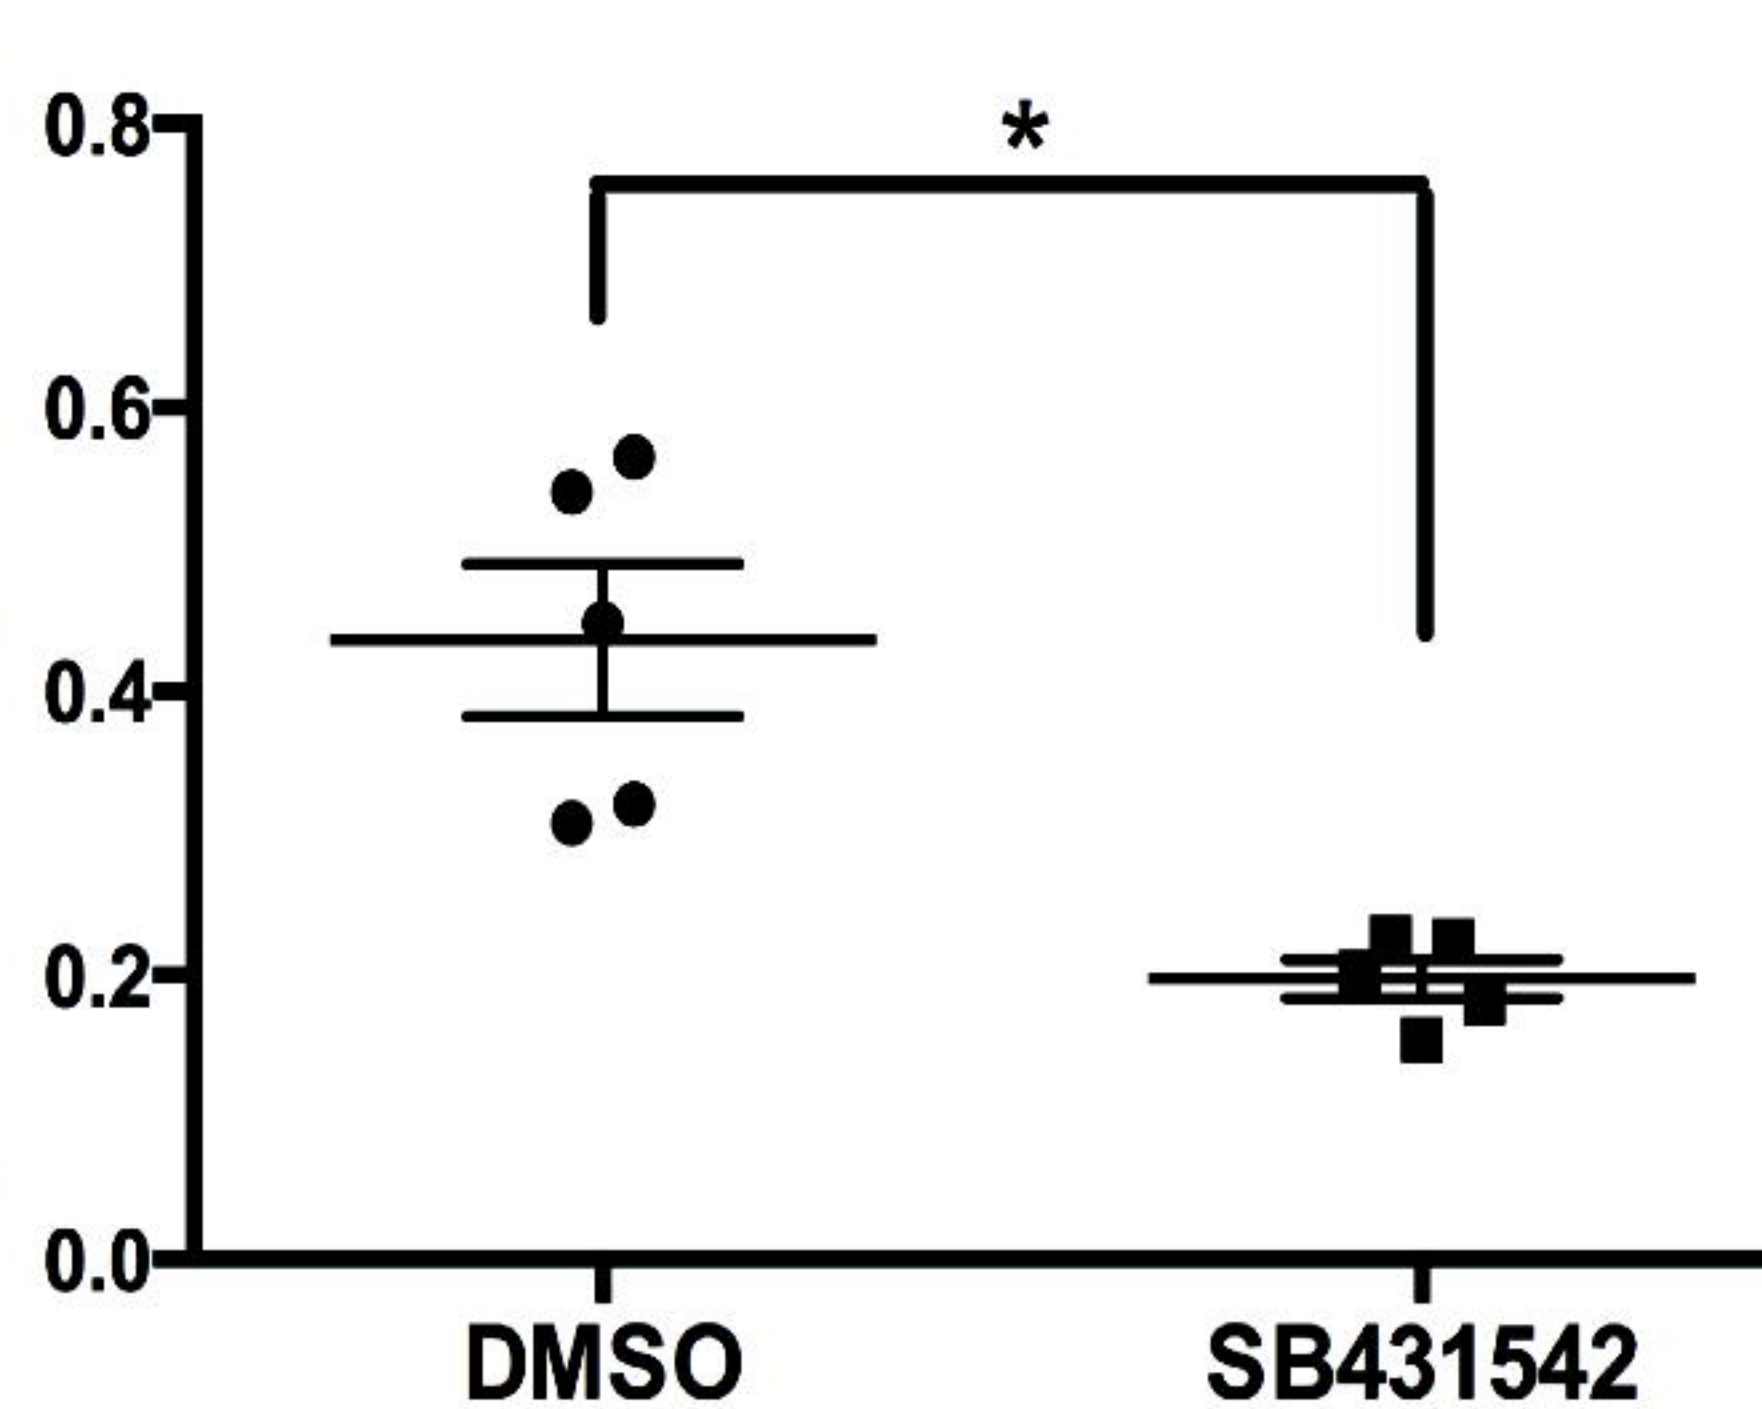

G

Area (inches<sup>2</sup>)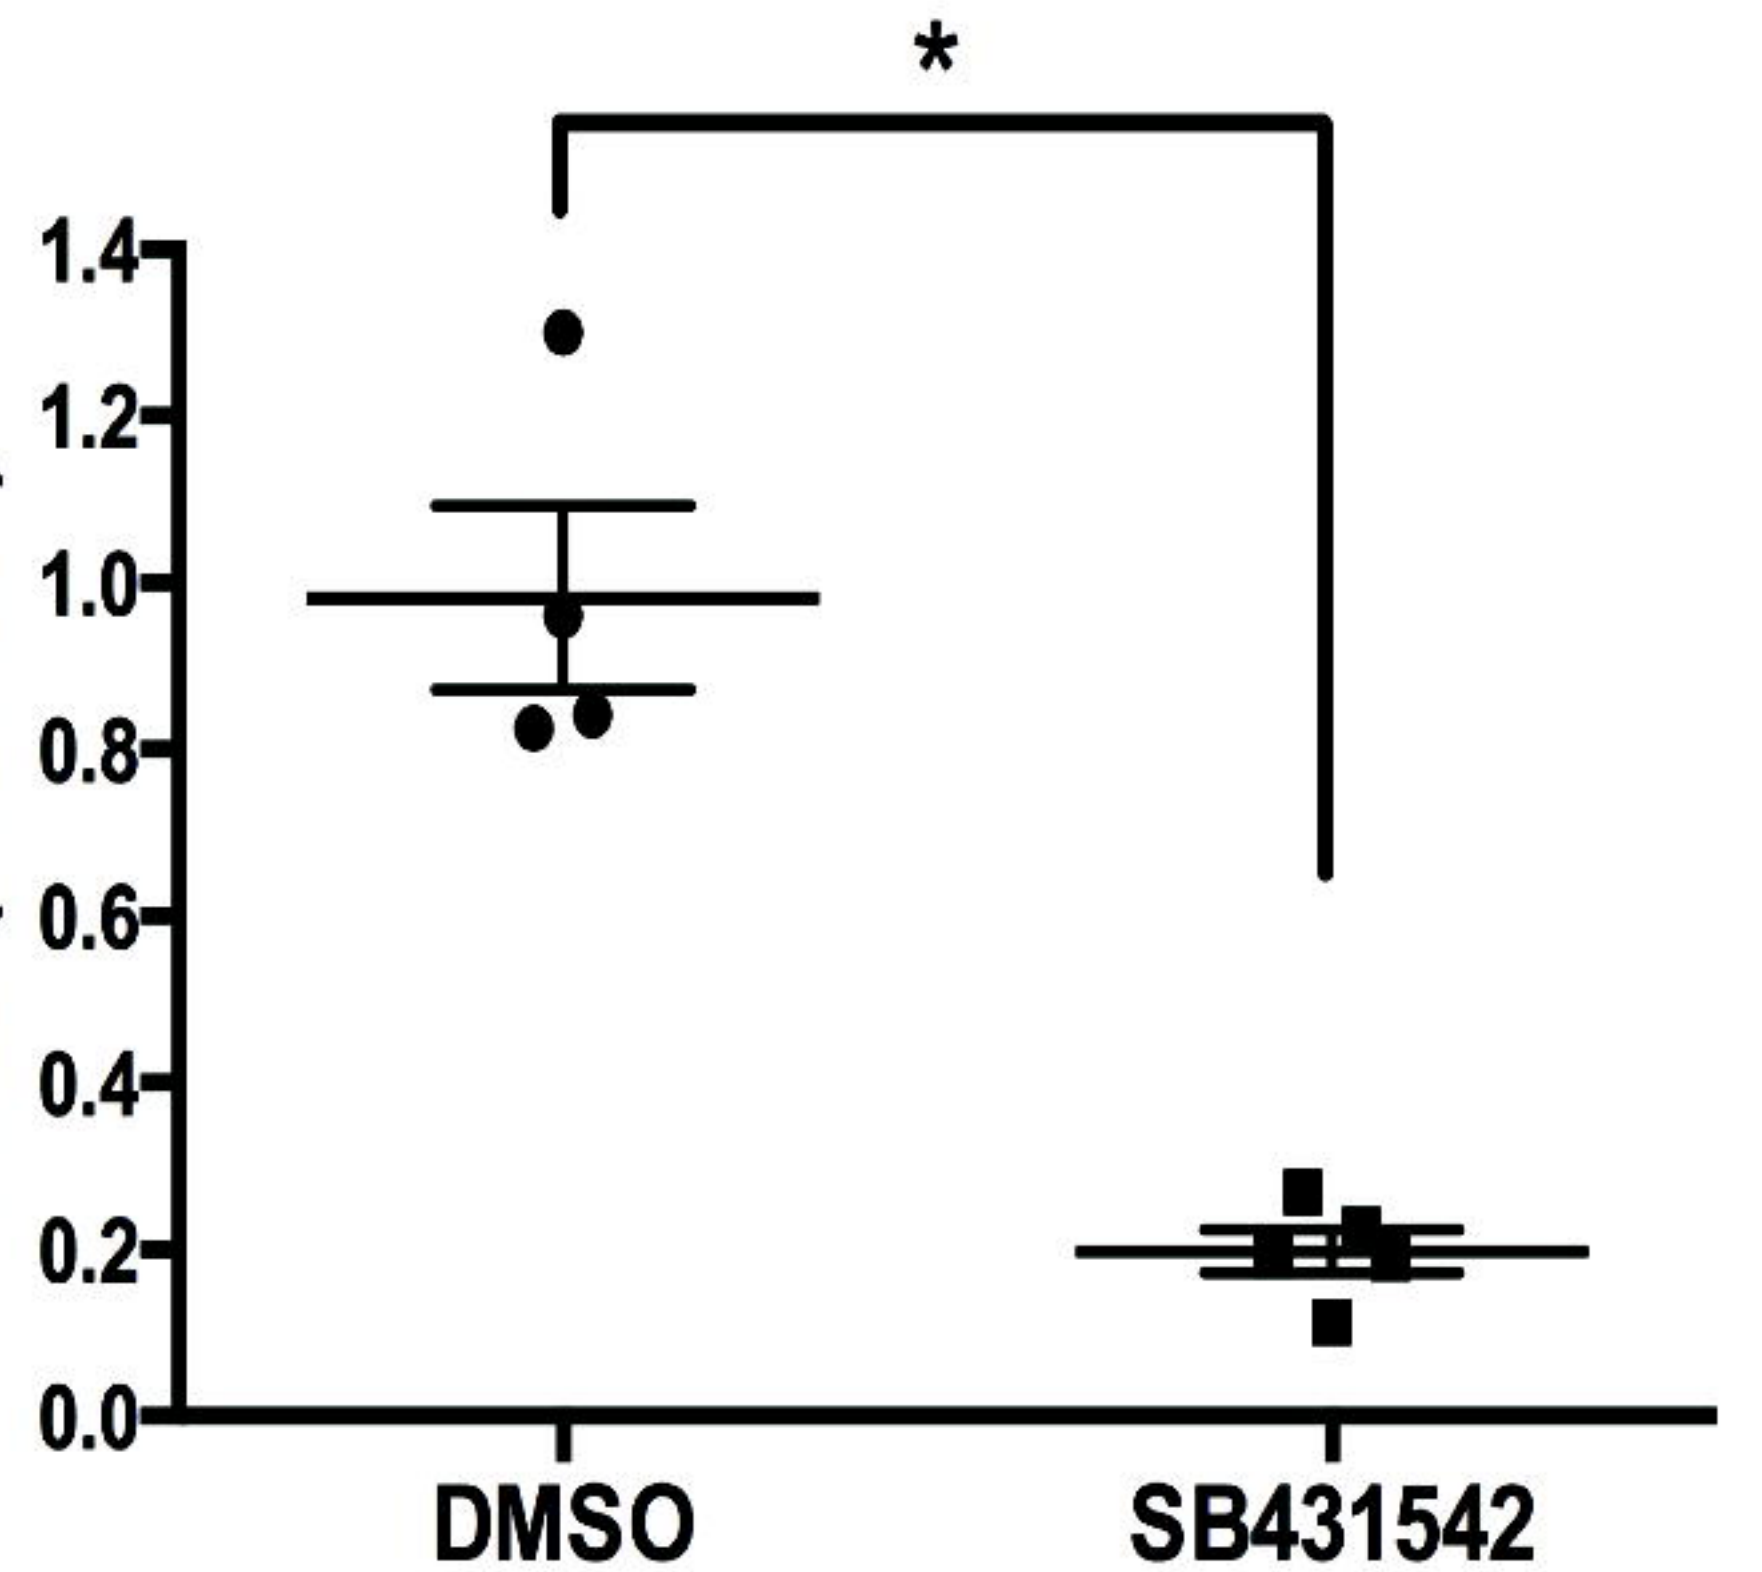



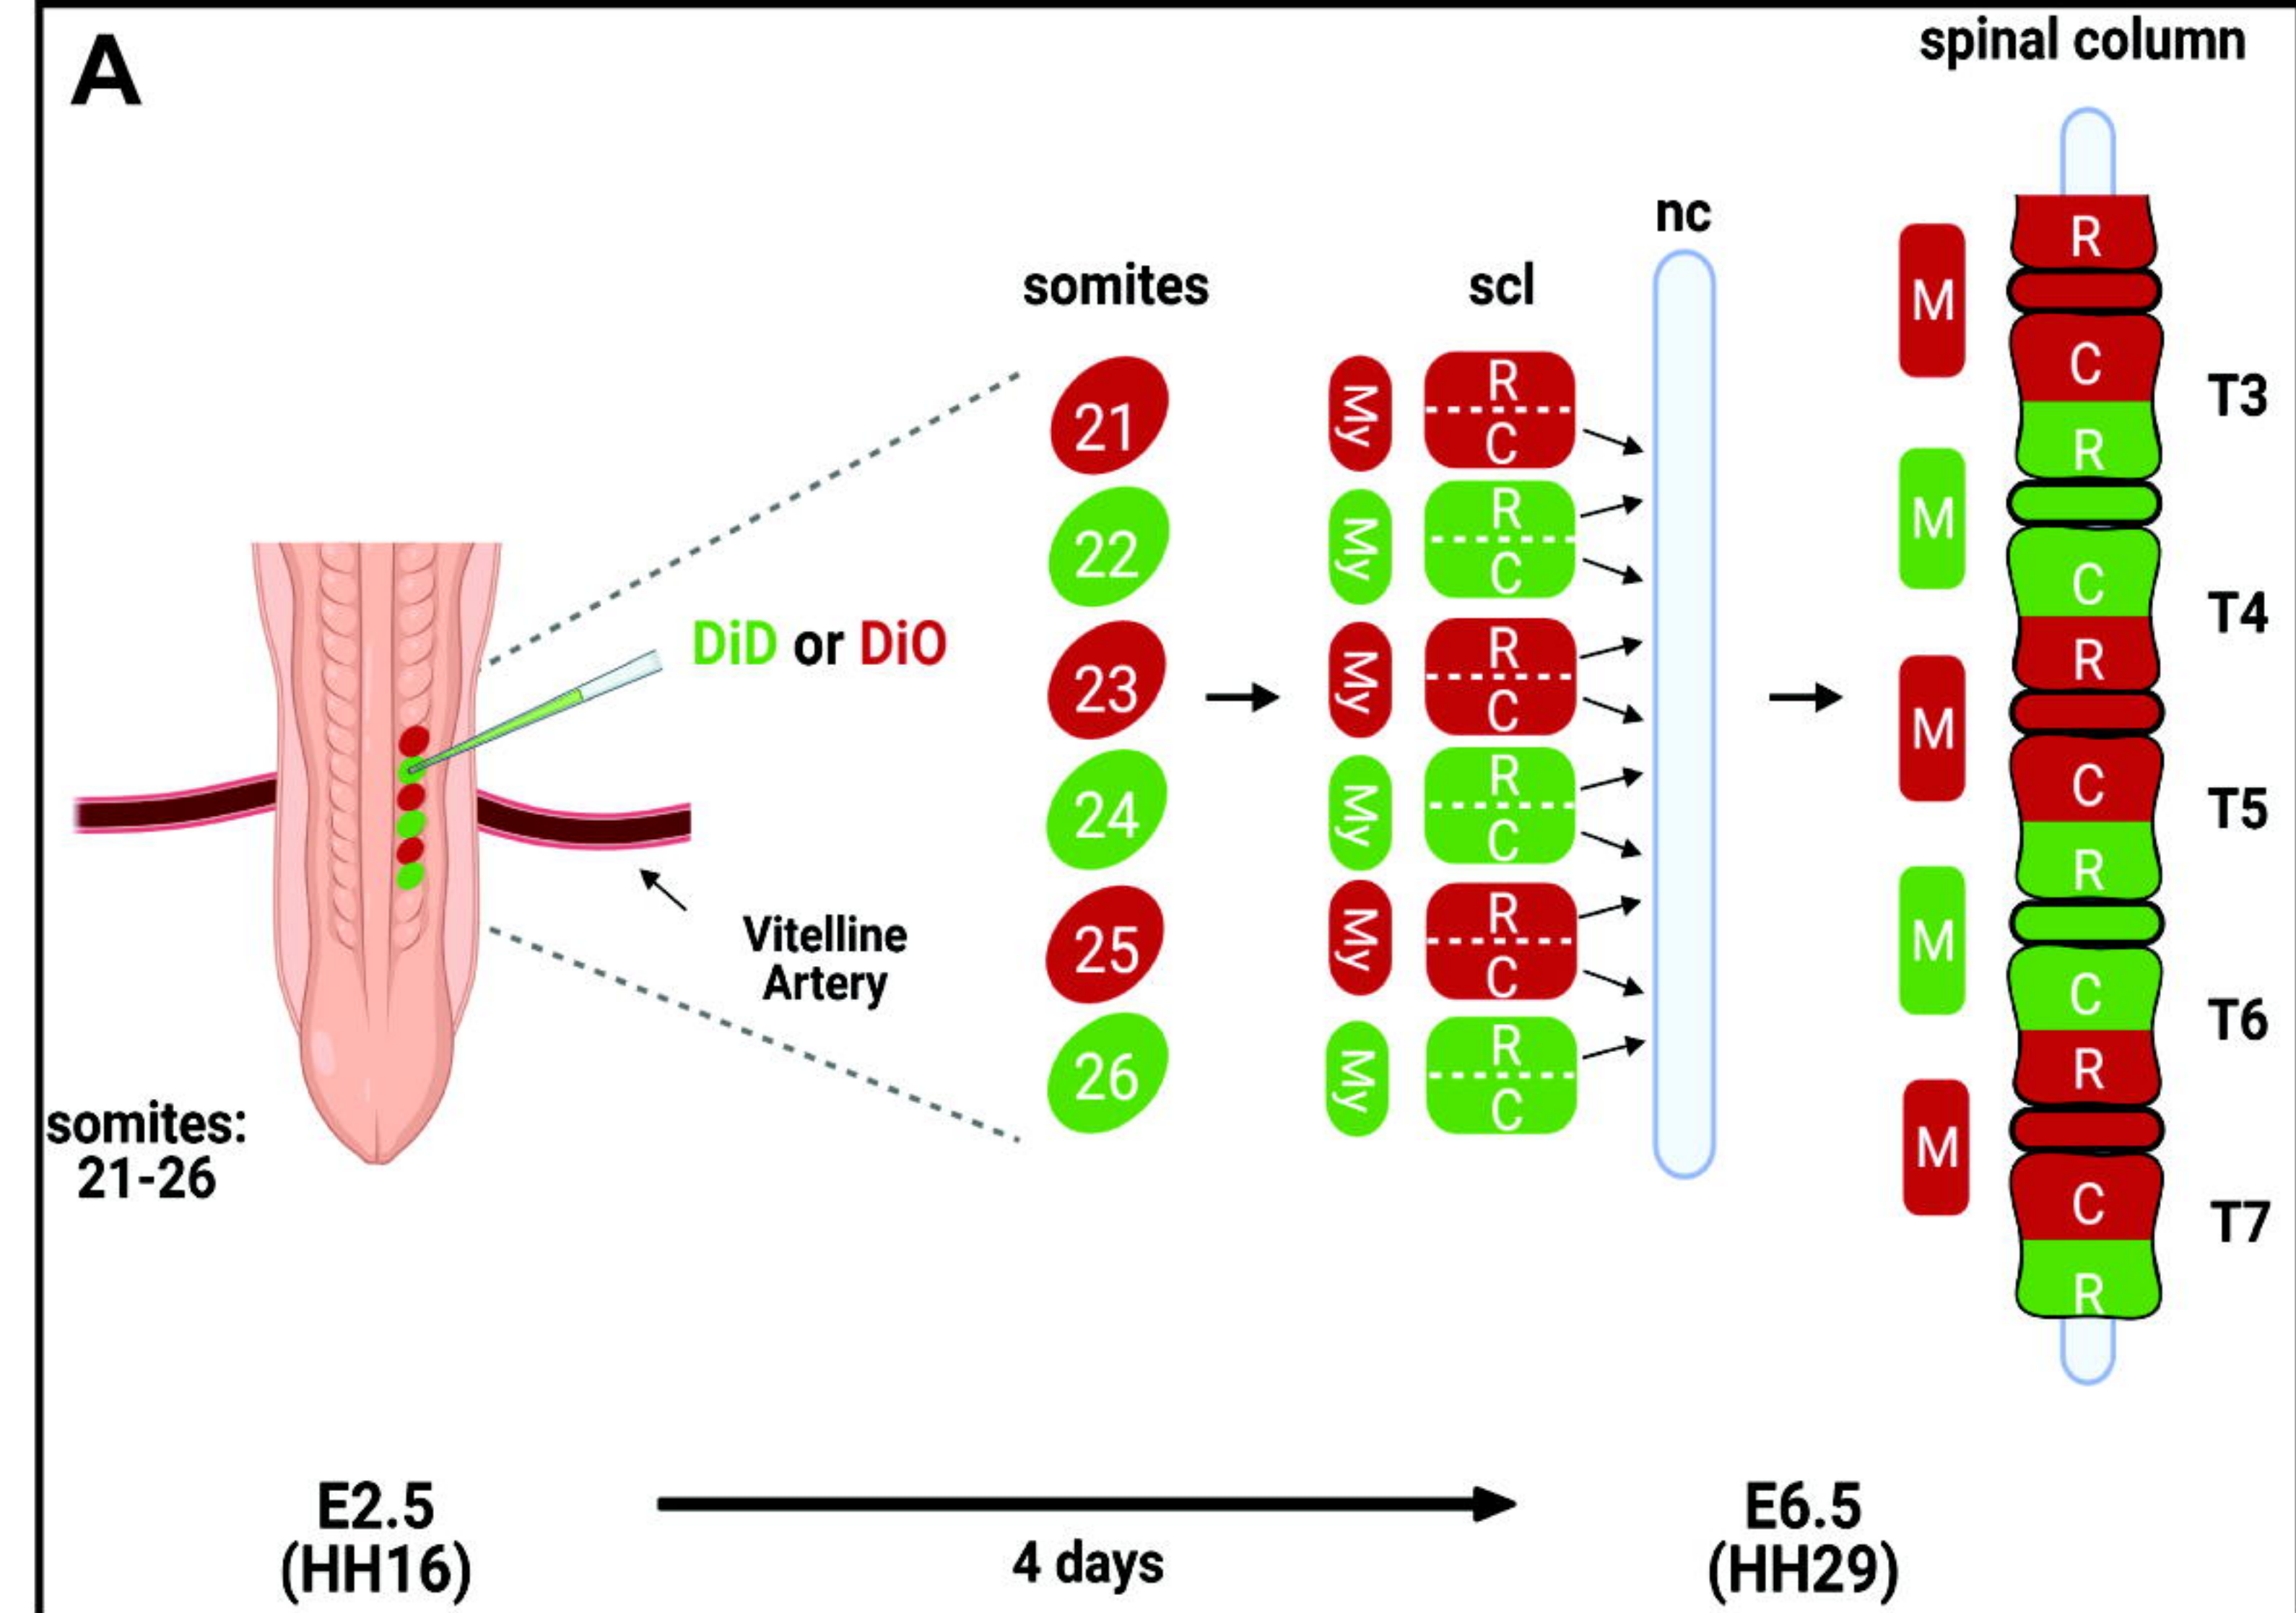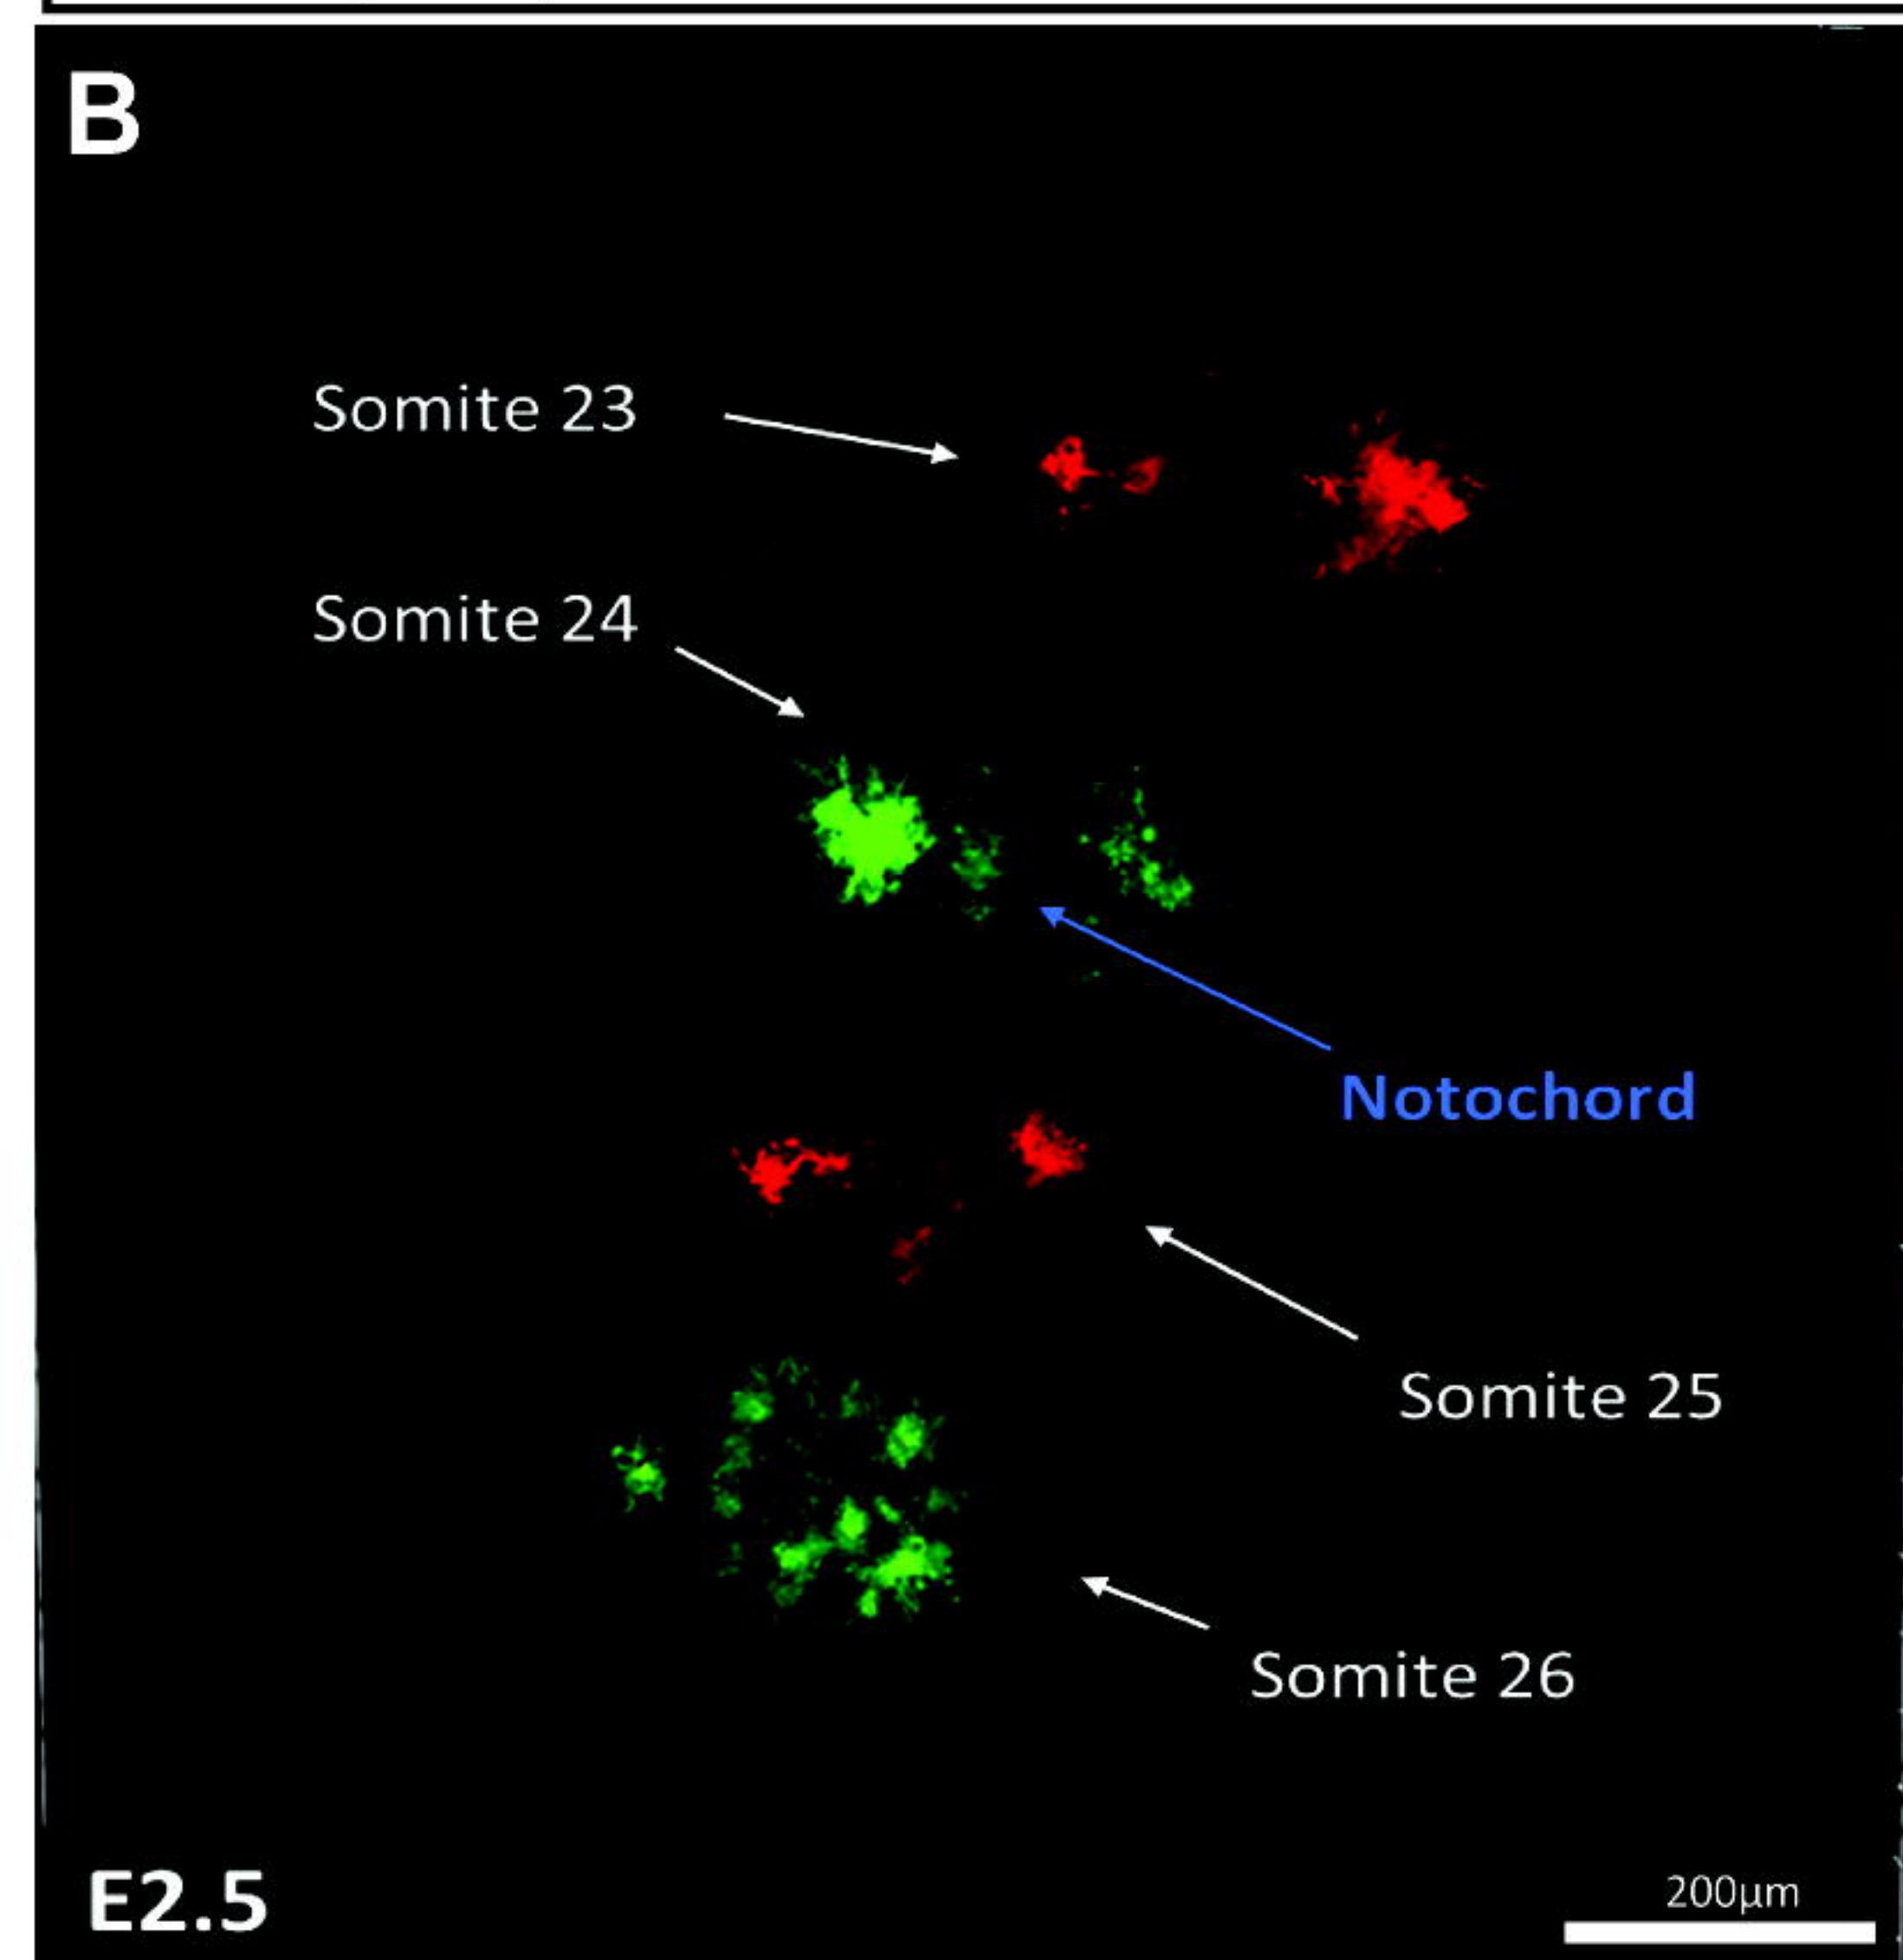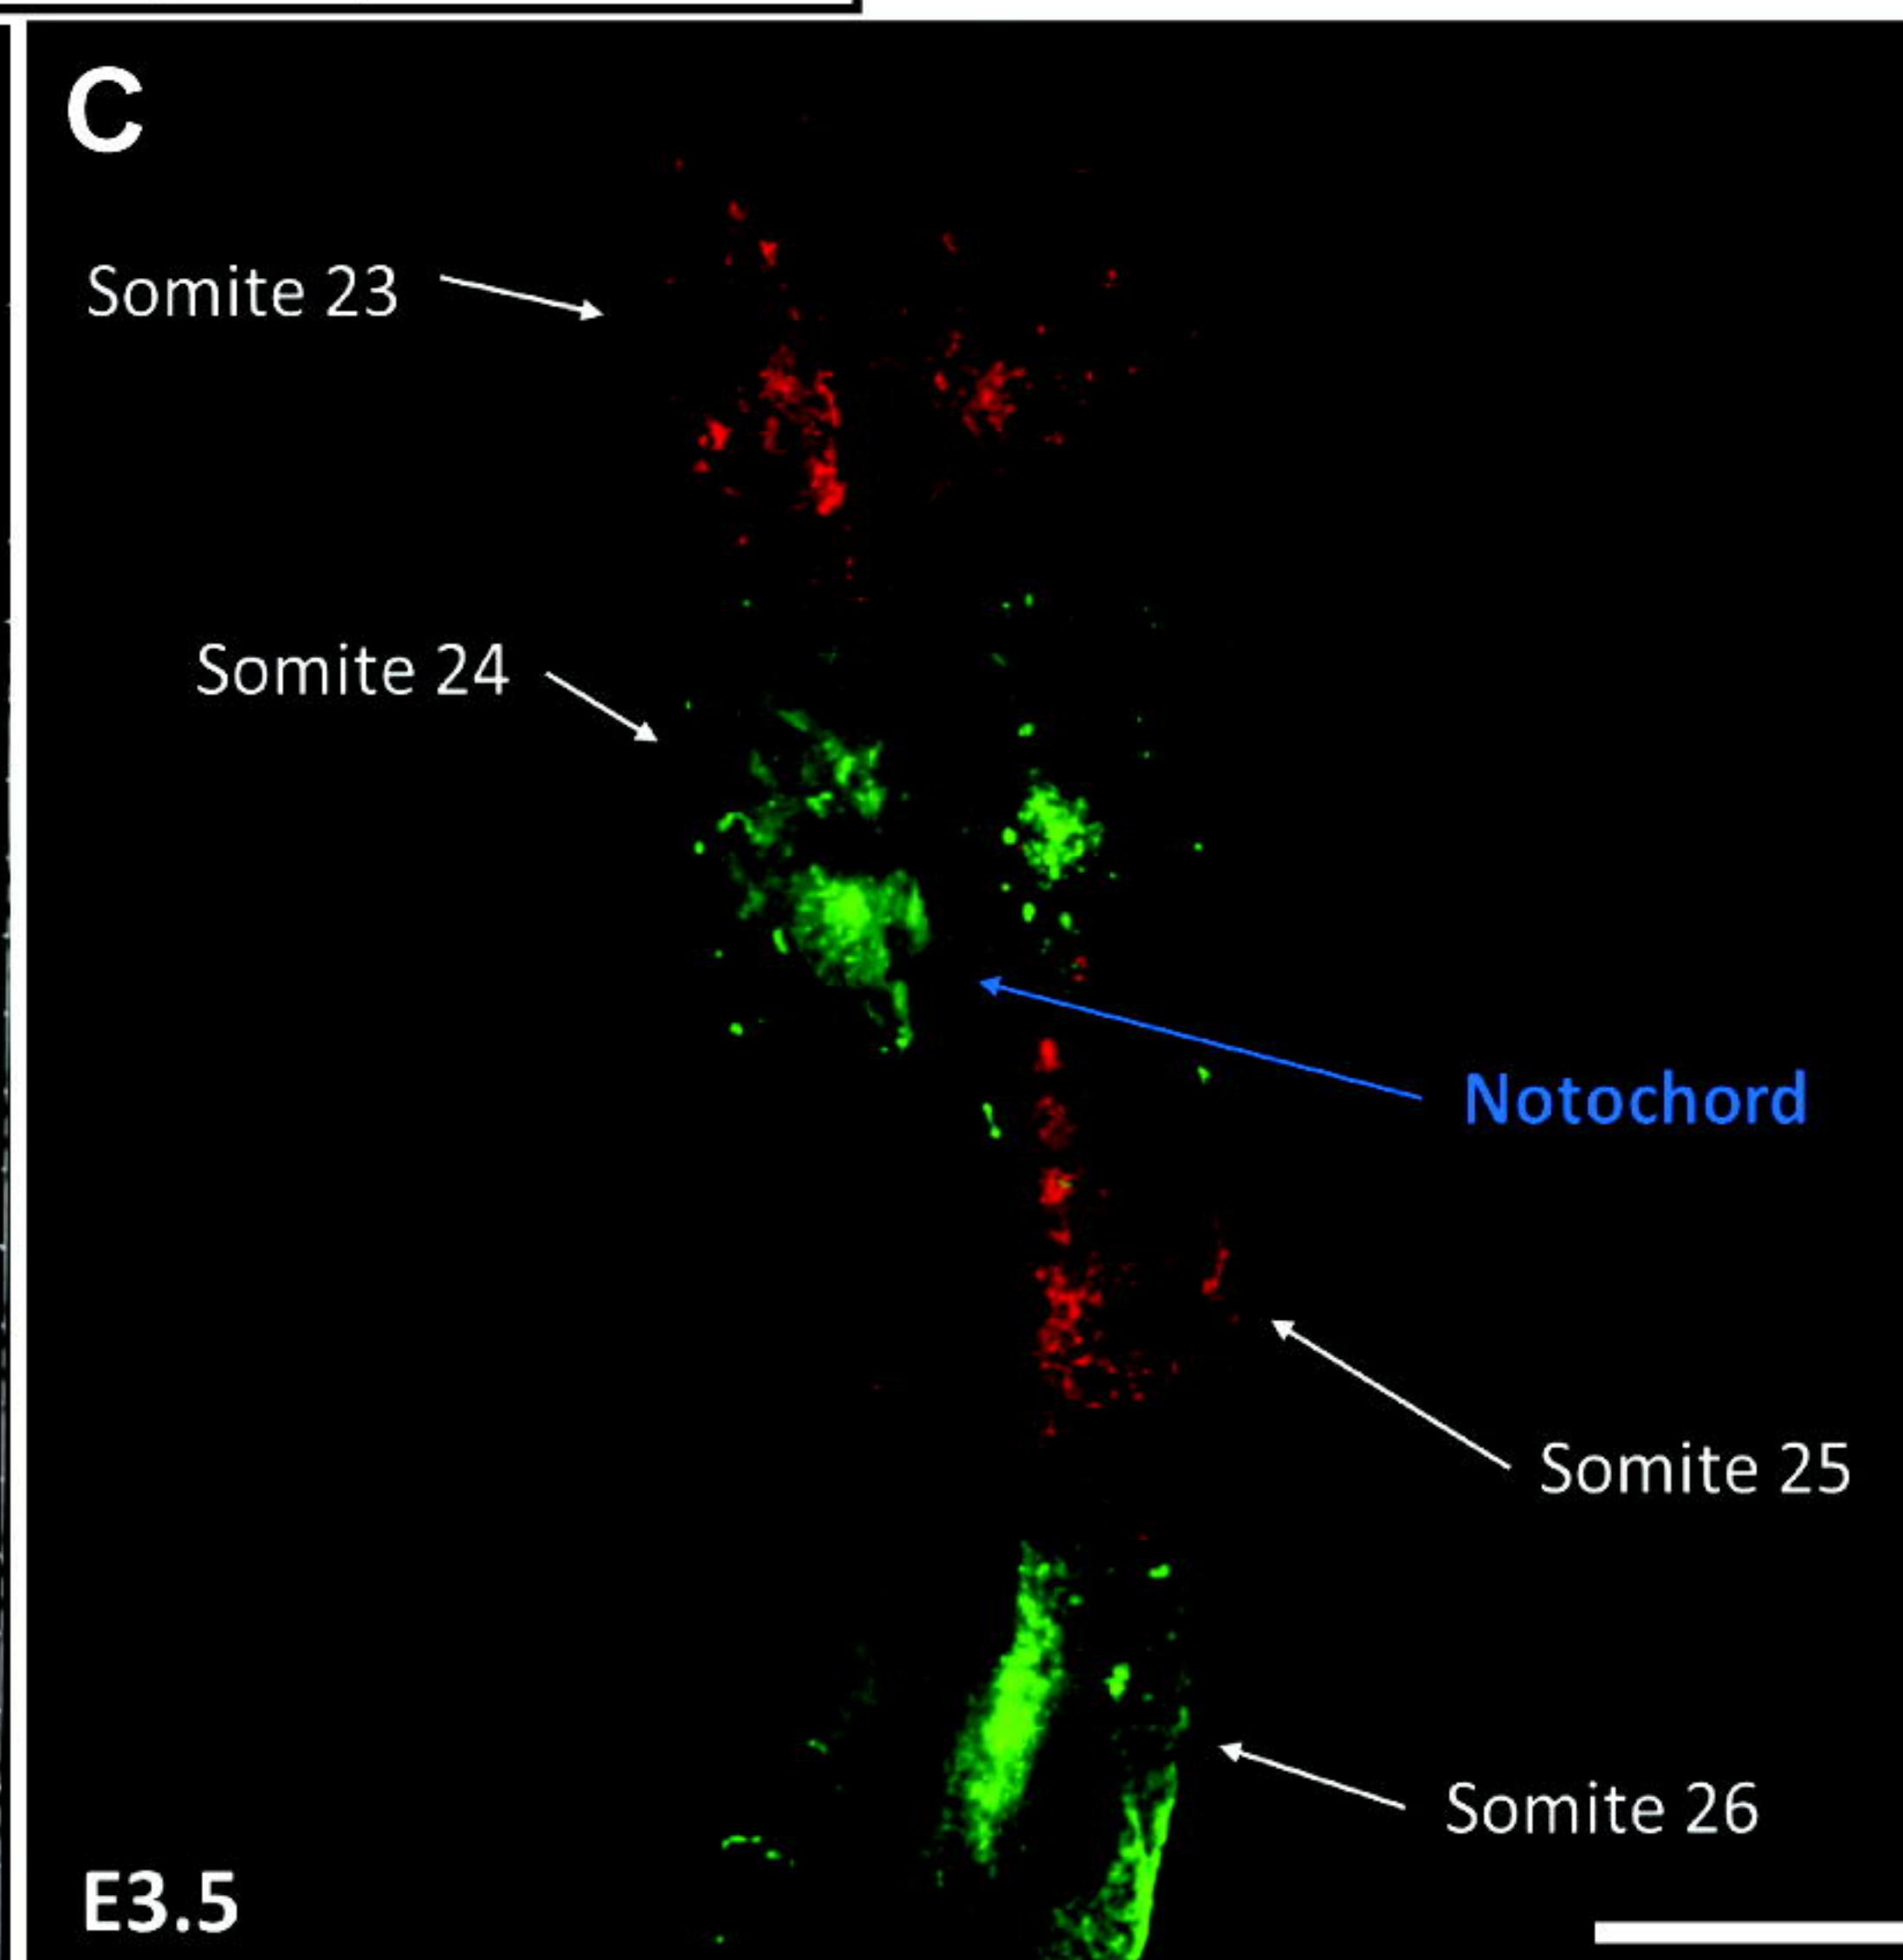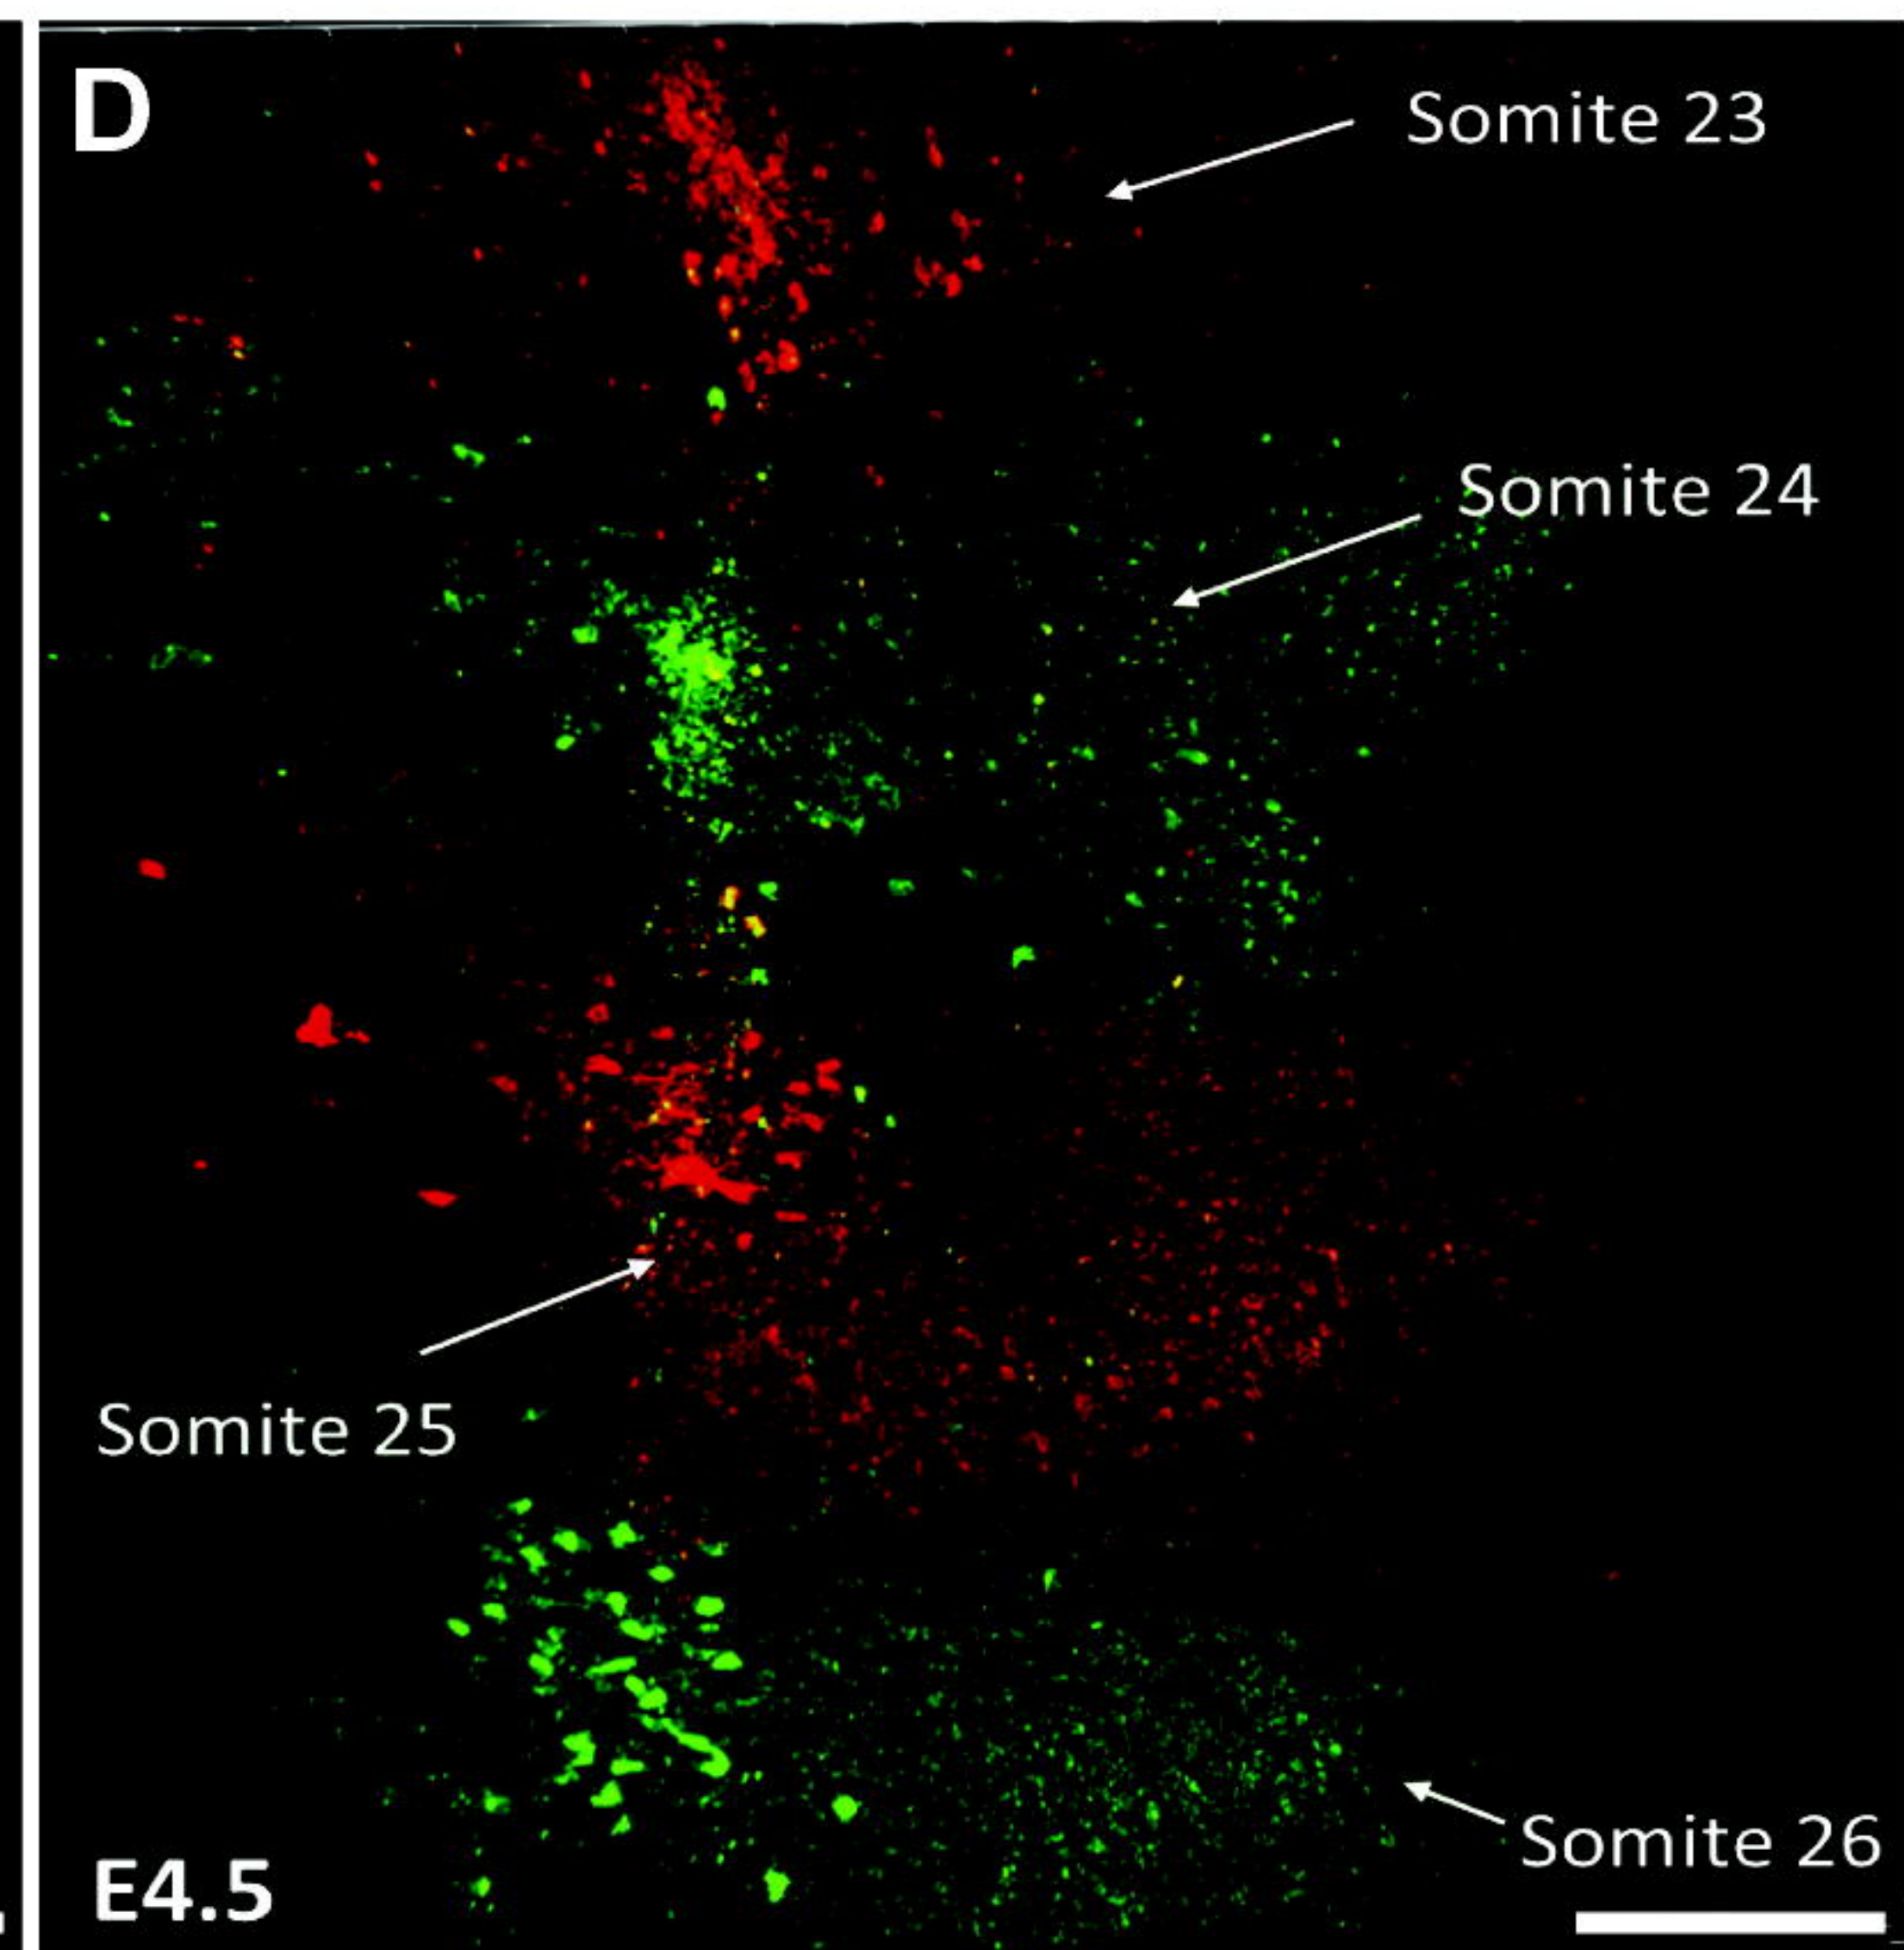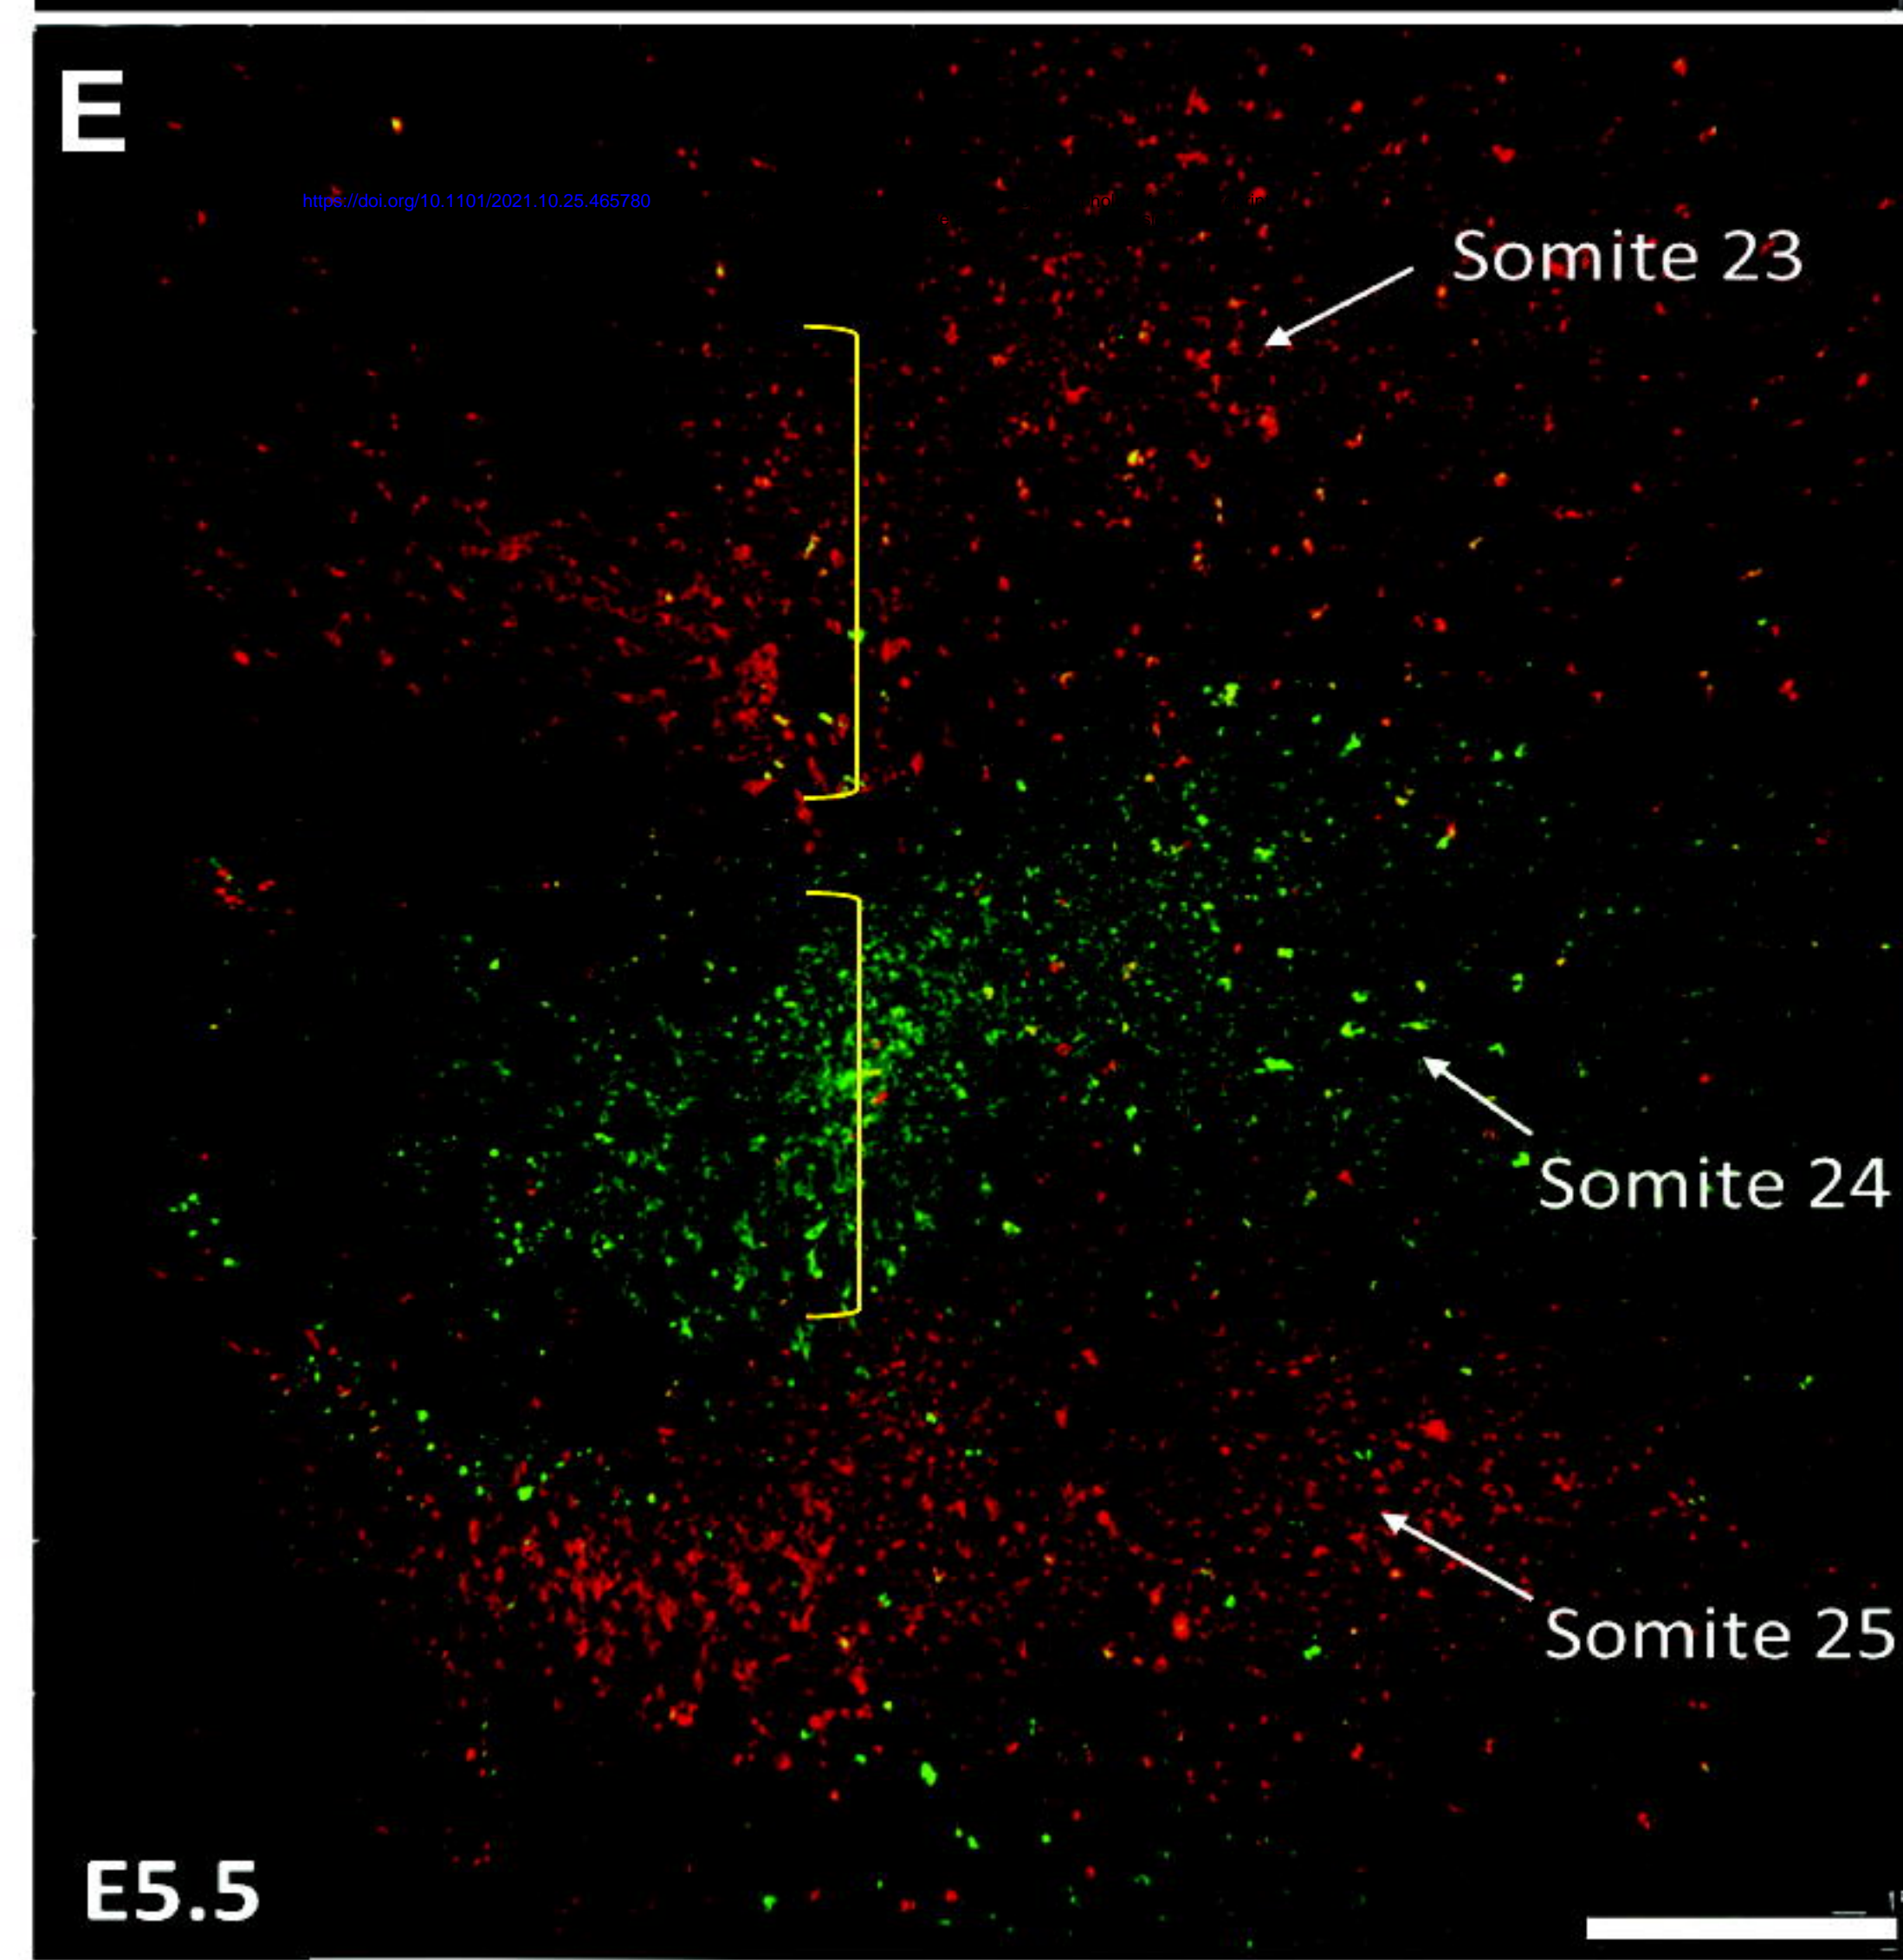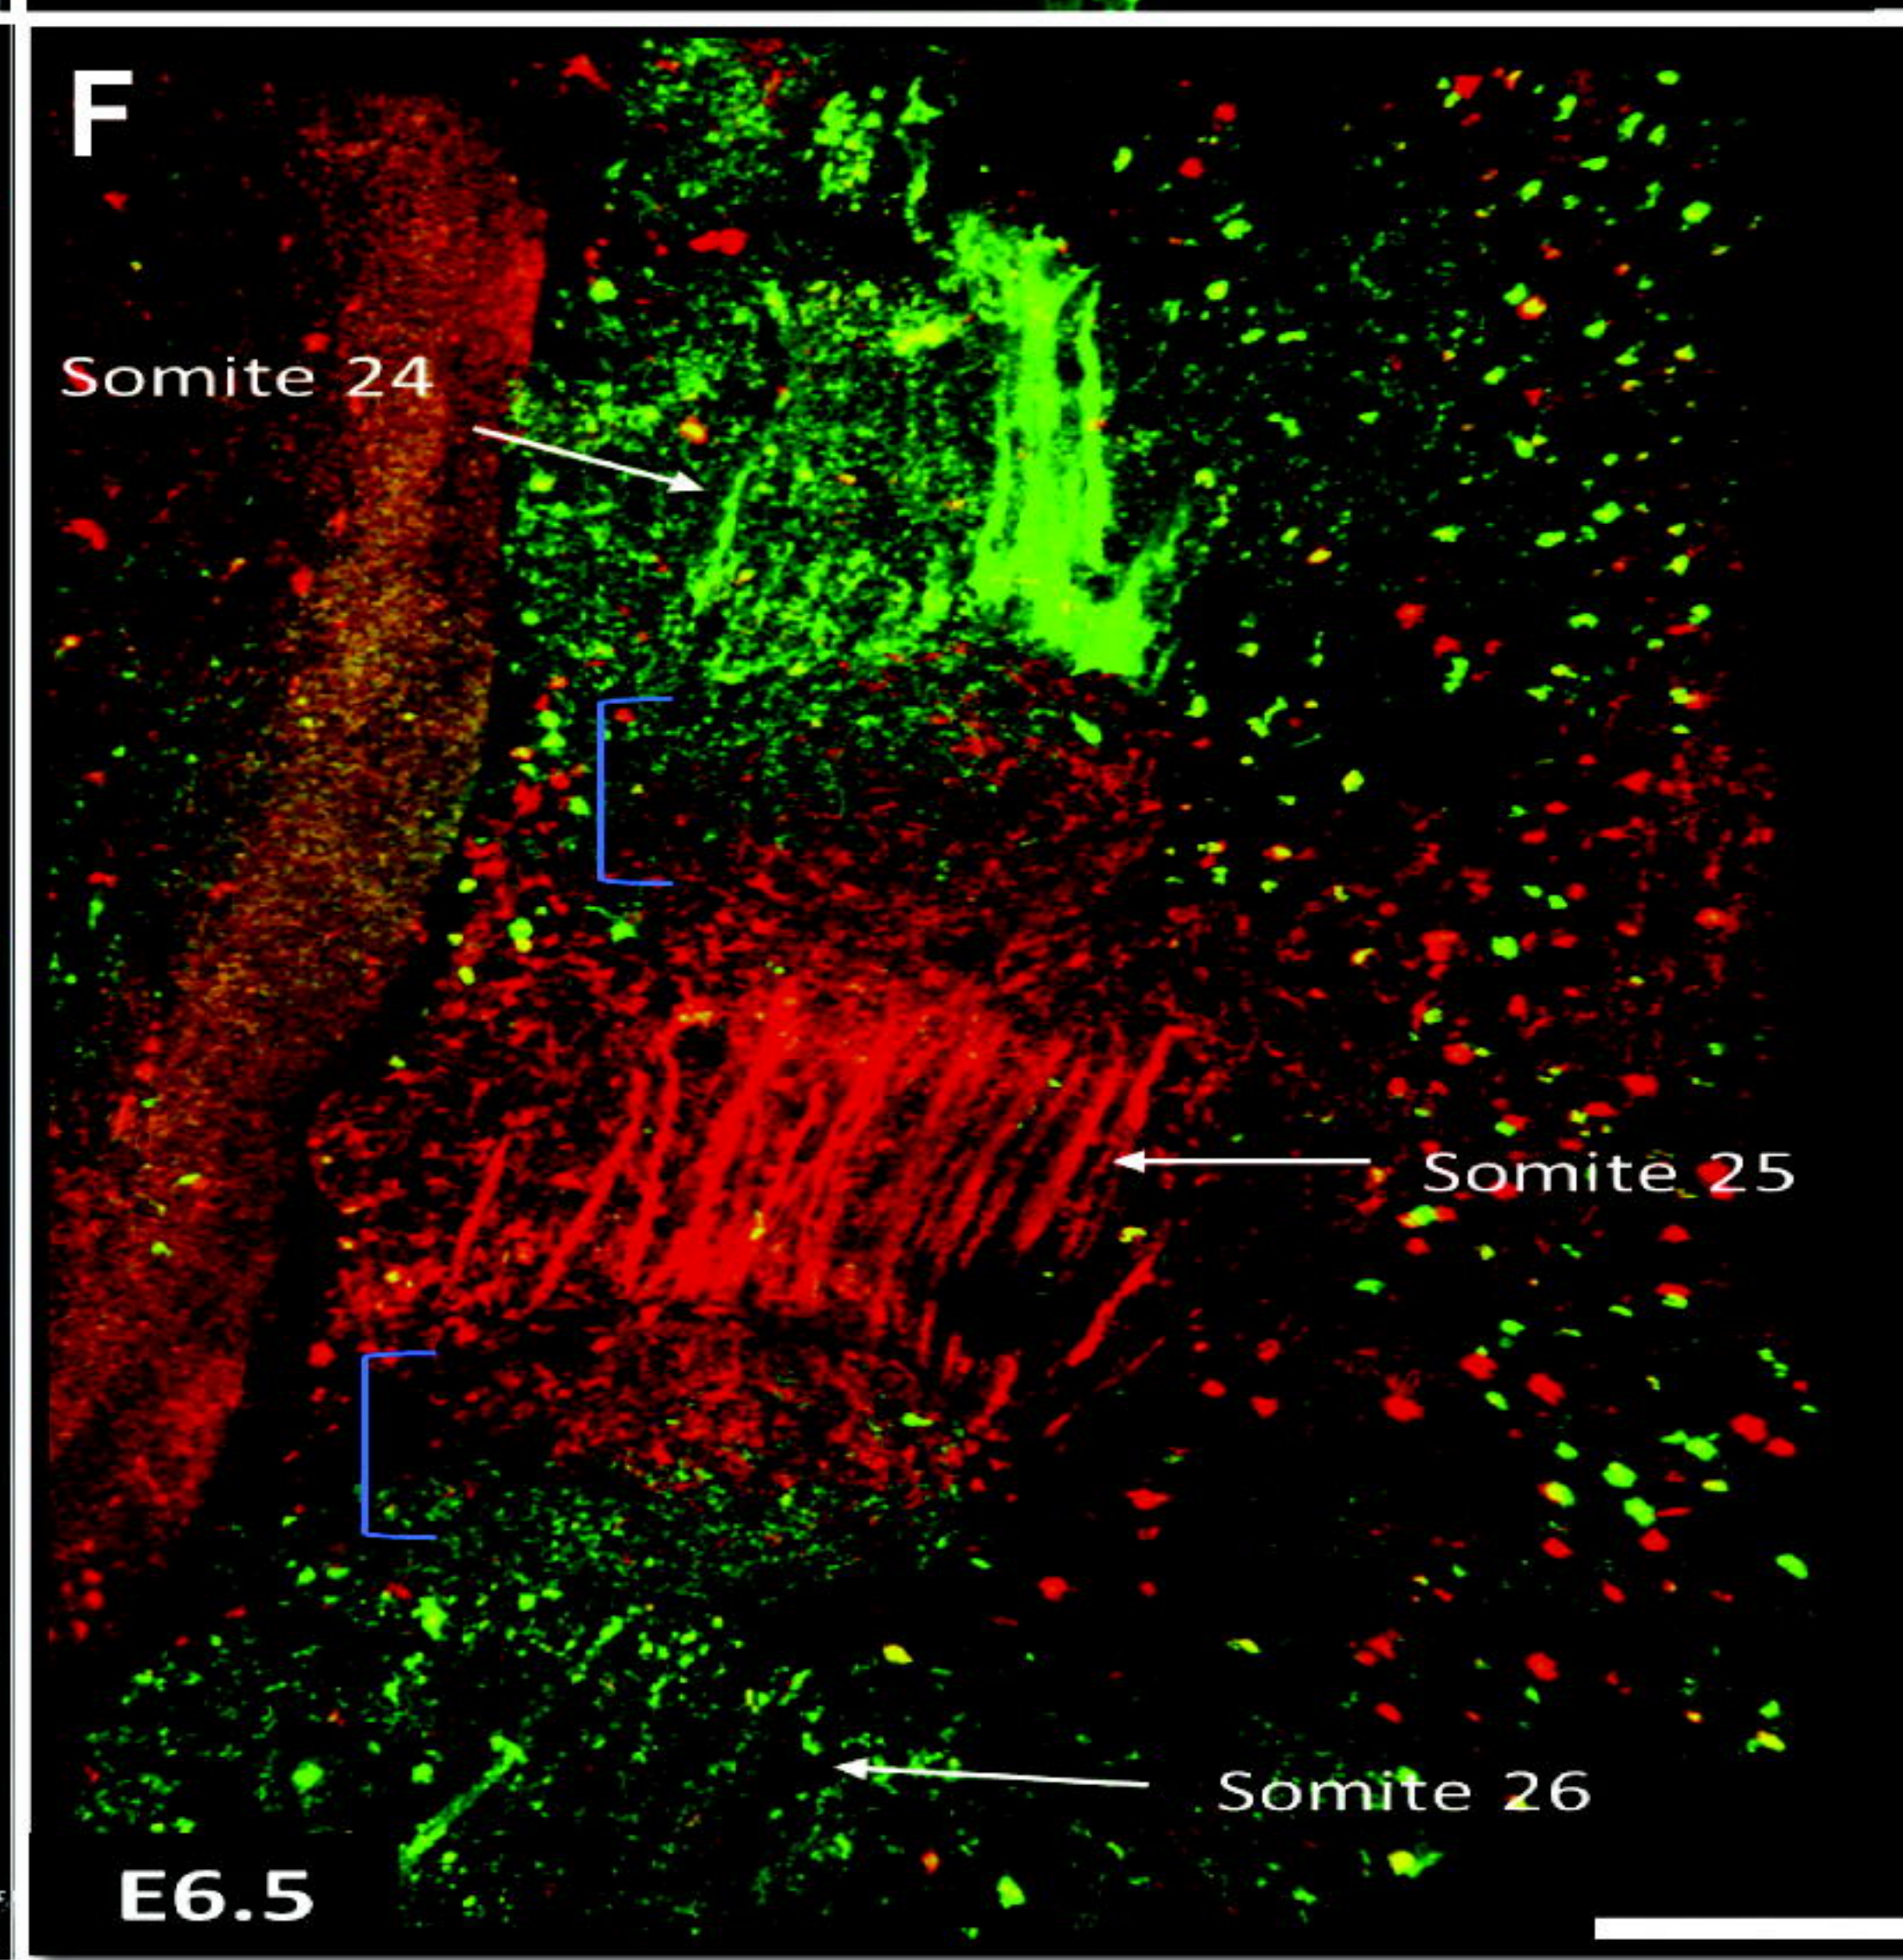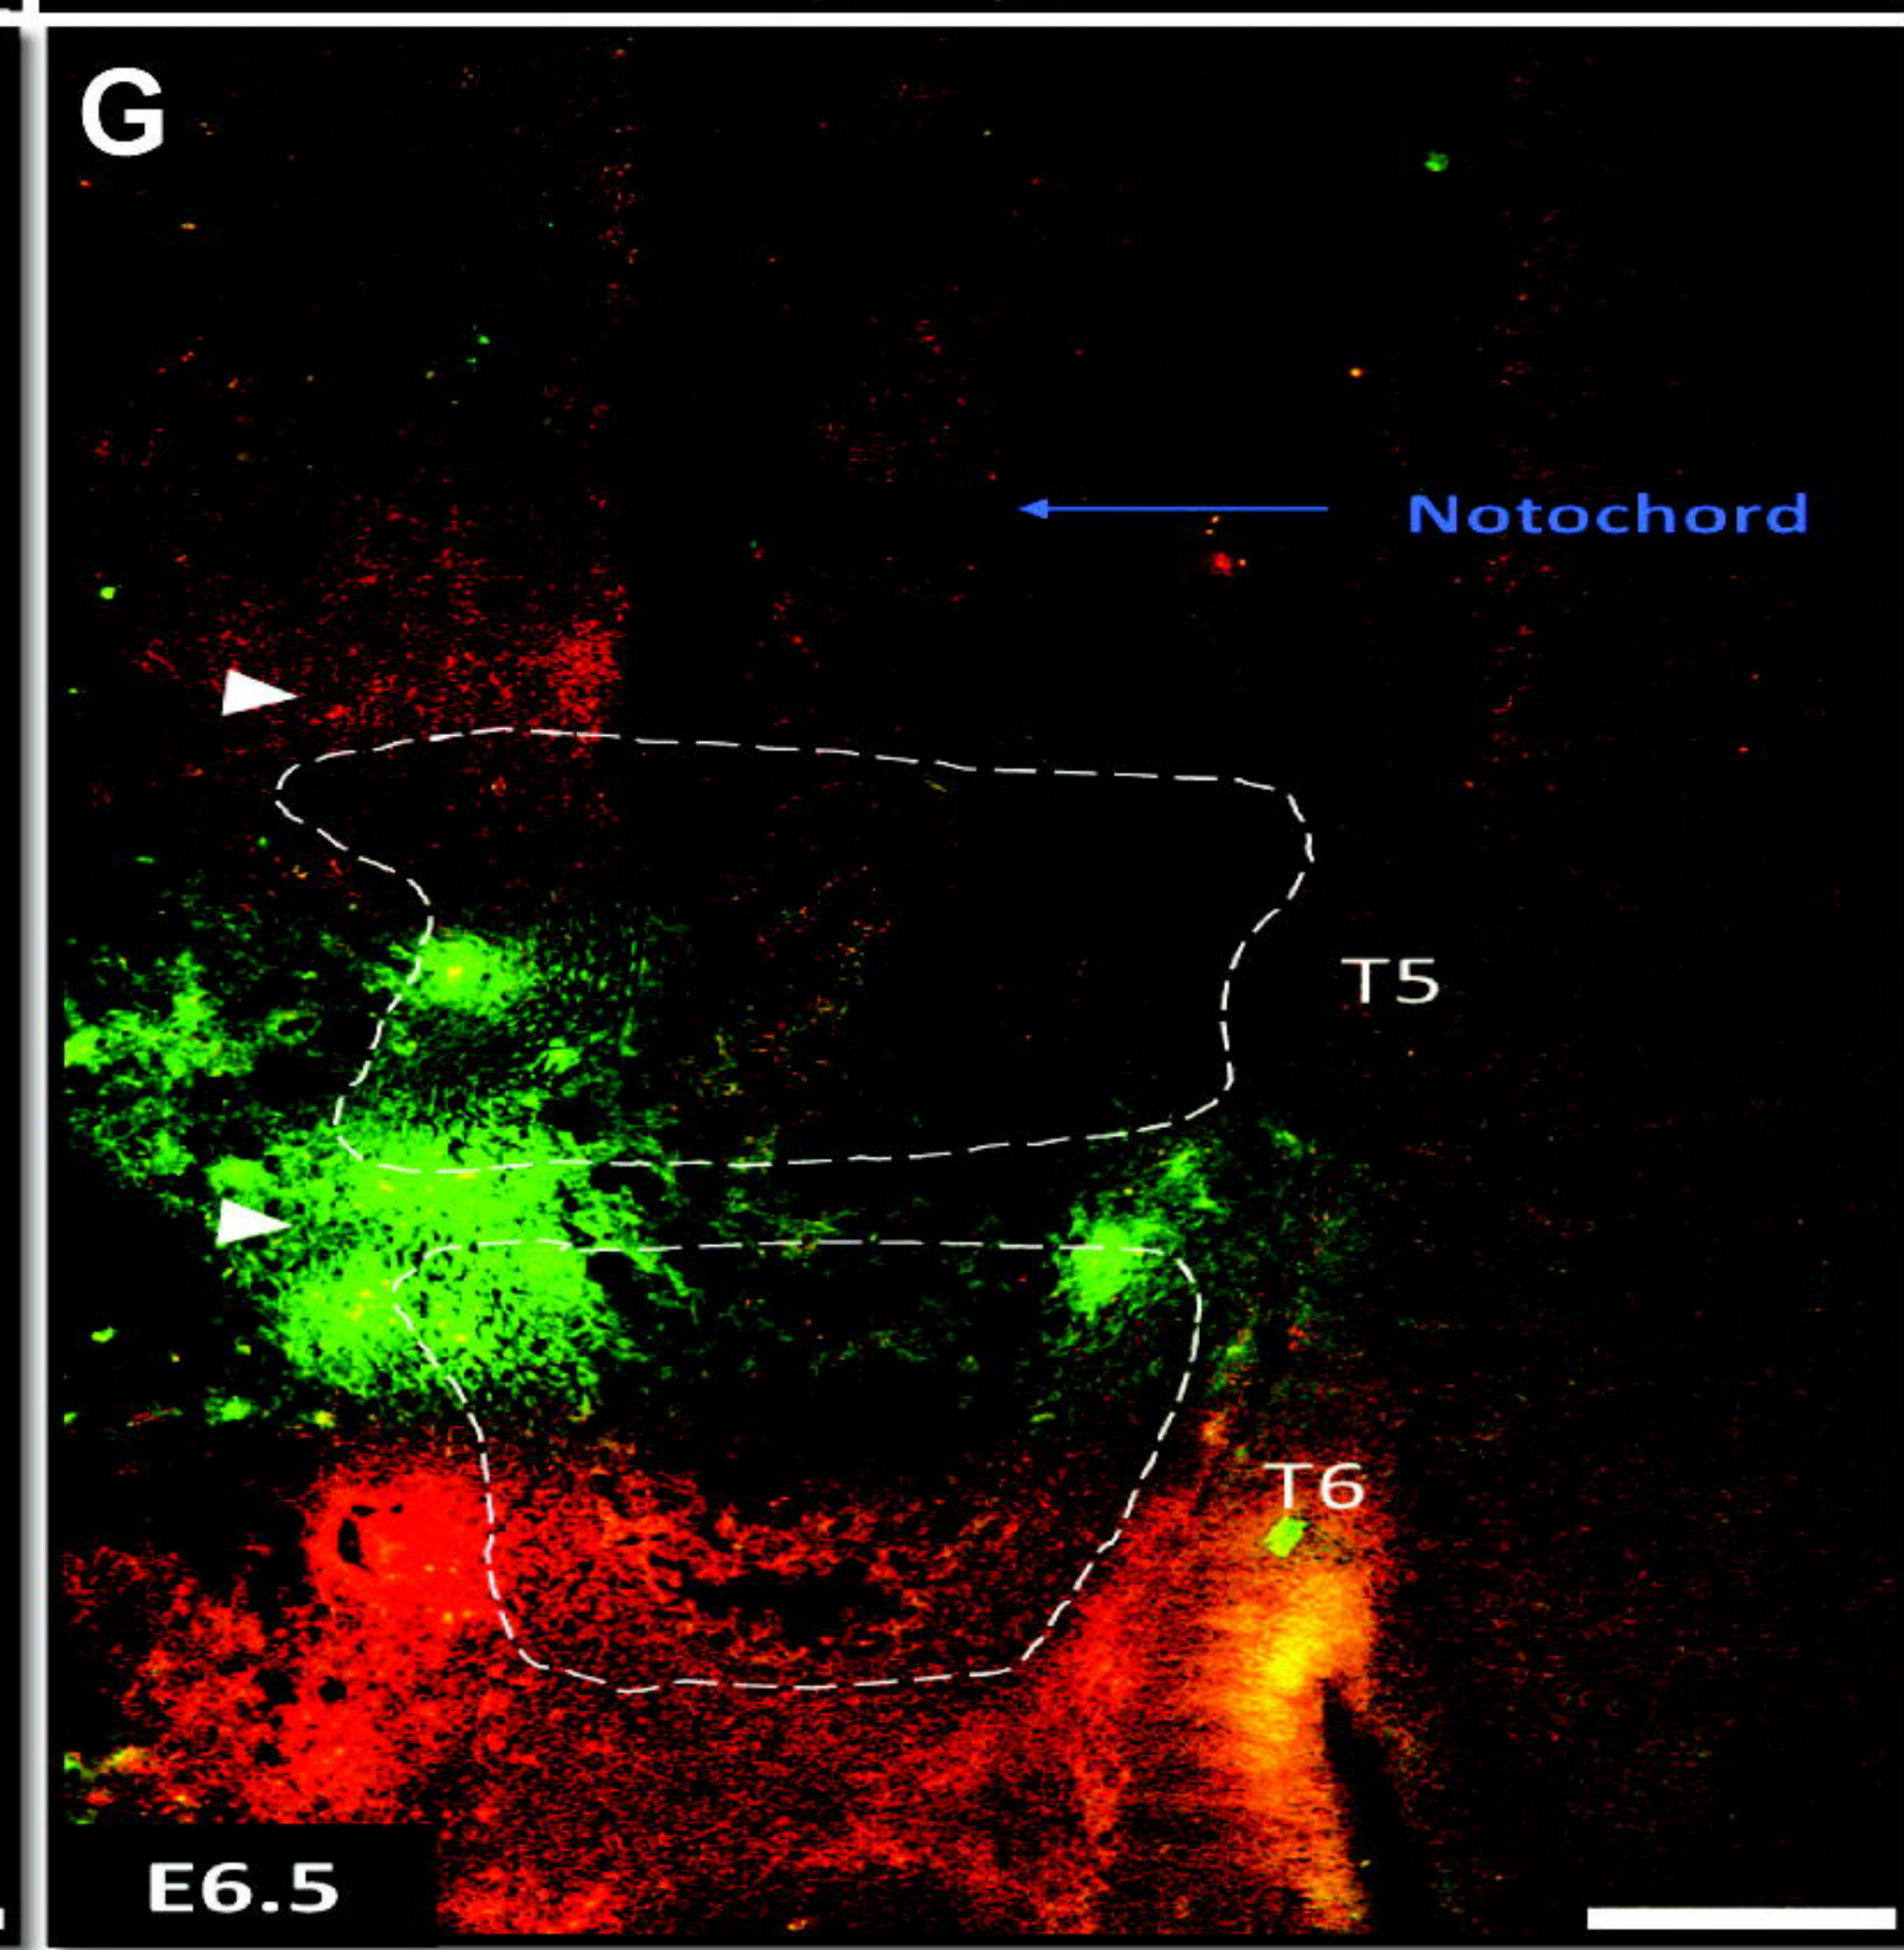



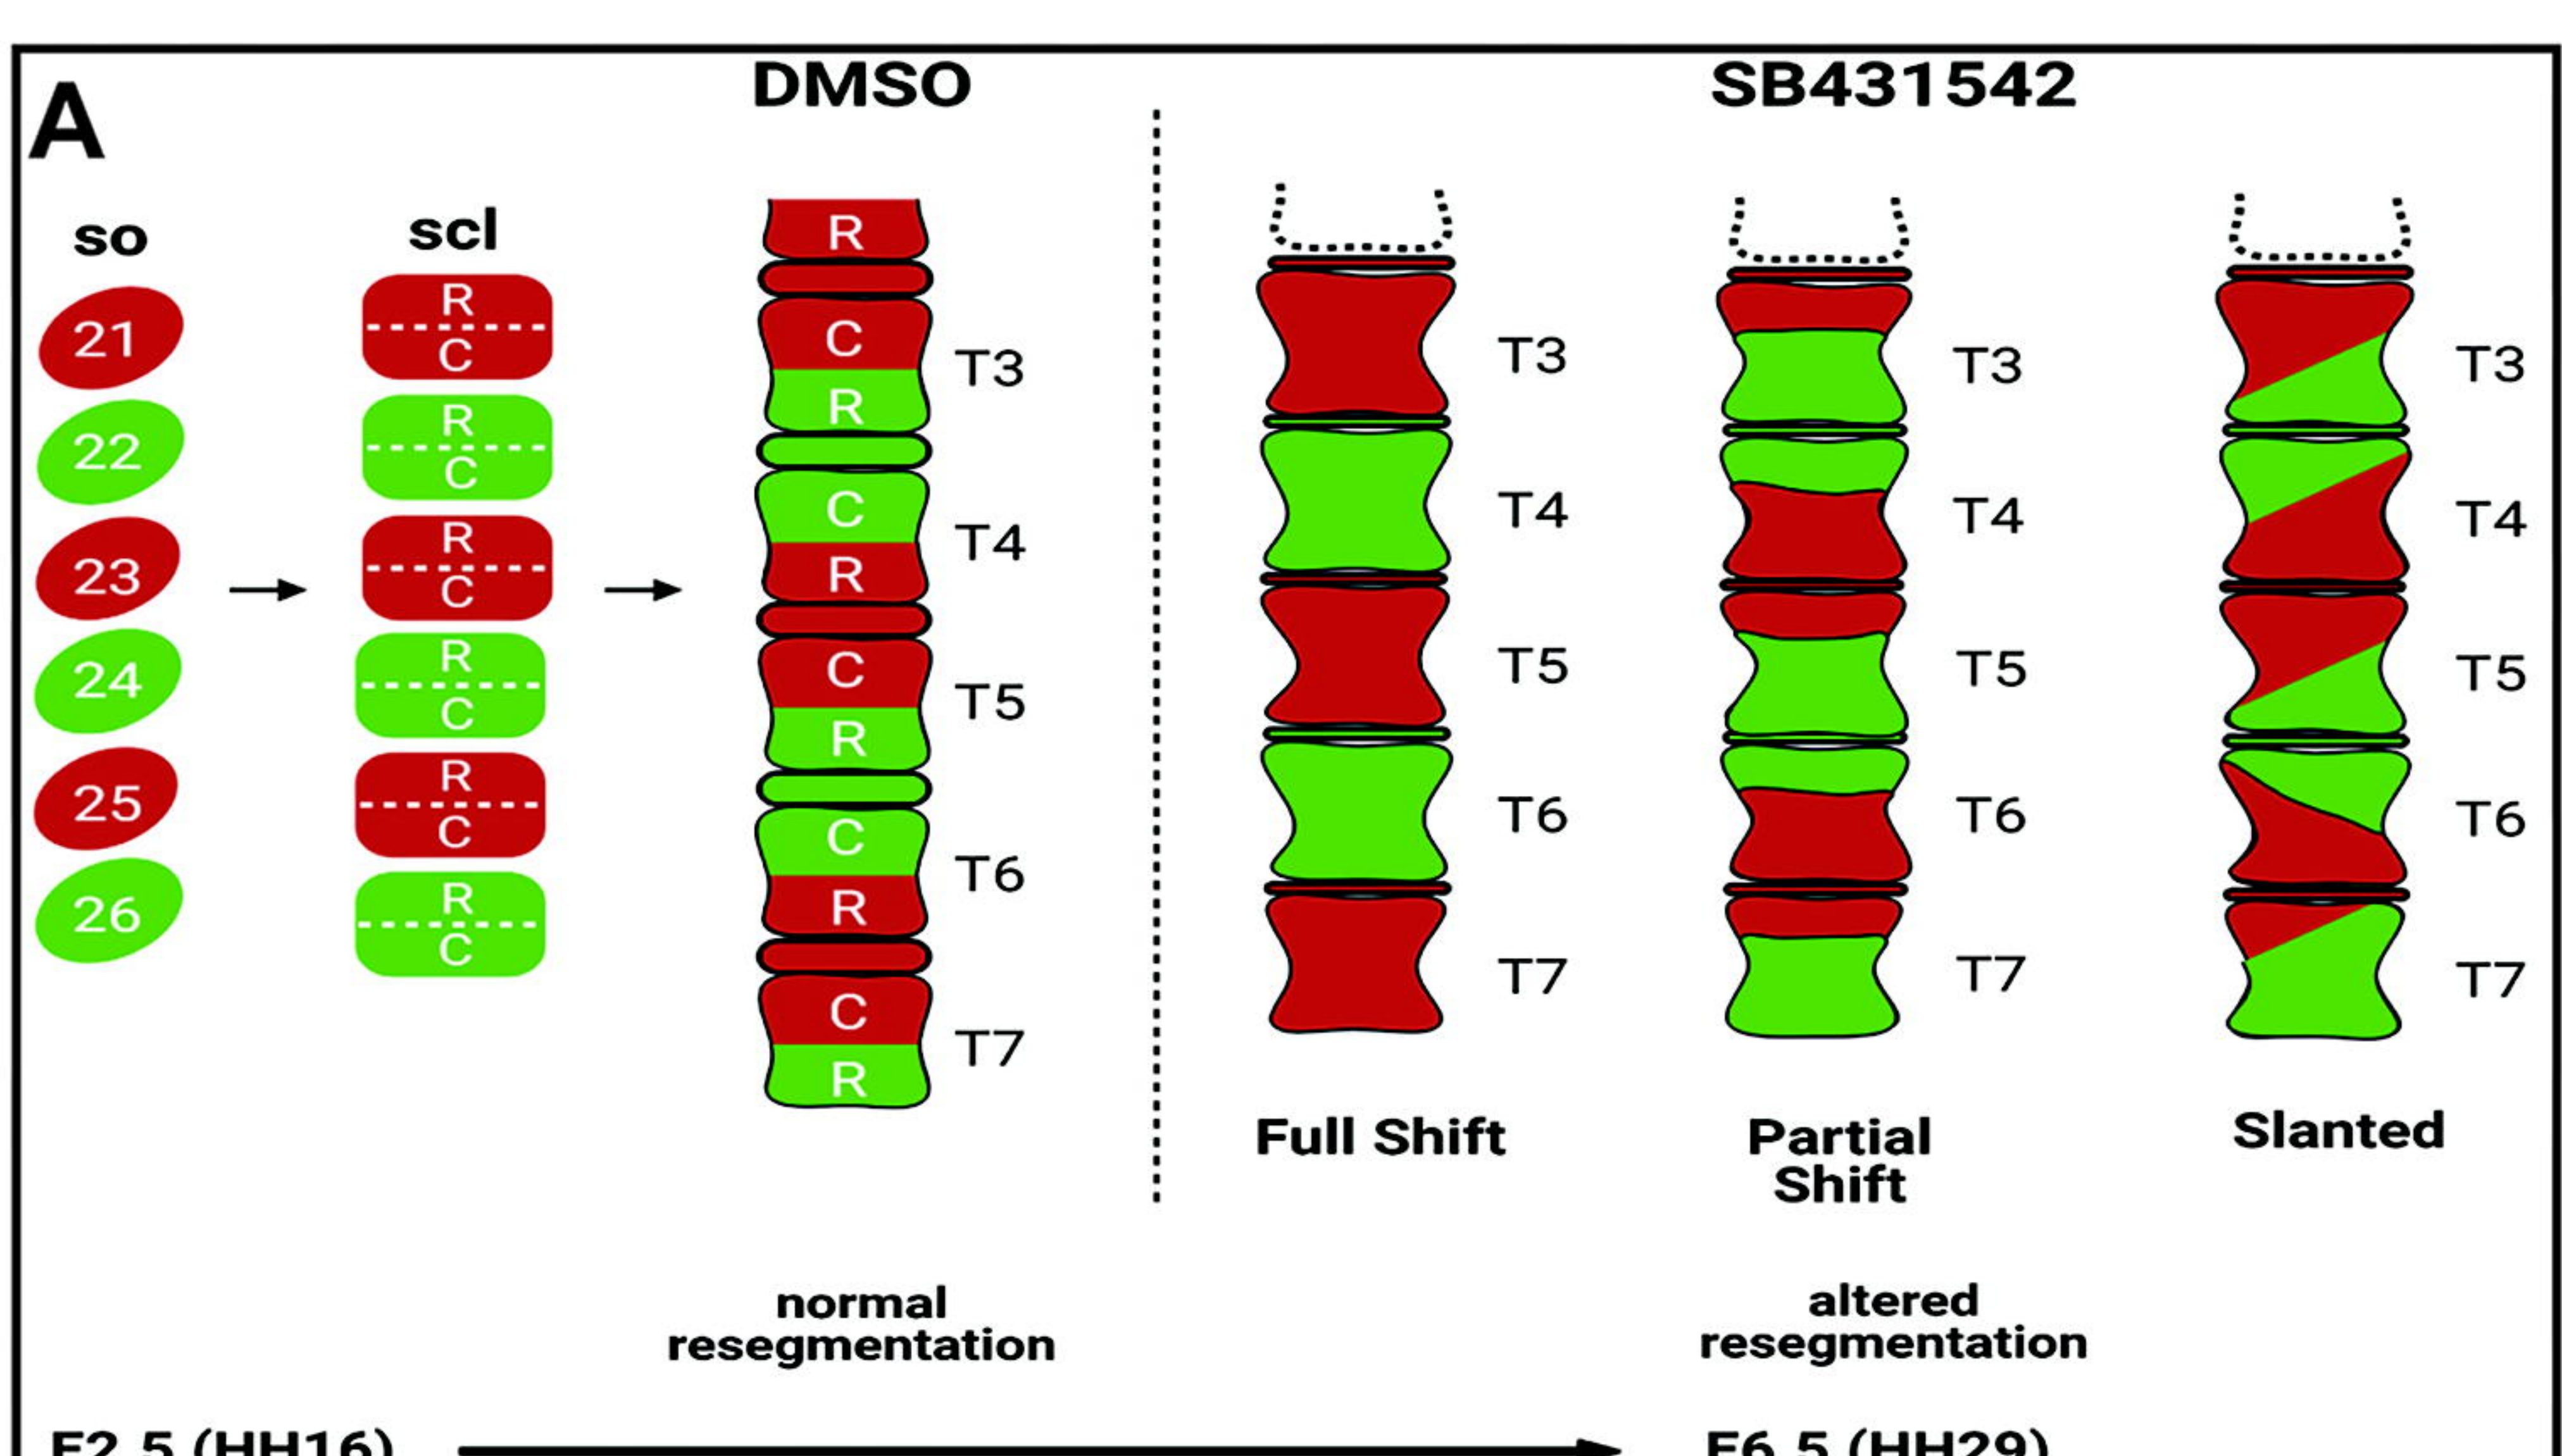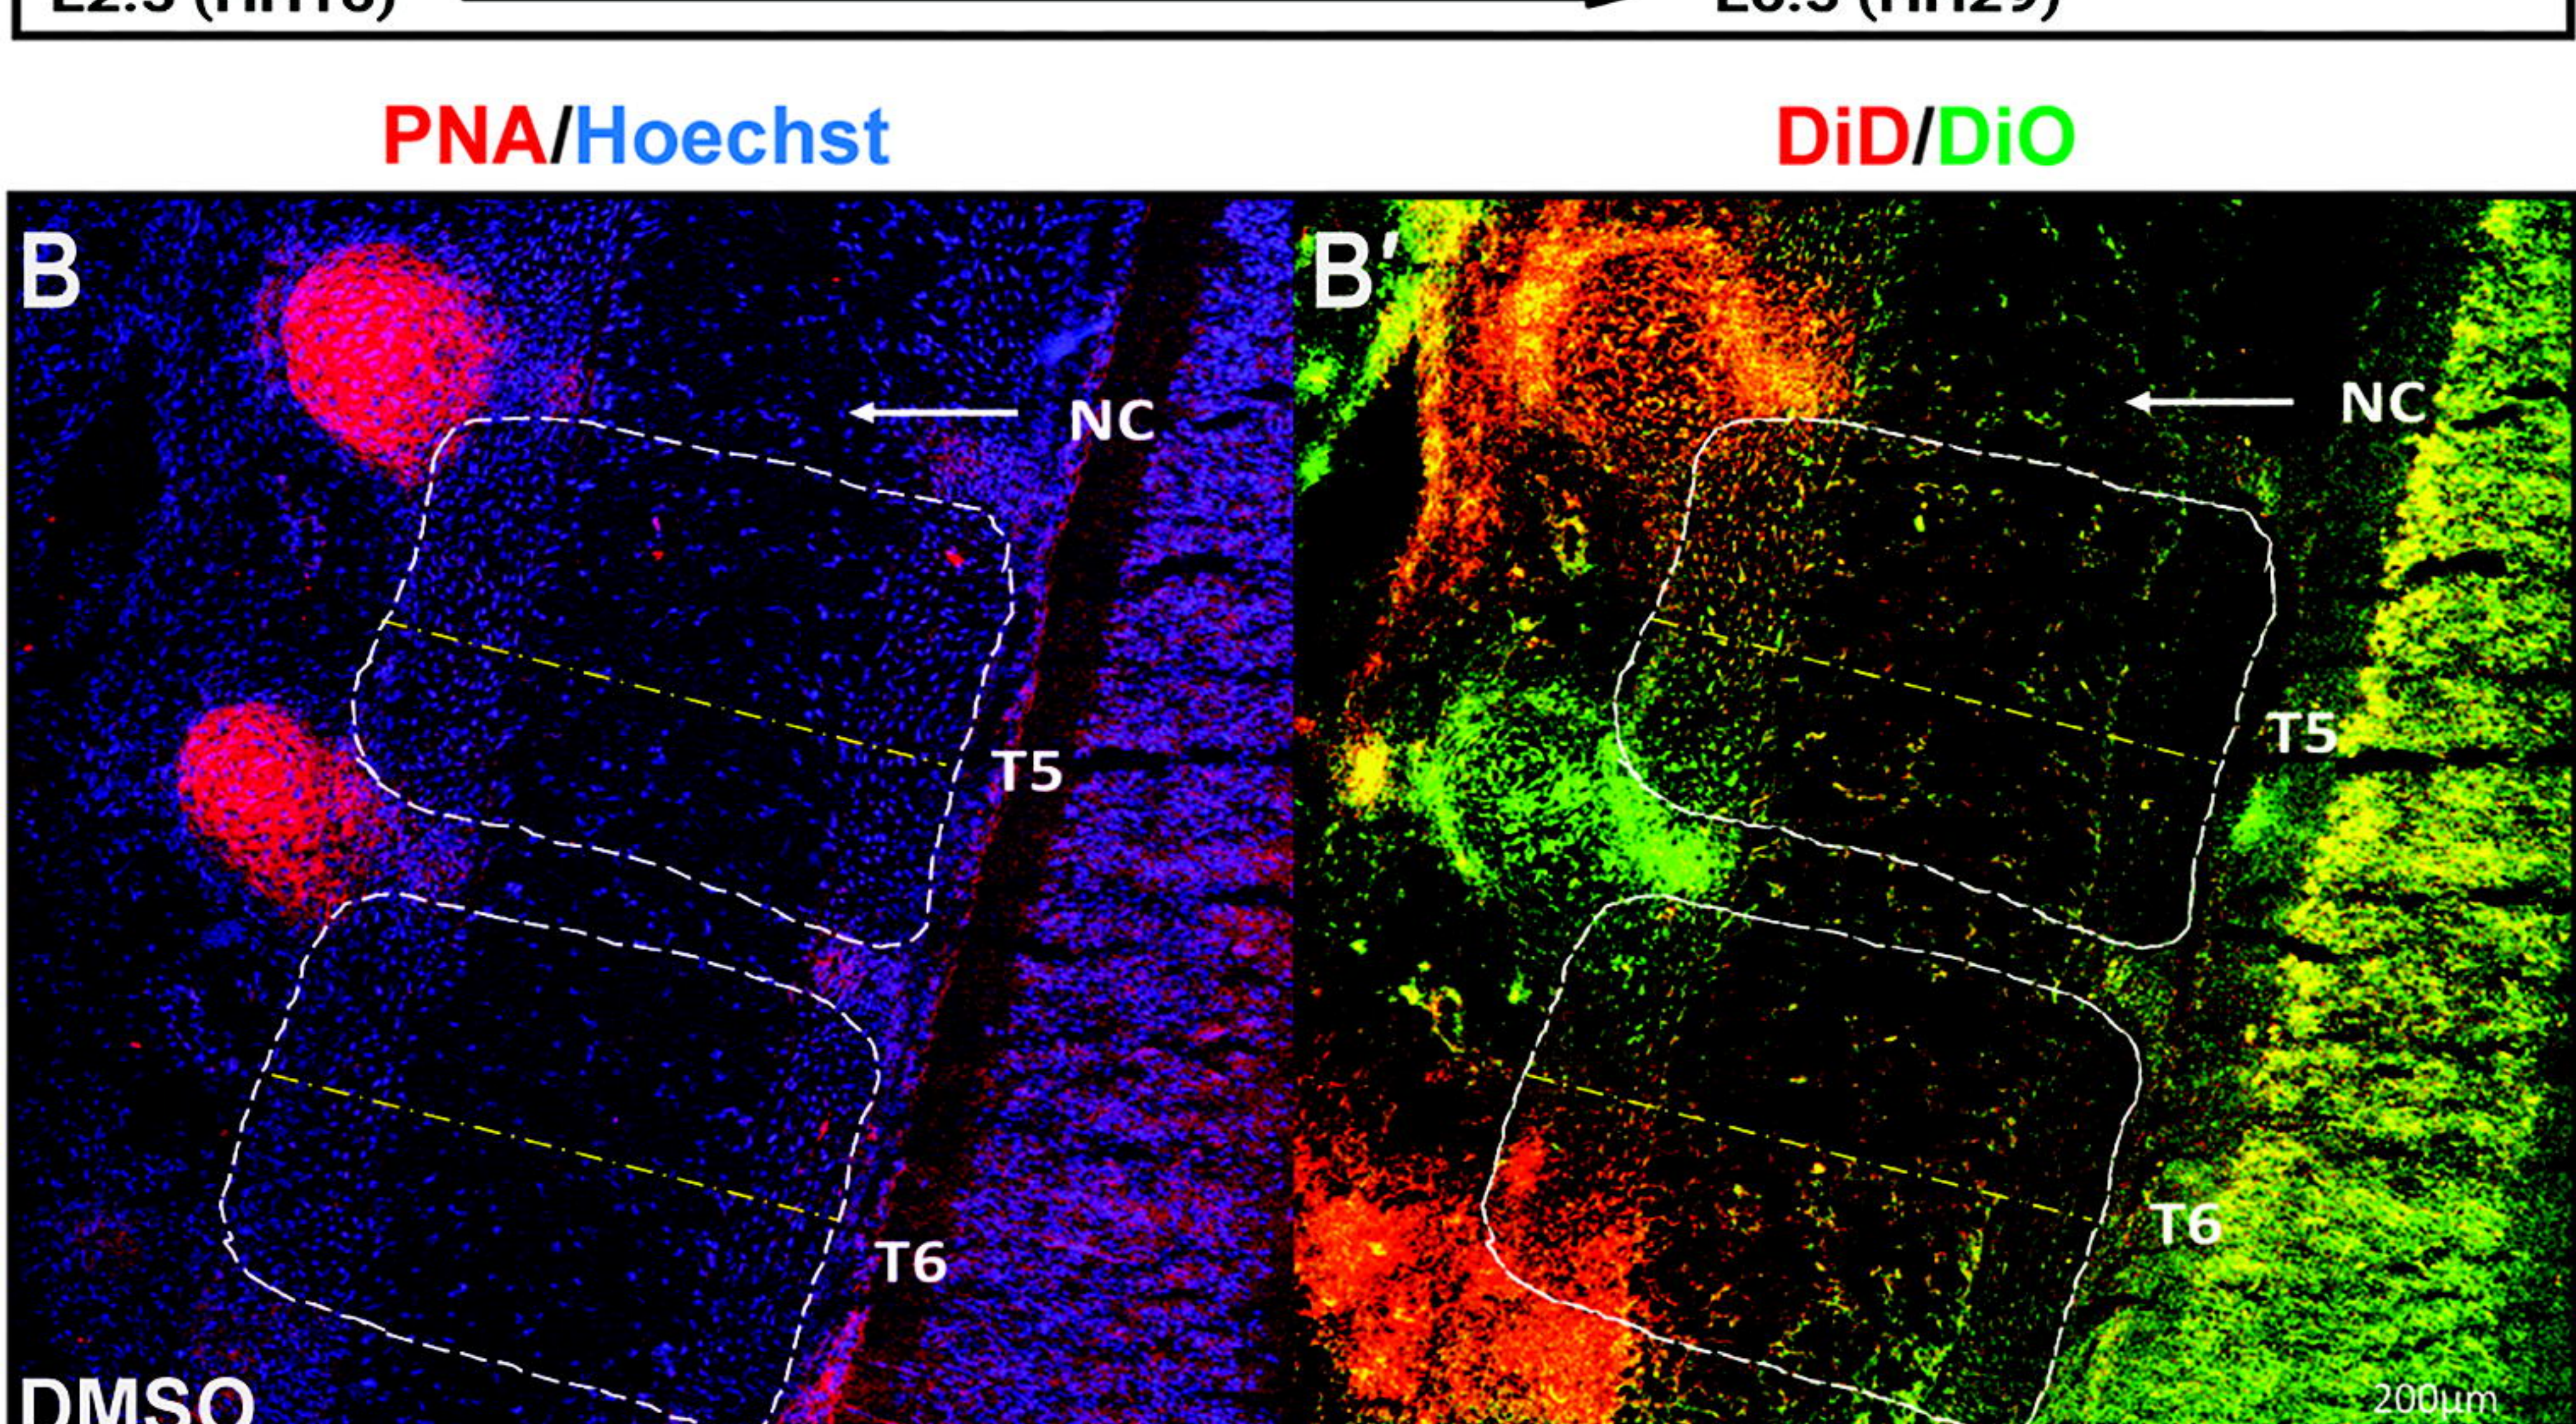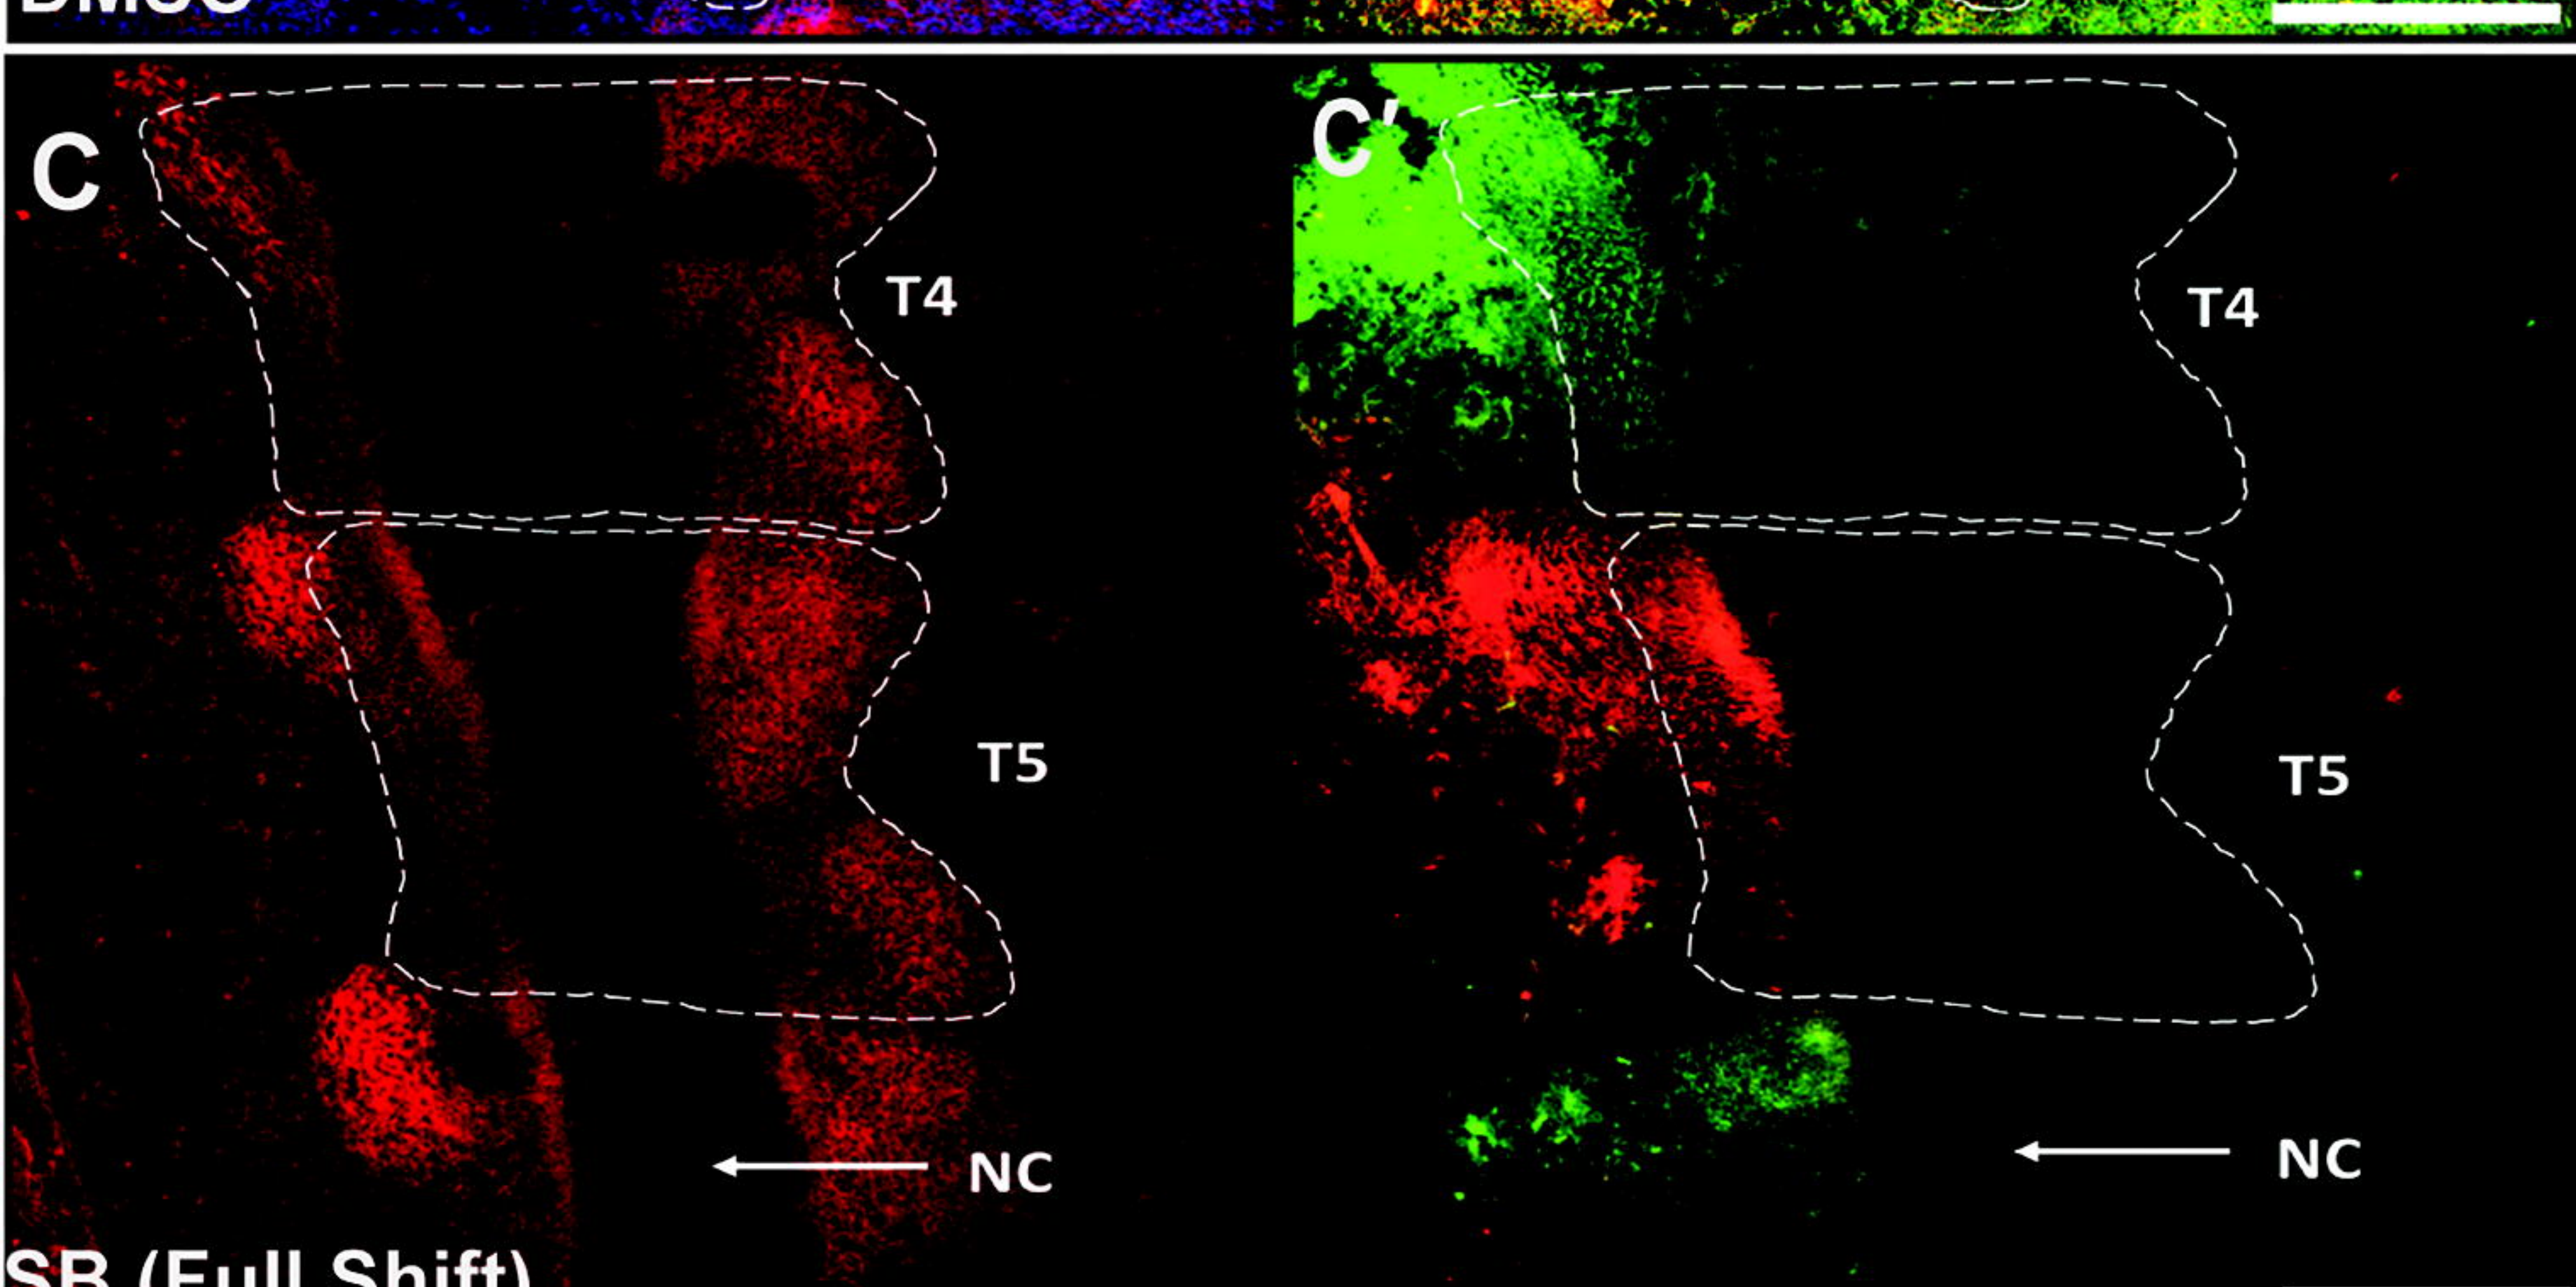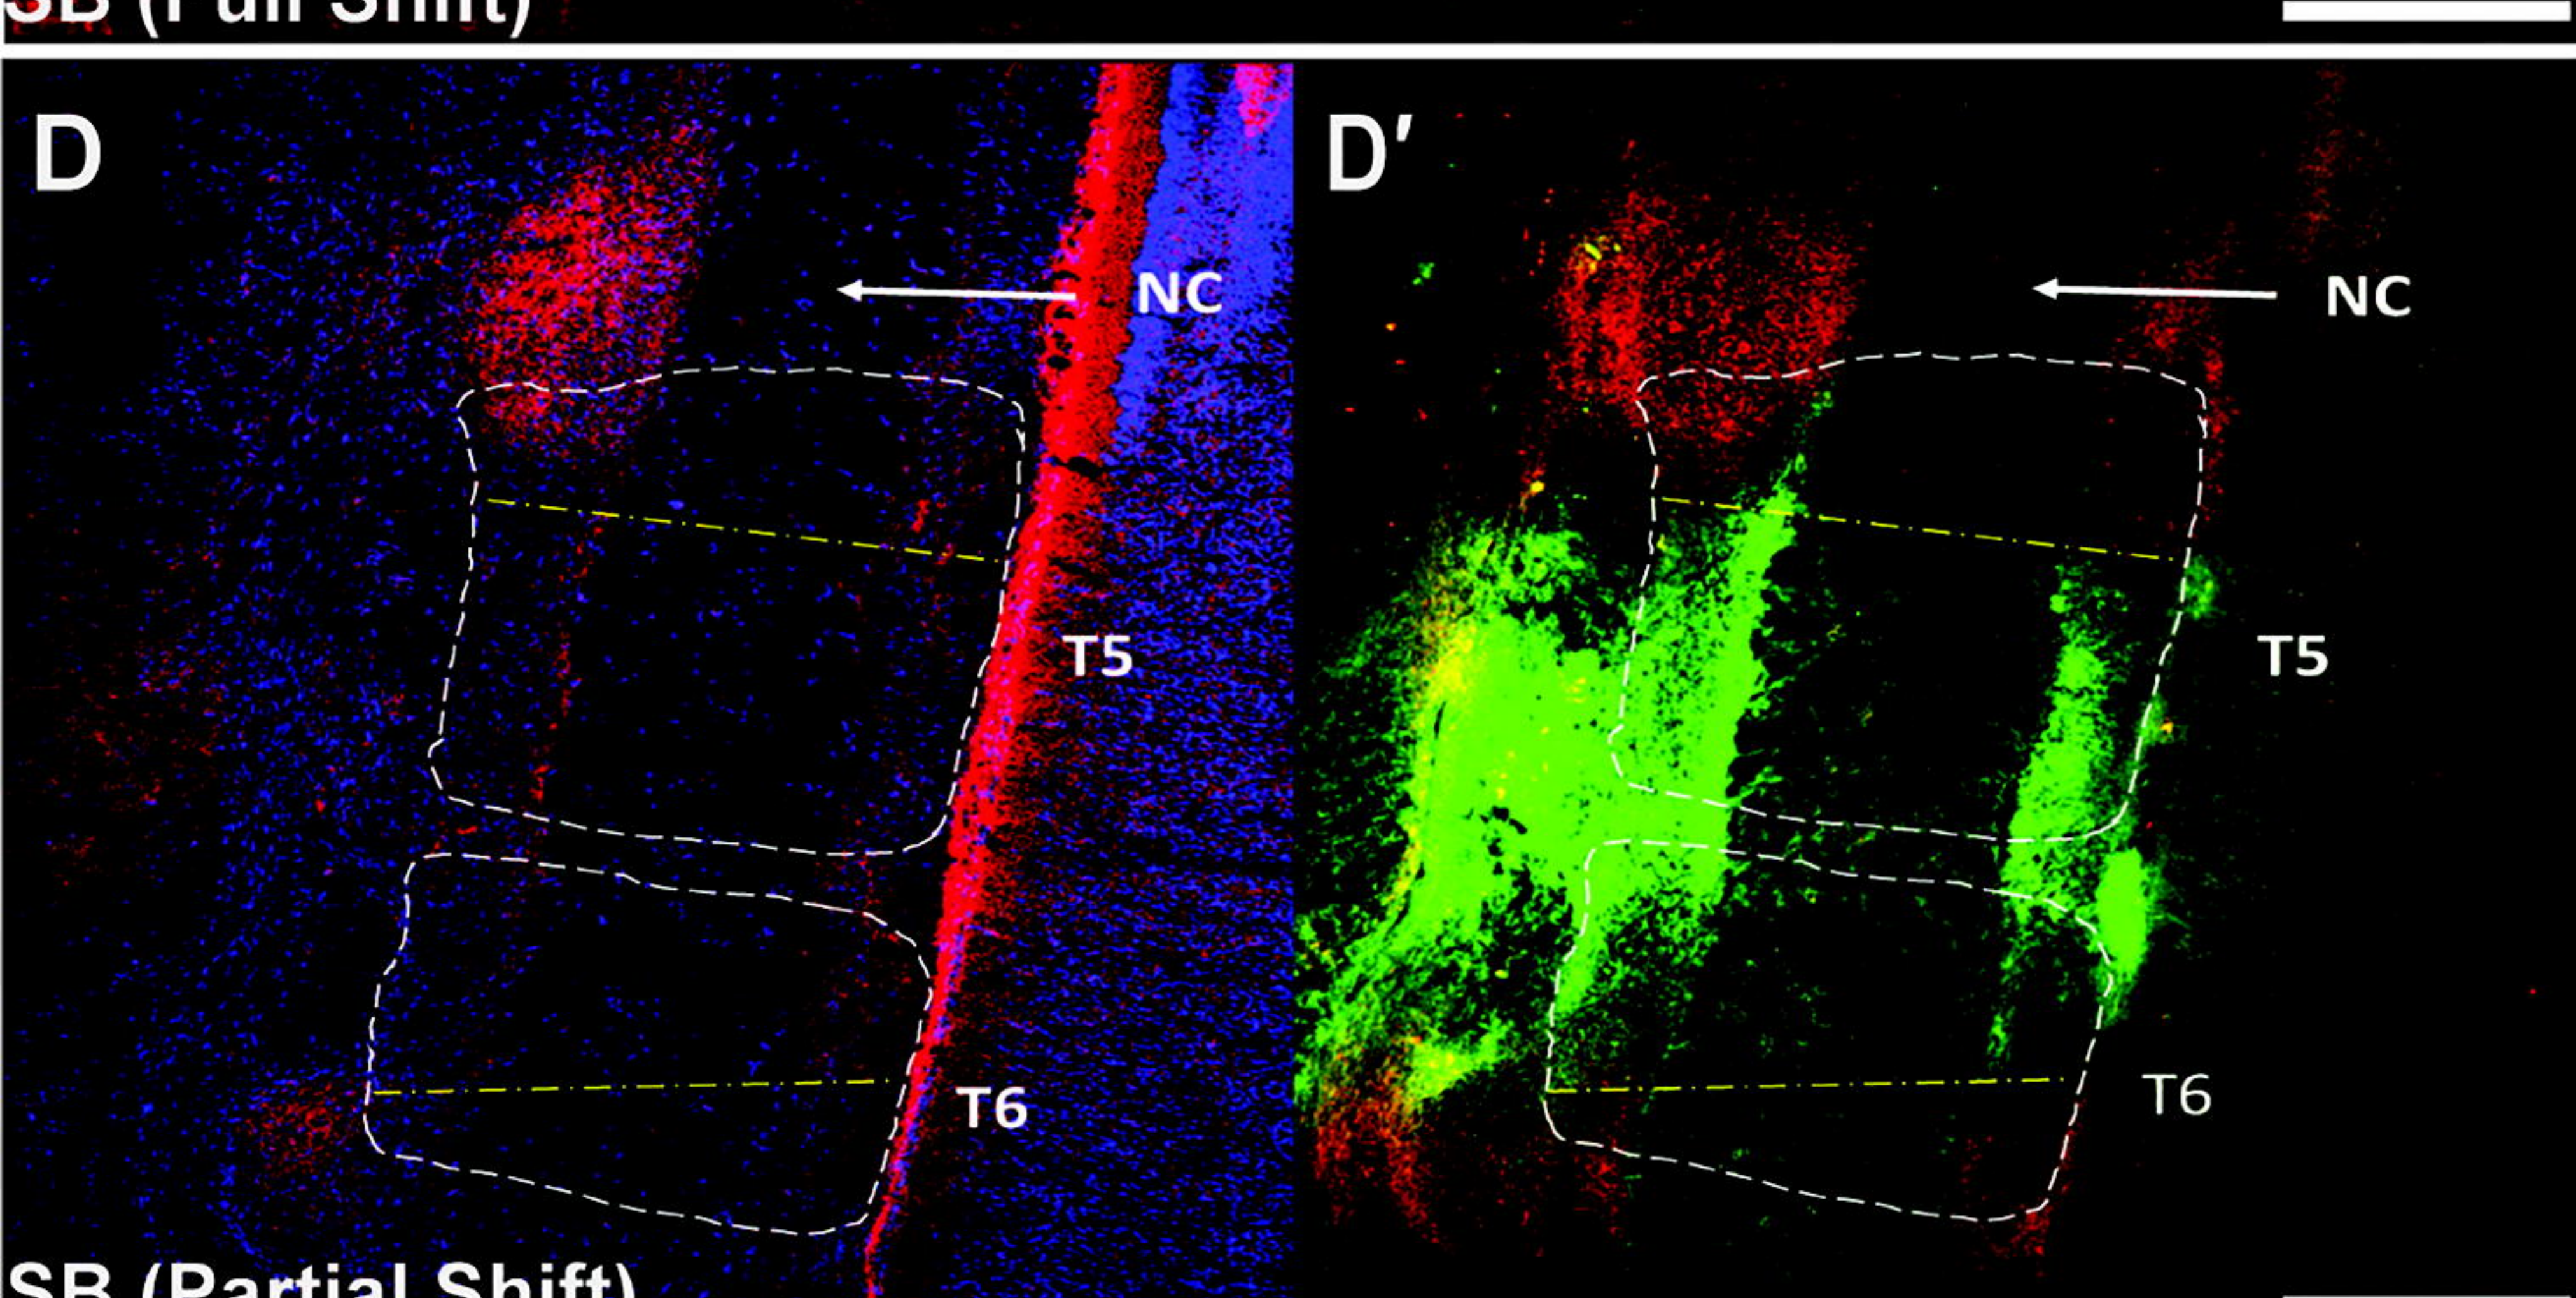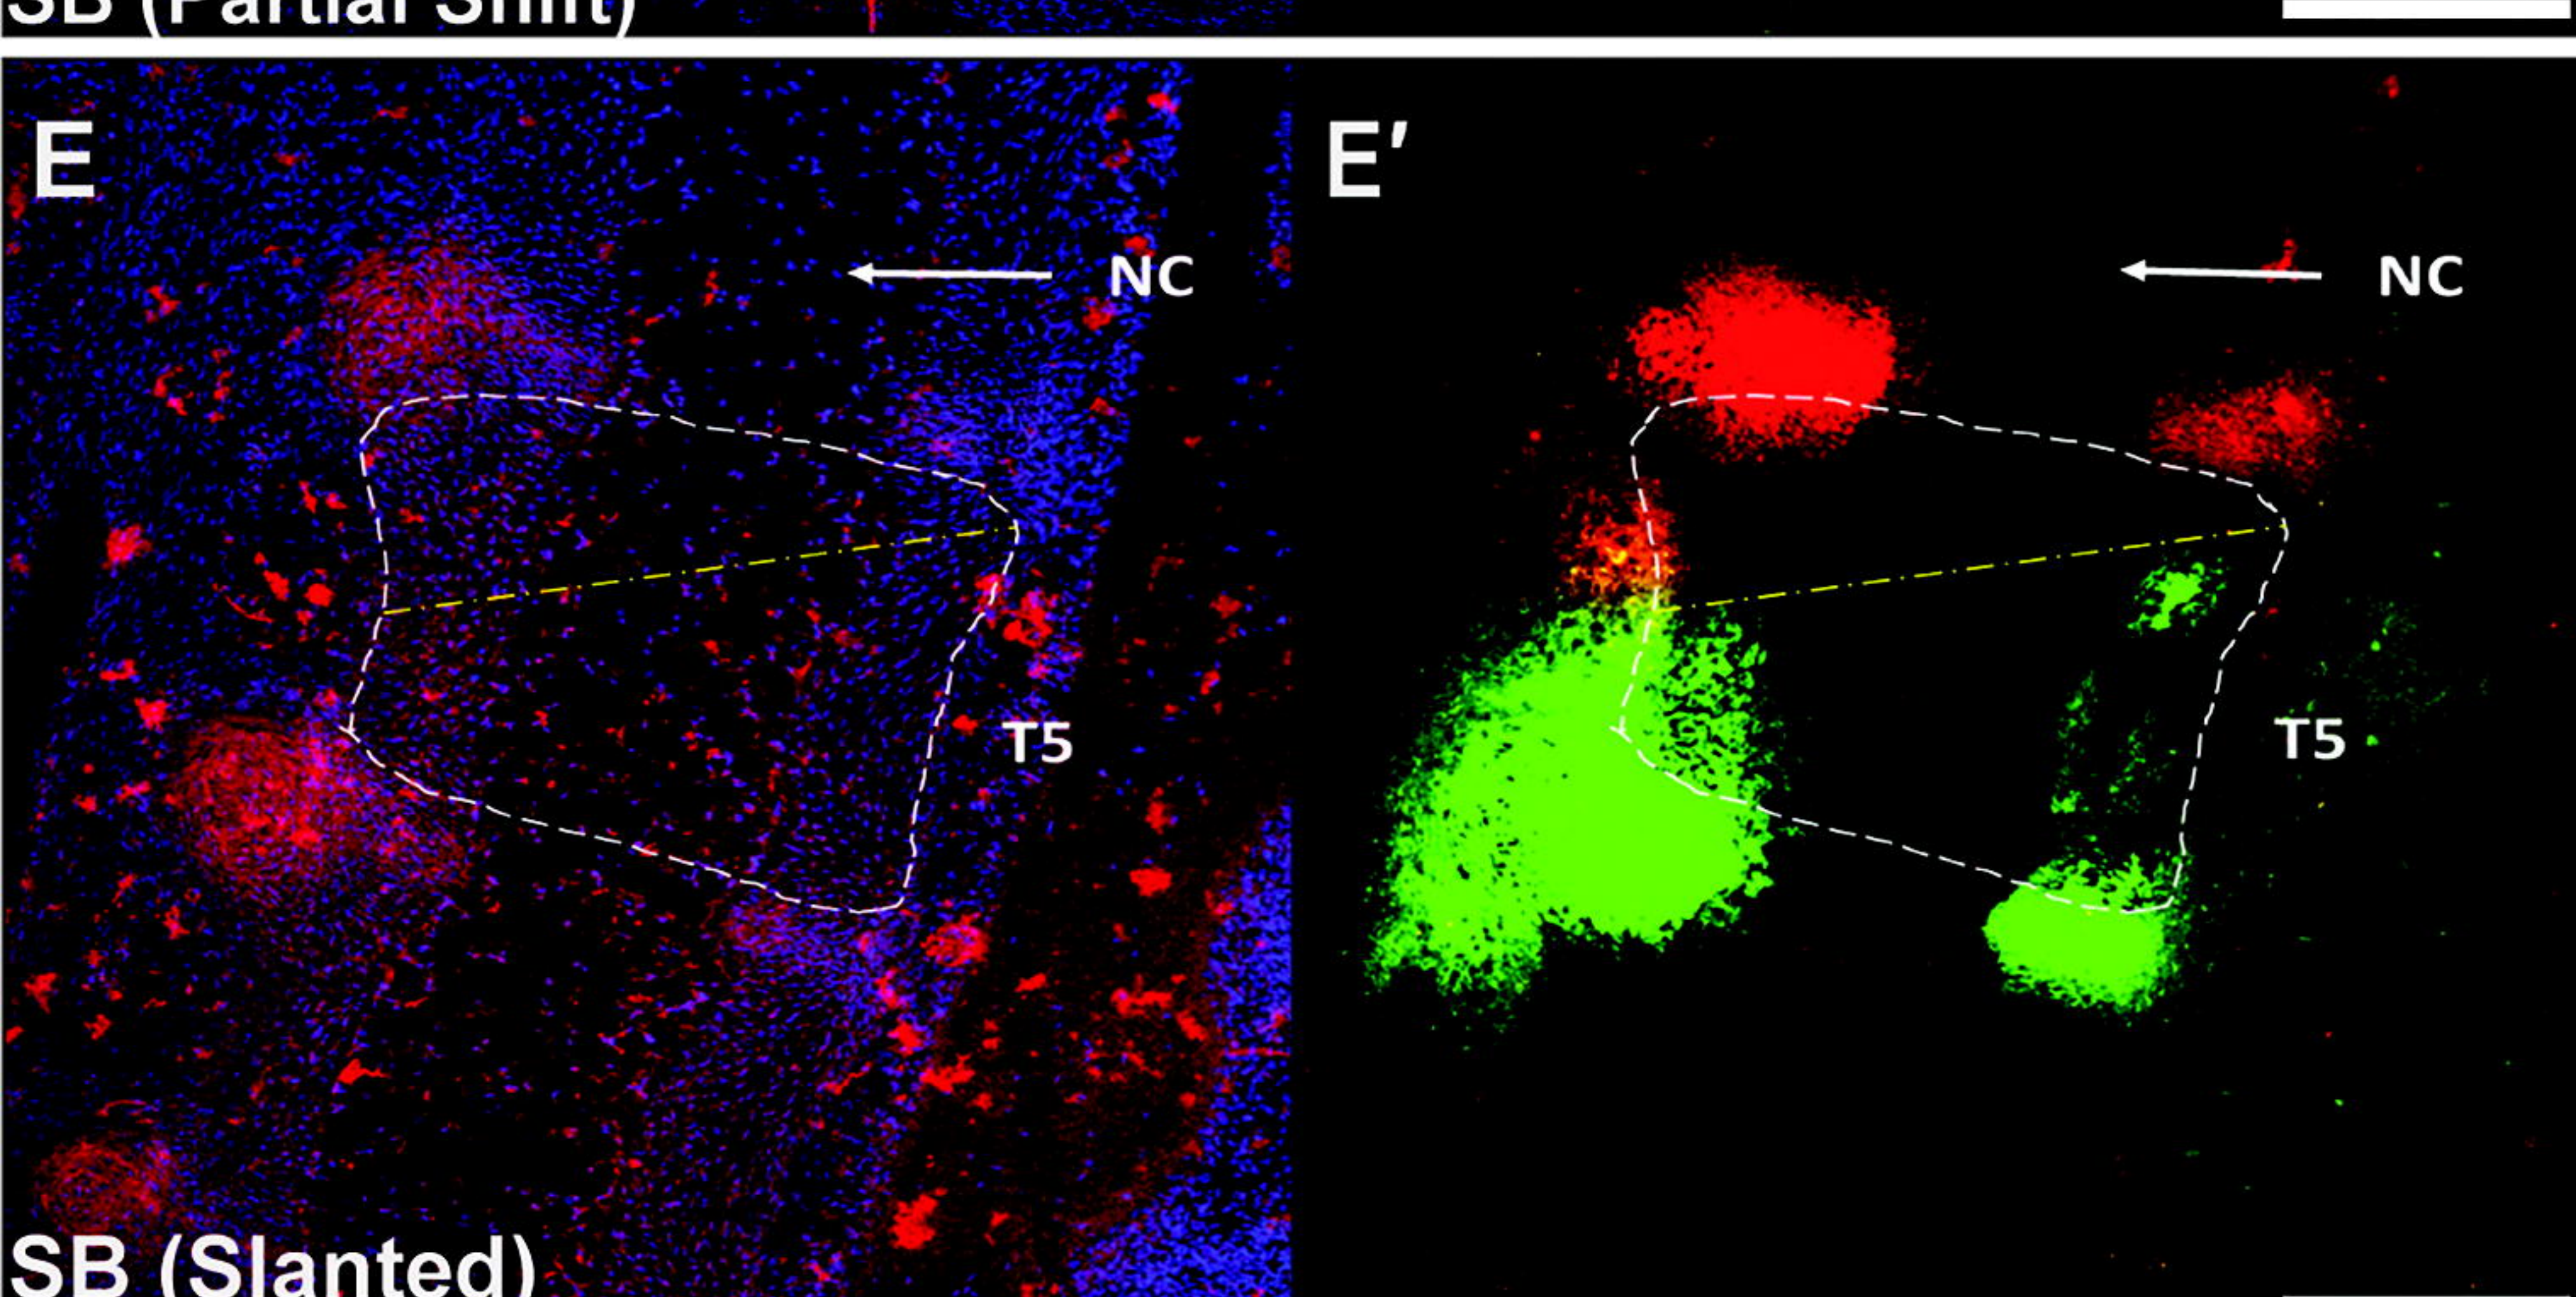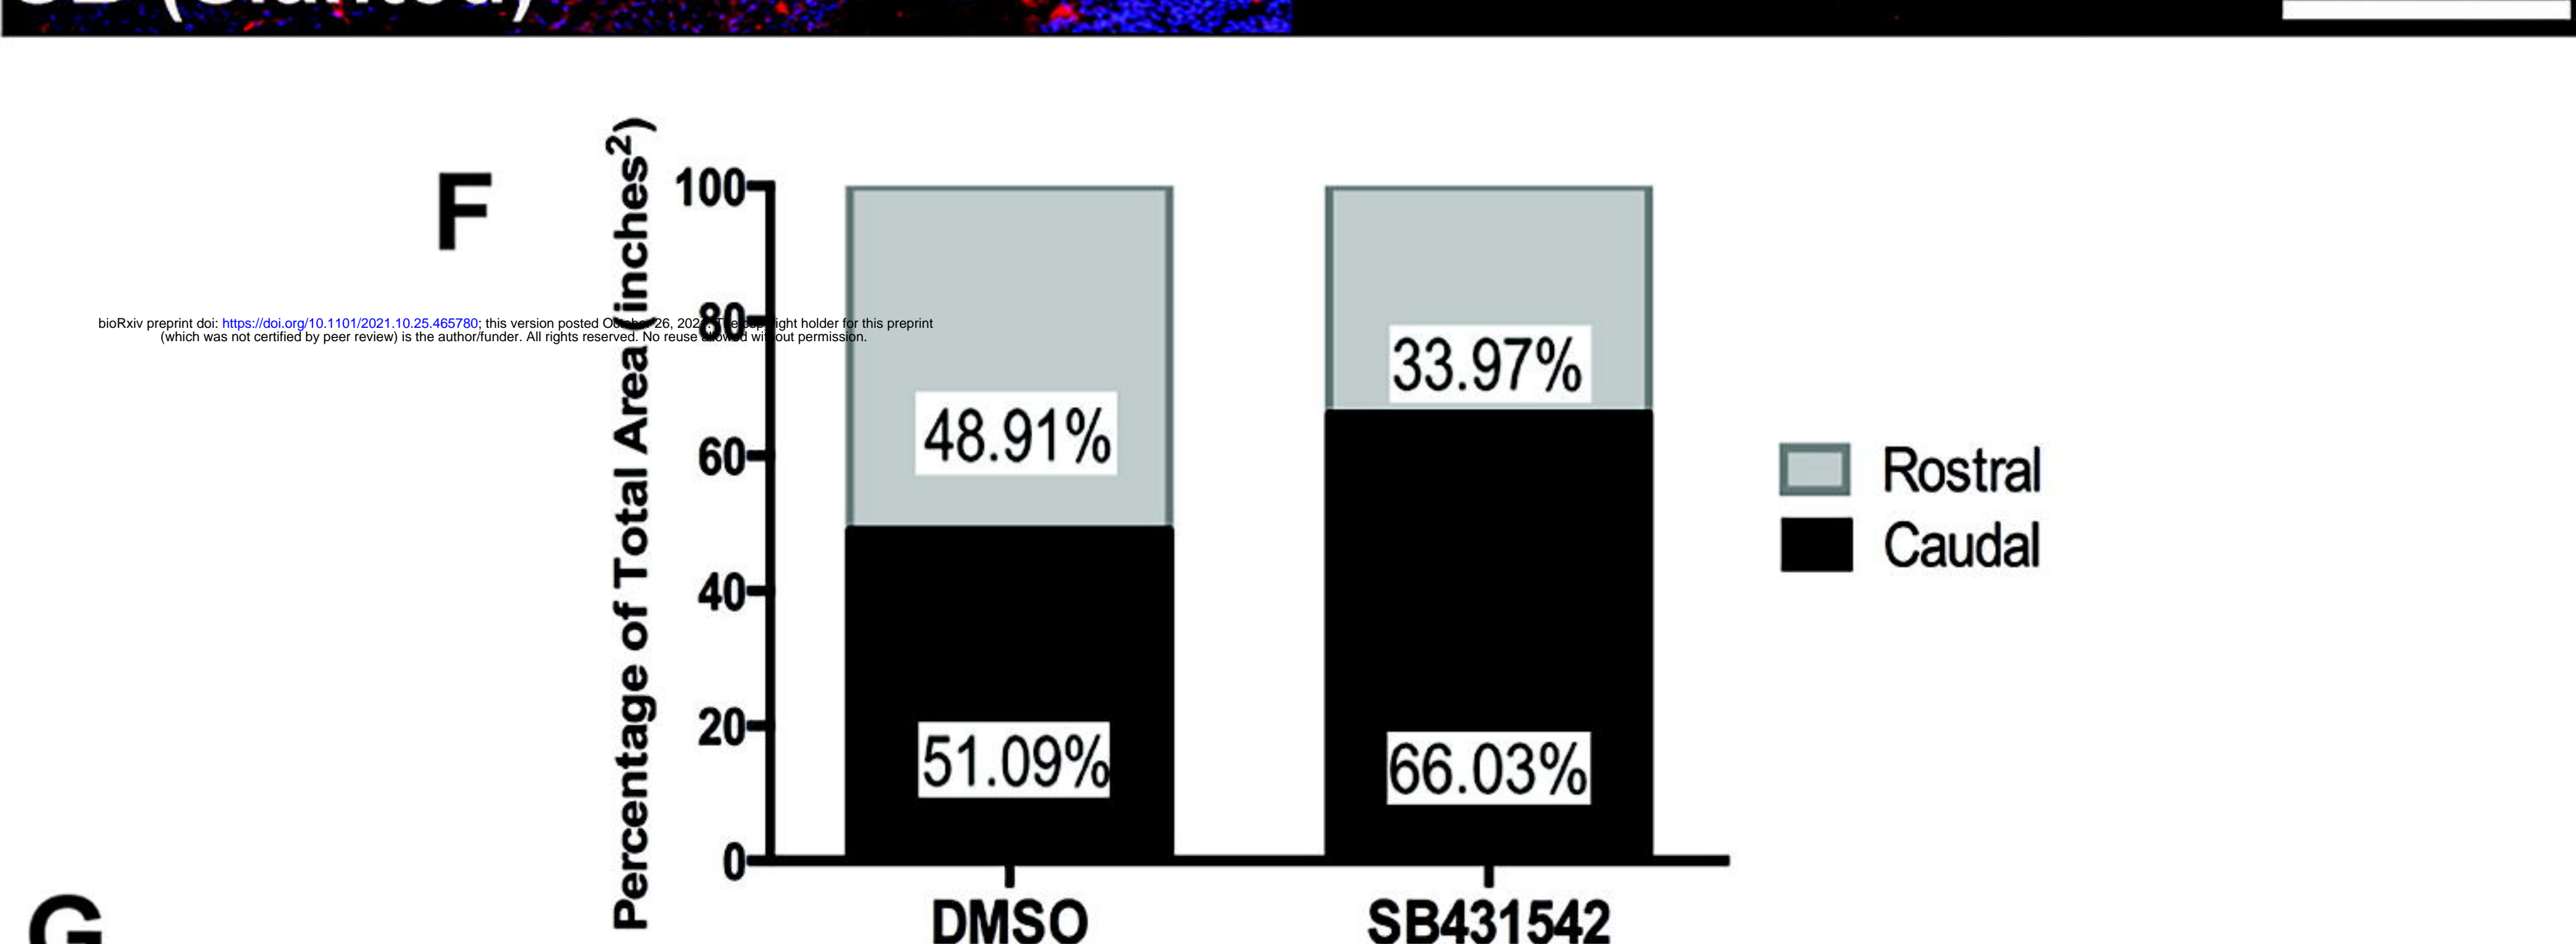

**G**

| Comparisons                 | Mean 1 | Mean 2 | Mean Difference | p < 0.05 |
|-----------------------------|--------|--------|-----------------|----------|
| DMSO Rostral vs DMSO Caudal | 48.91  | 51.09  | -2.188          | no       |
| DMSO Rostral vs SB Rostral  | 48.91  | 33.97  | 14.94           | yes      |
| DMSO Caudal vs SB Caudal    | 51.09  | 66.03  | -14.94          | yes      |
| SB Rostral vs SB Caudal     | 33.97  | 66.03  | -32.06          | yes      |



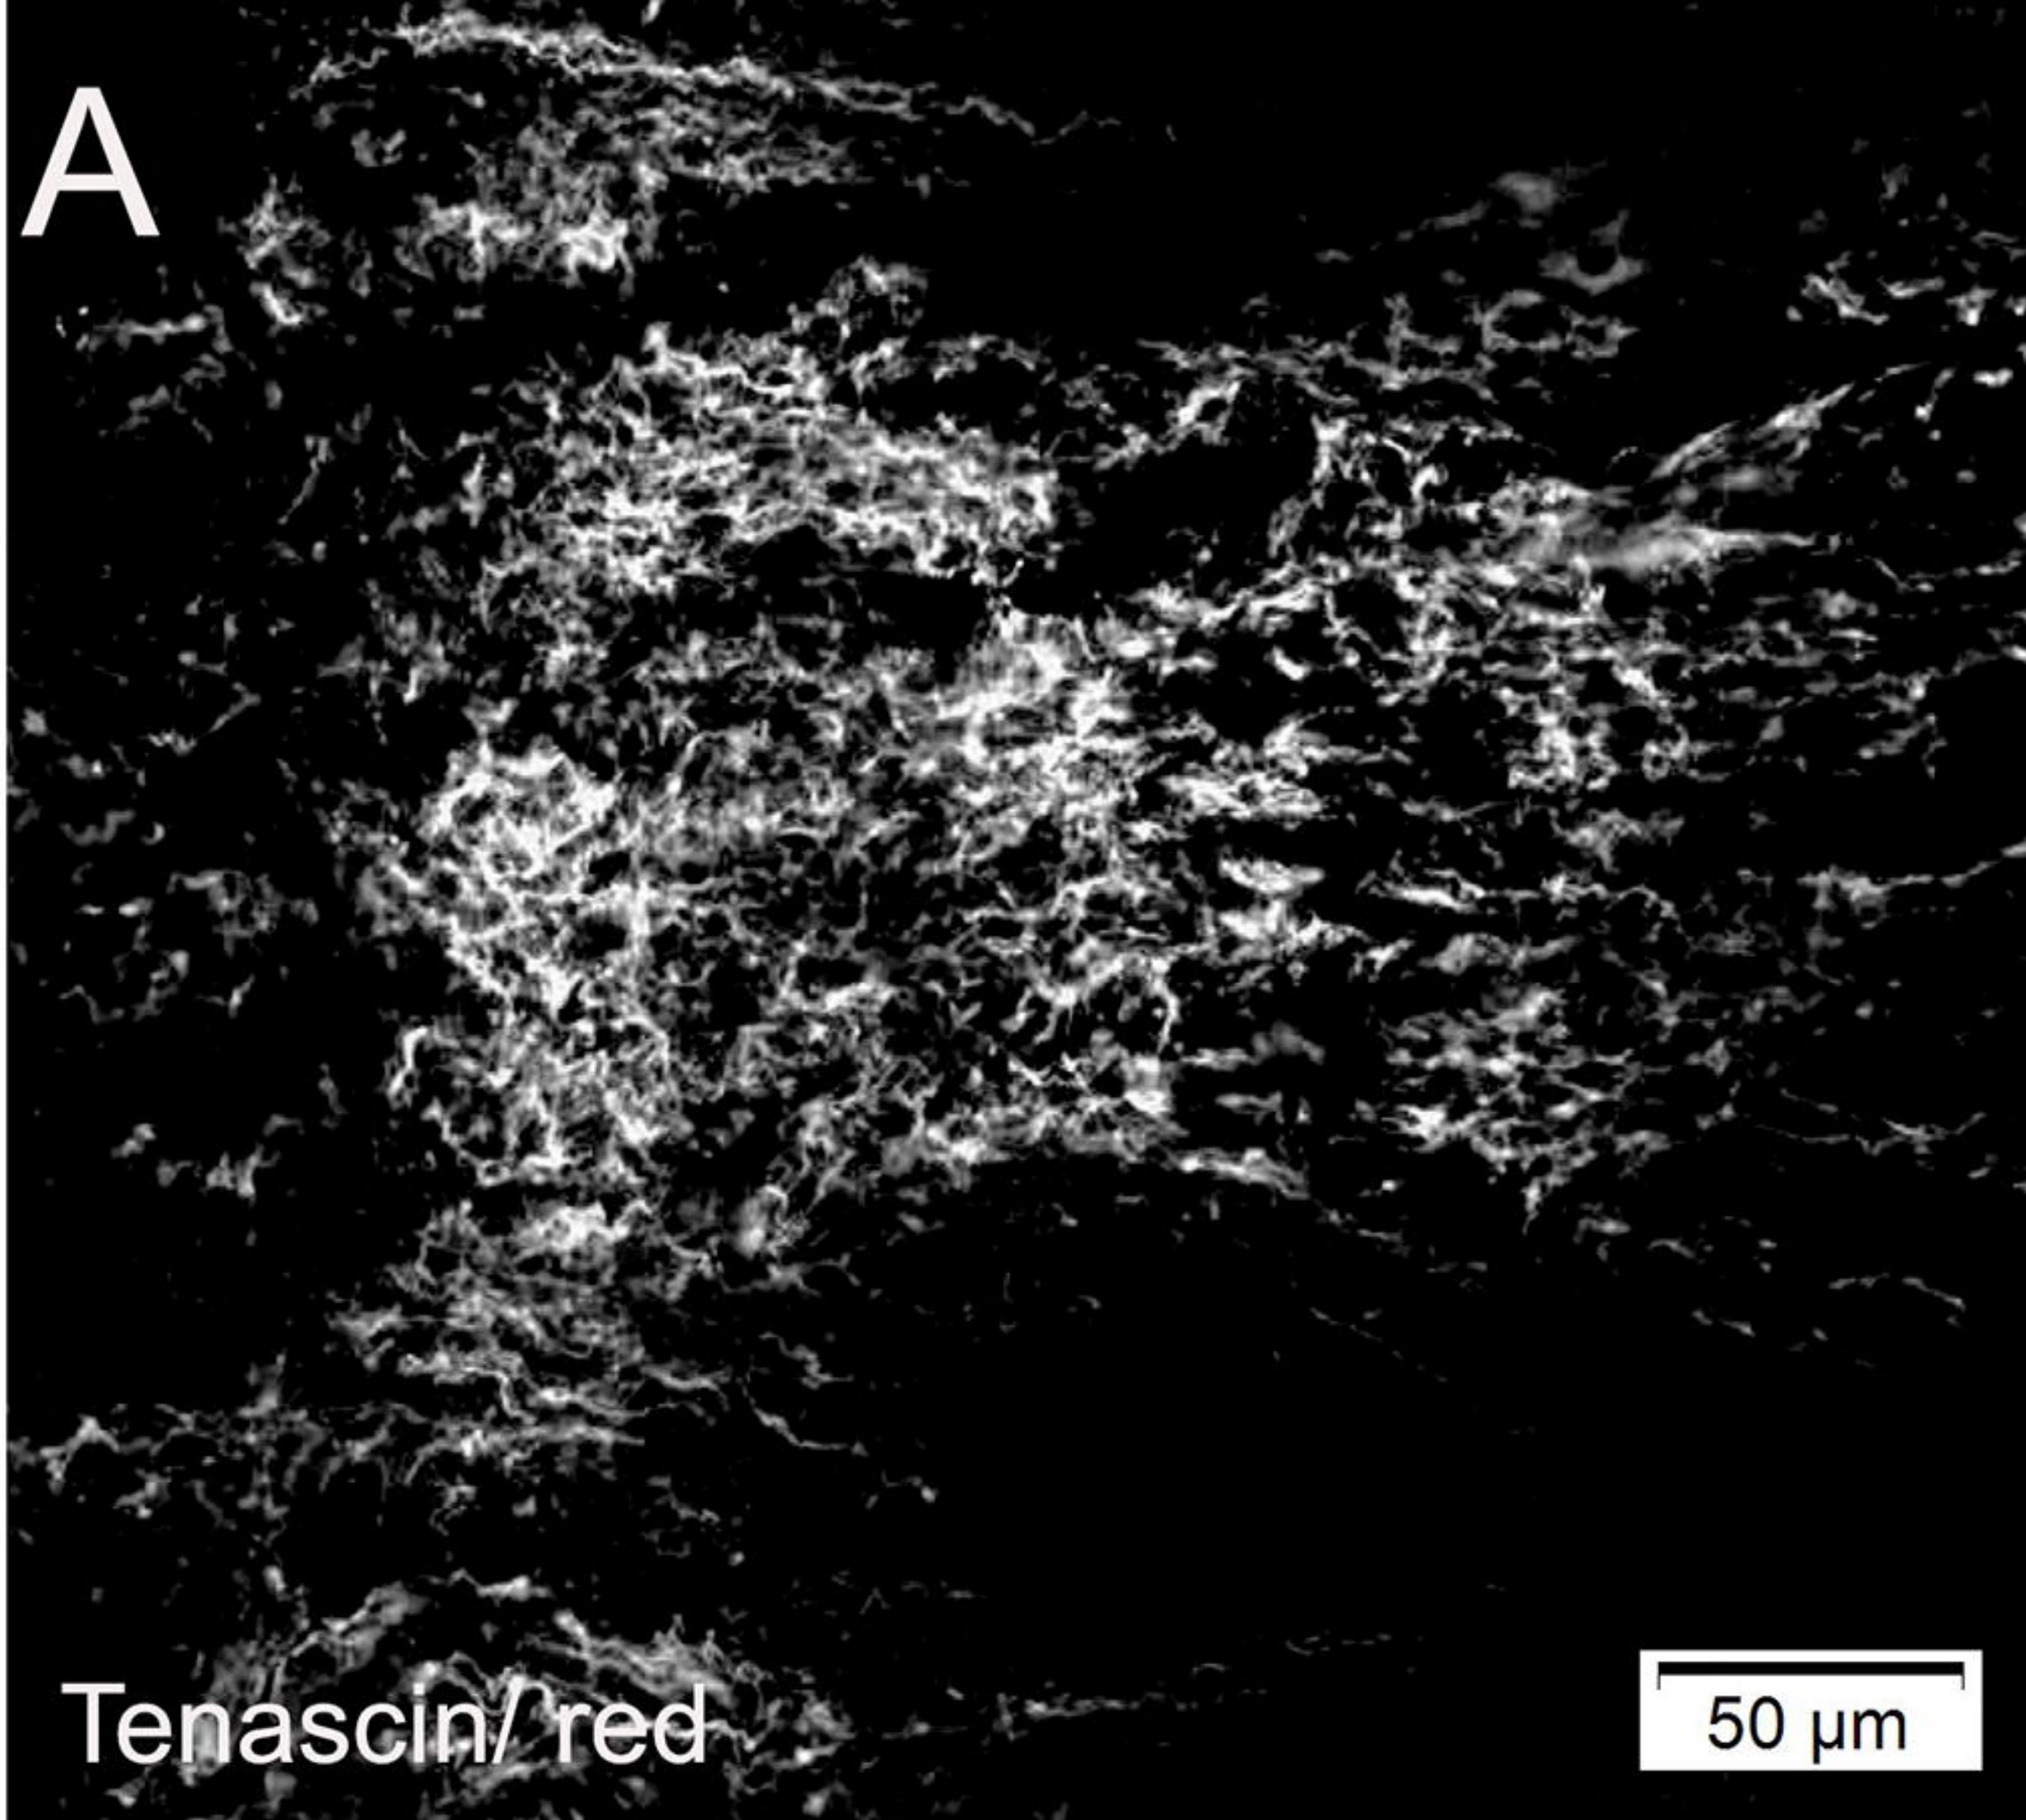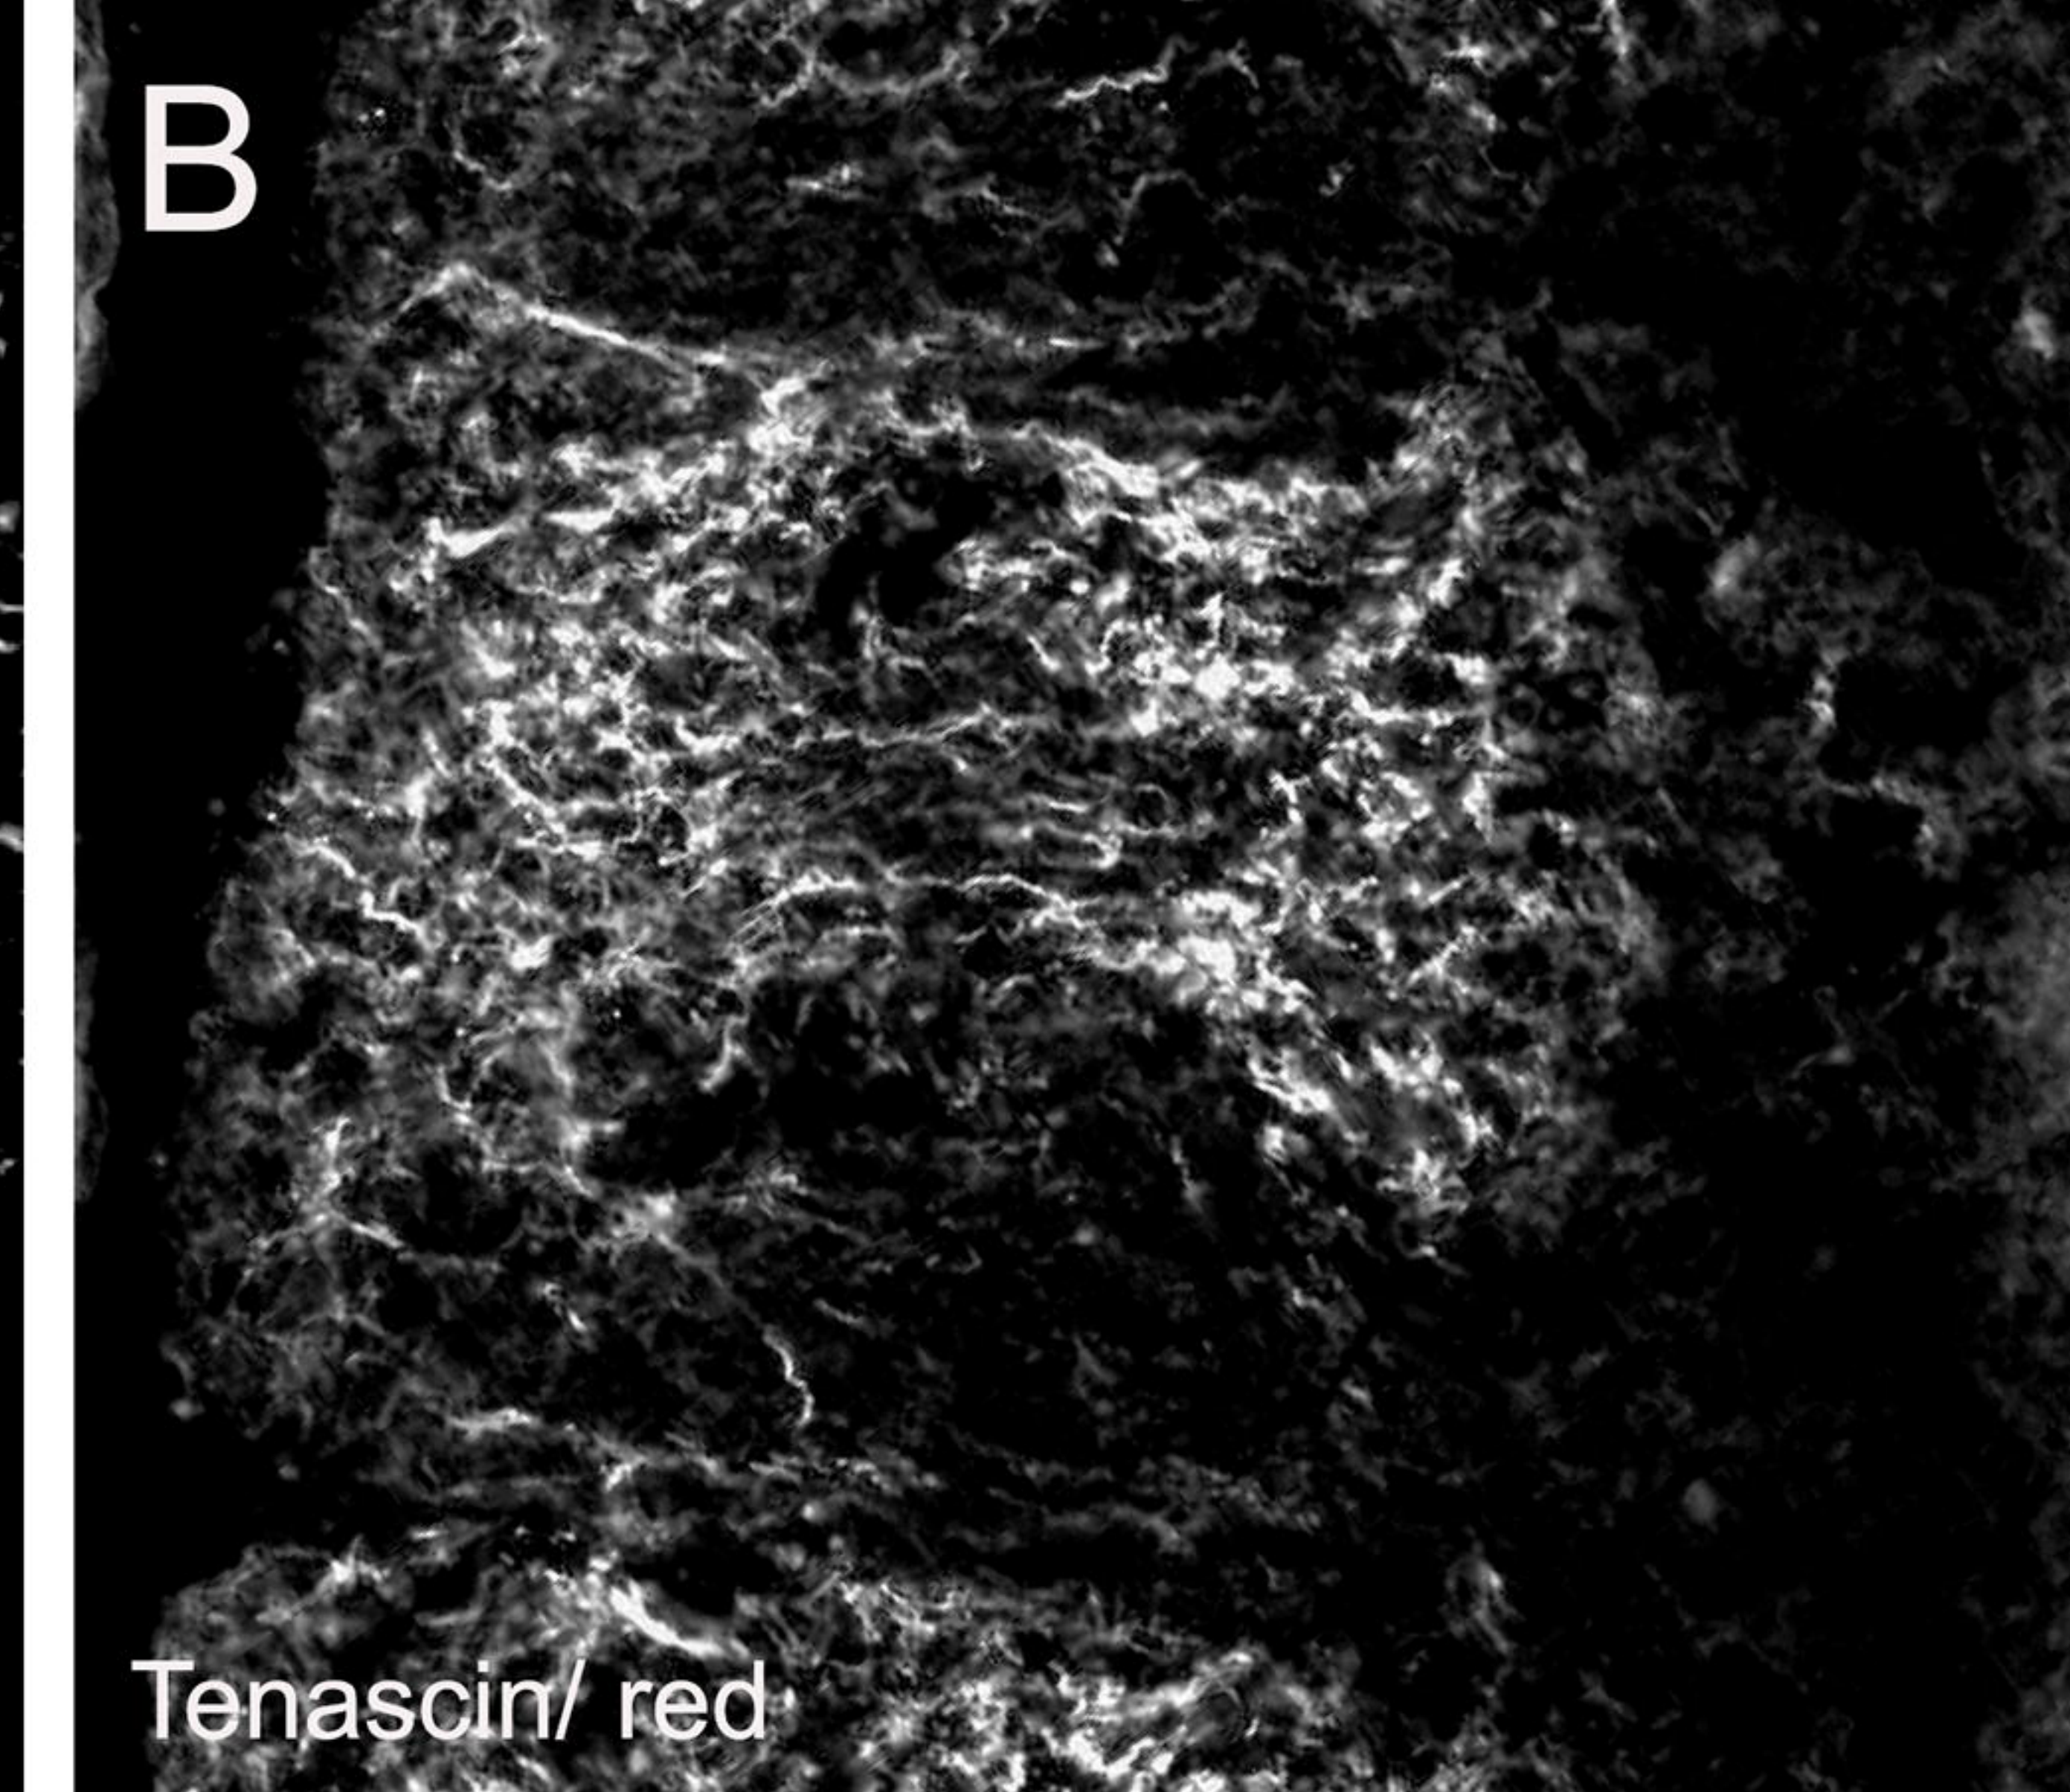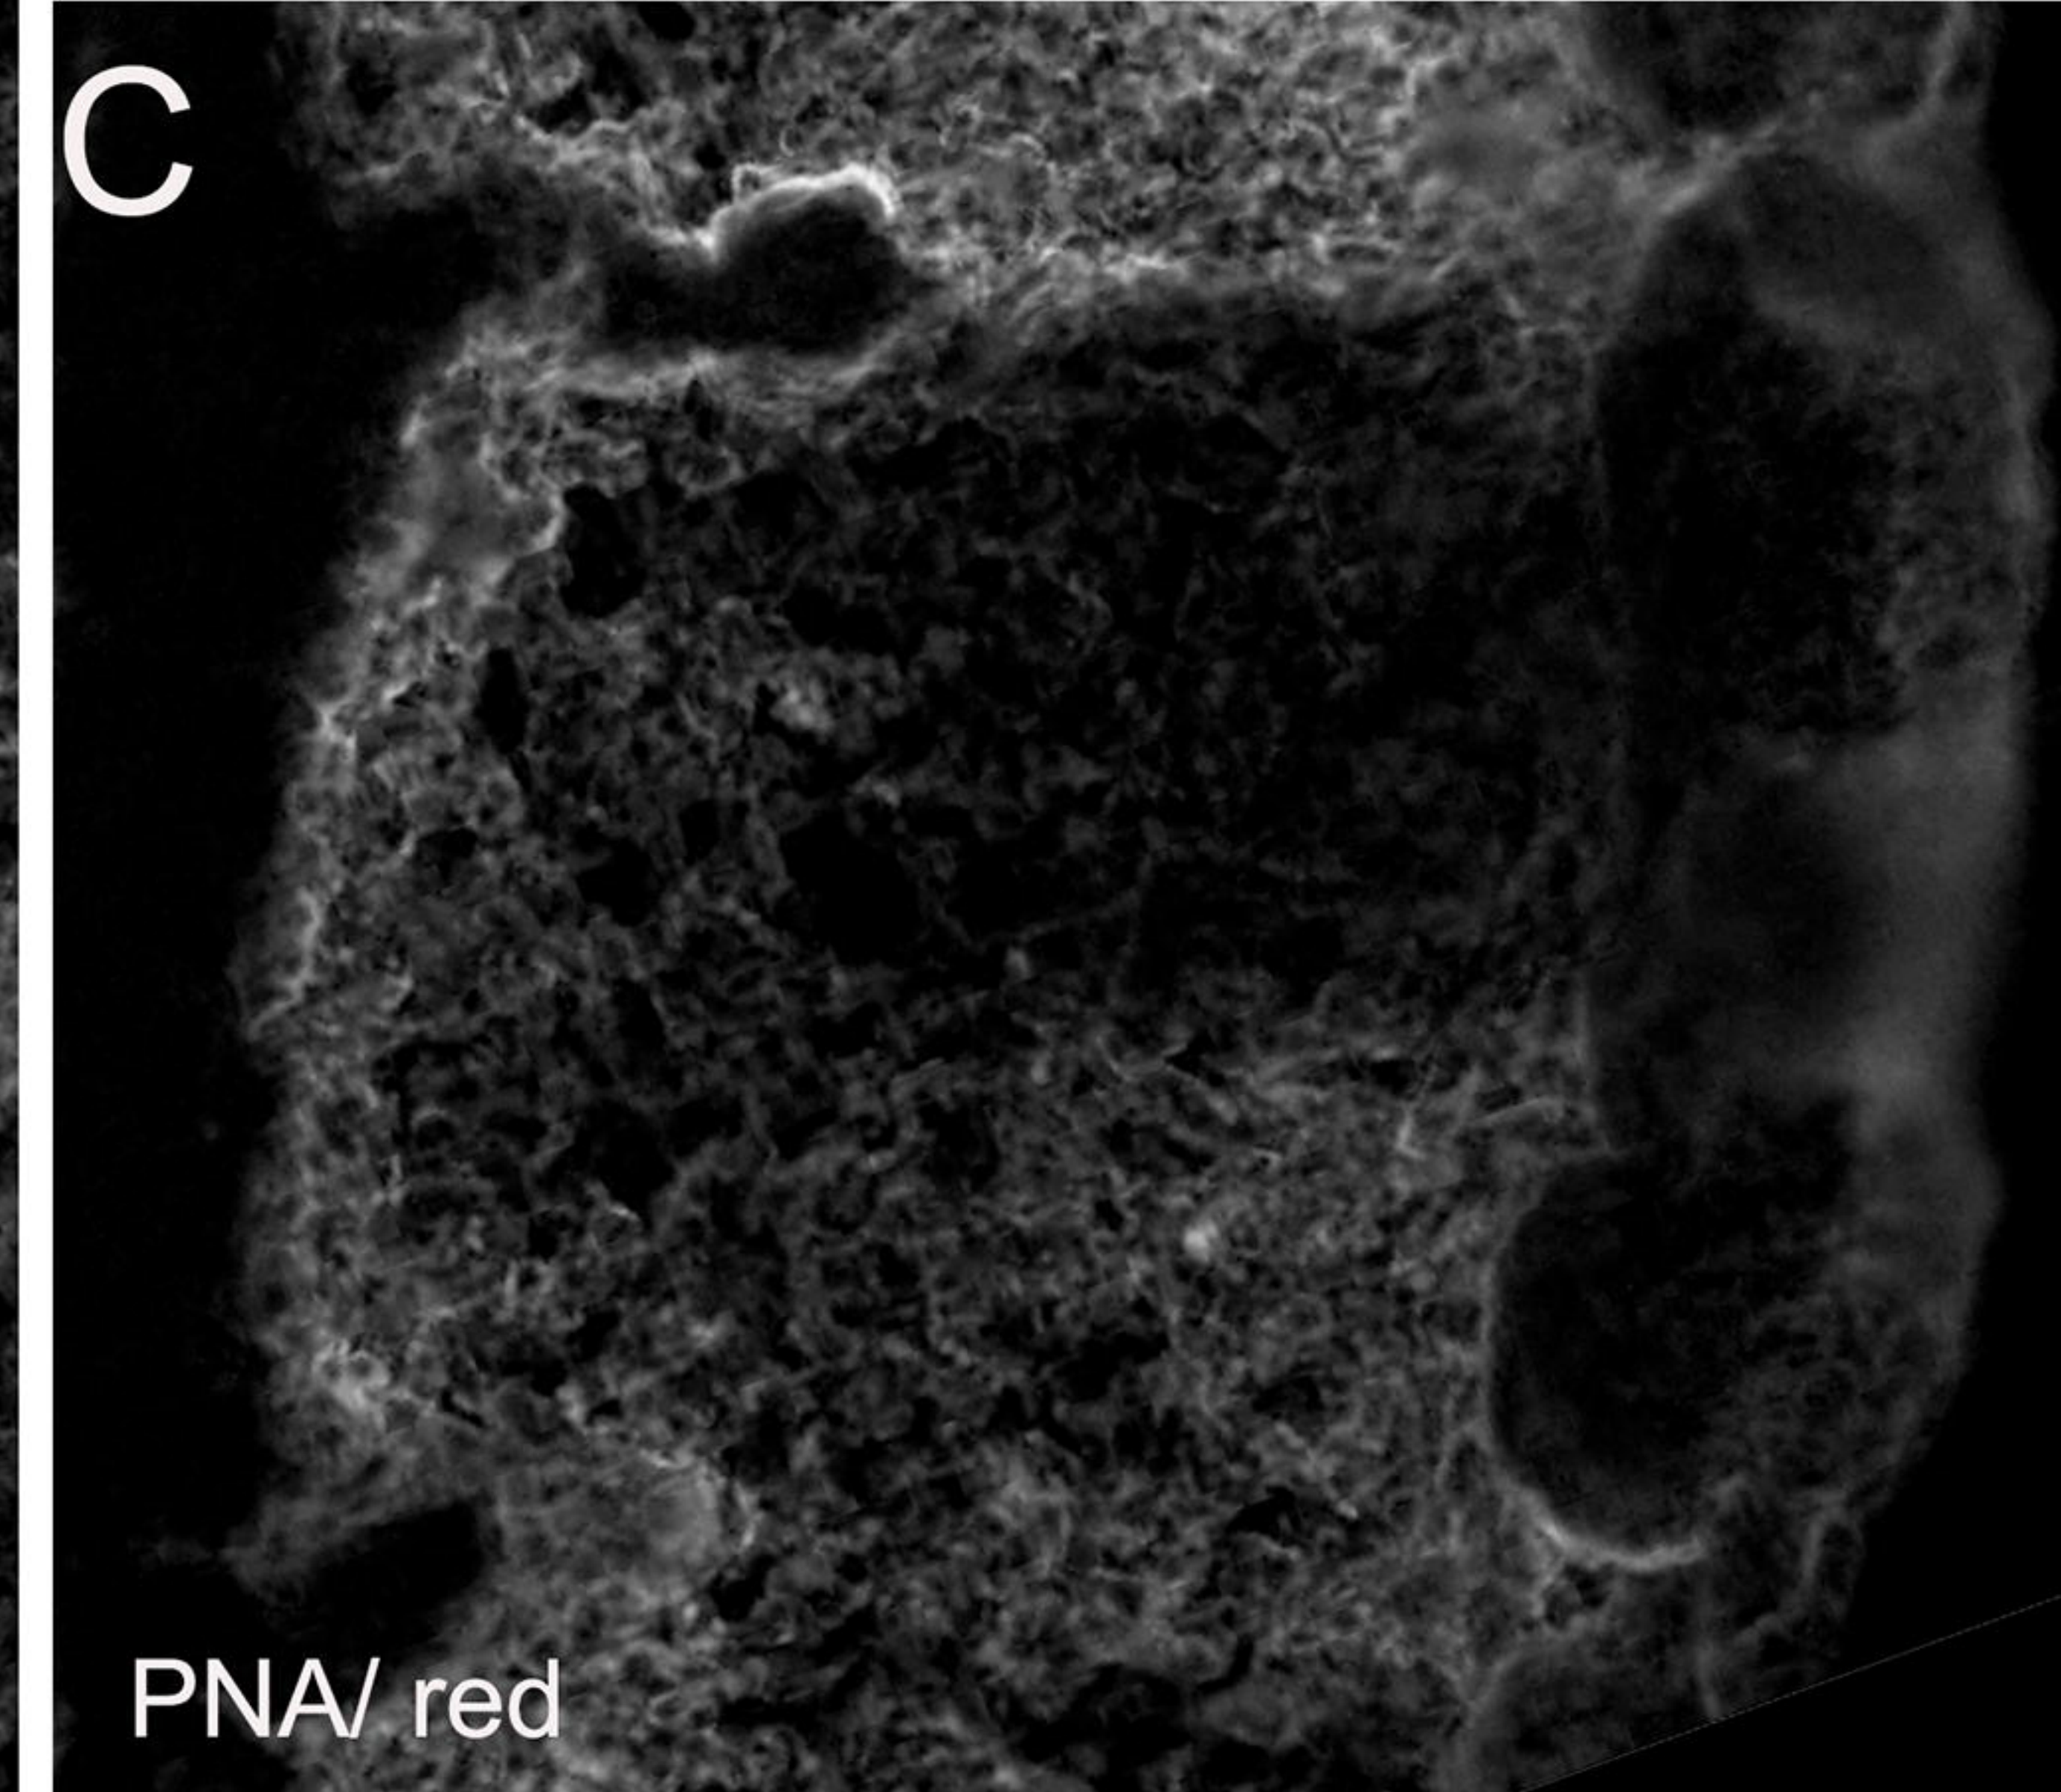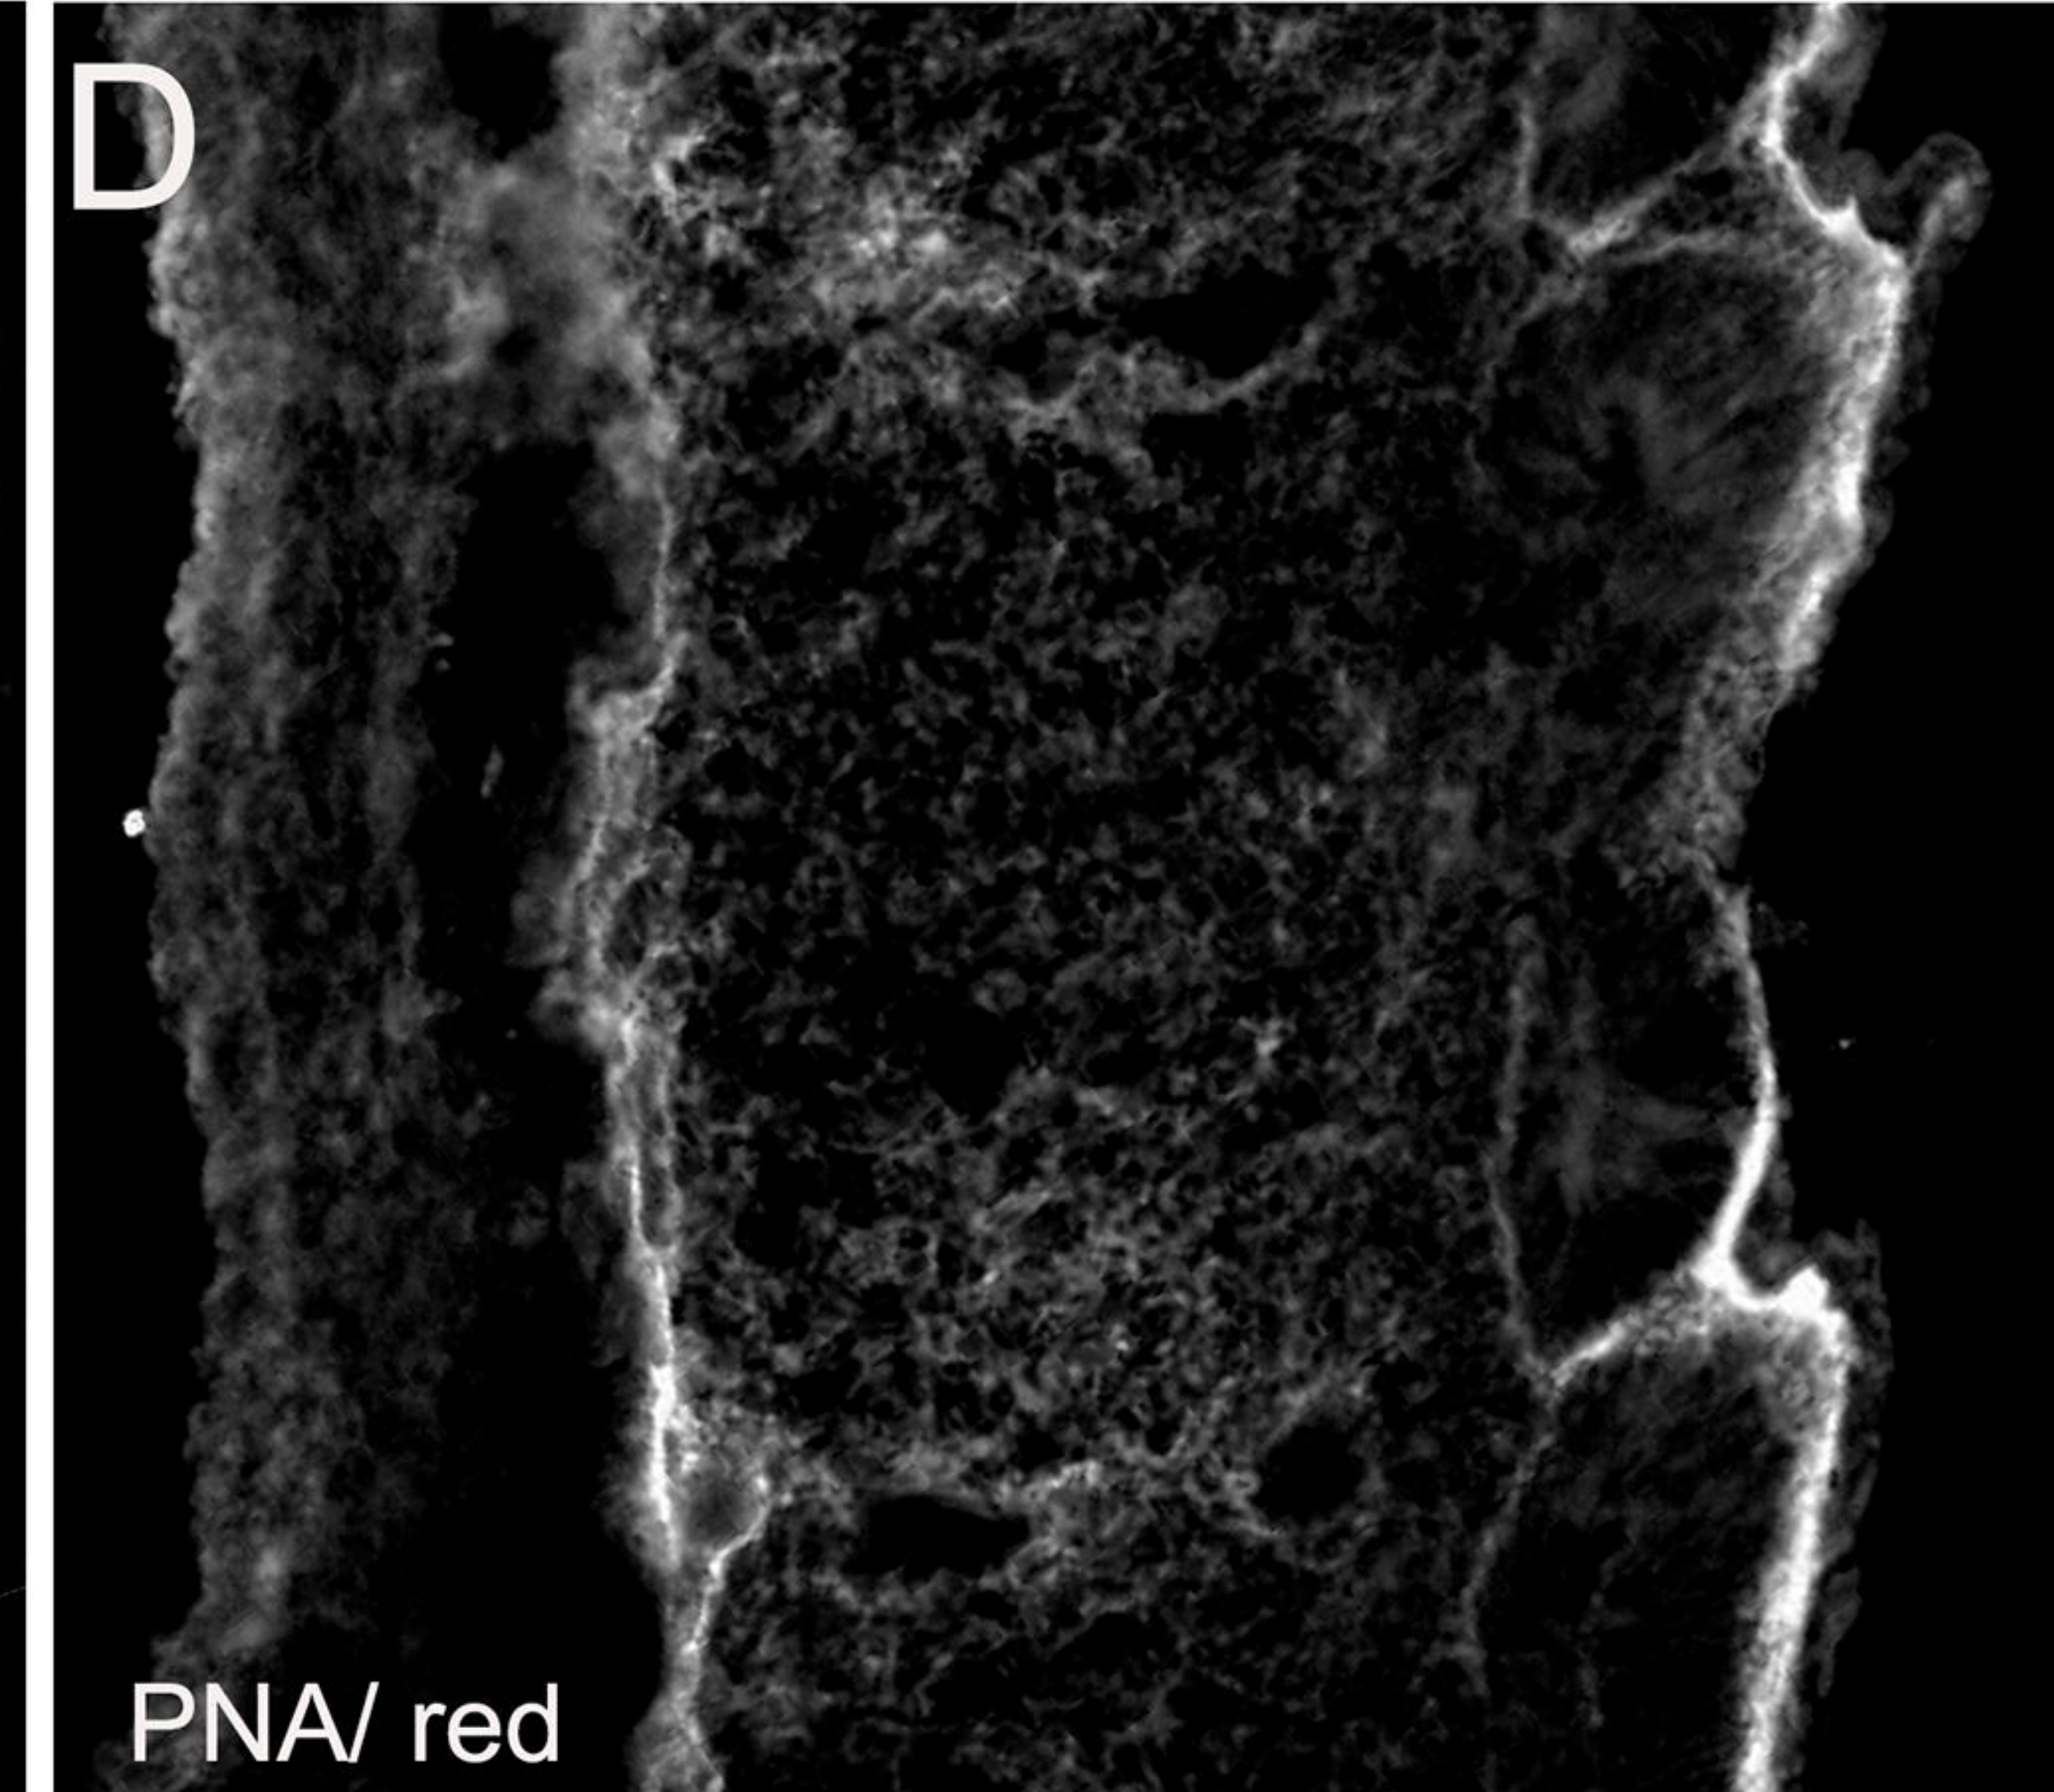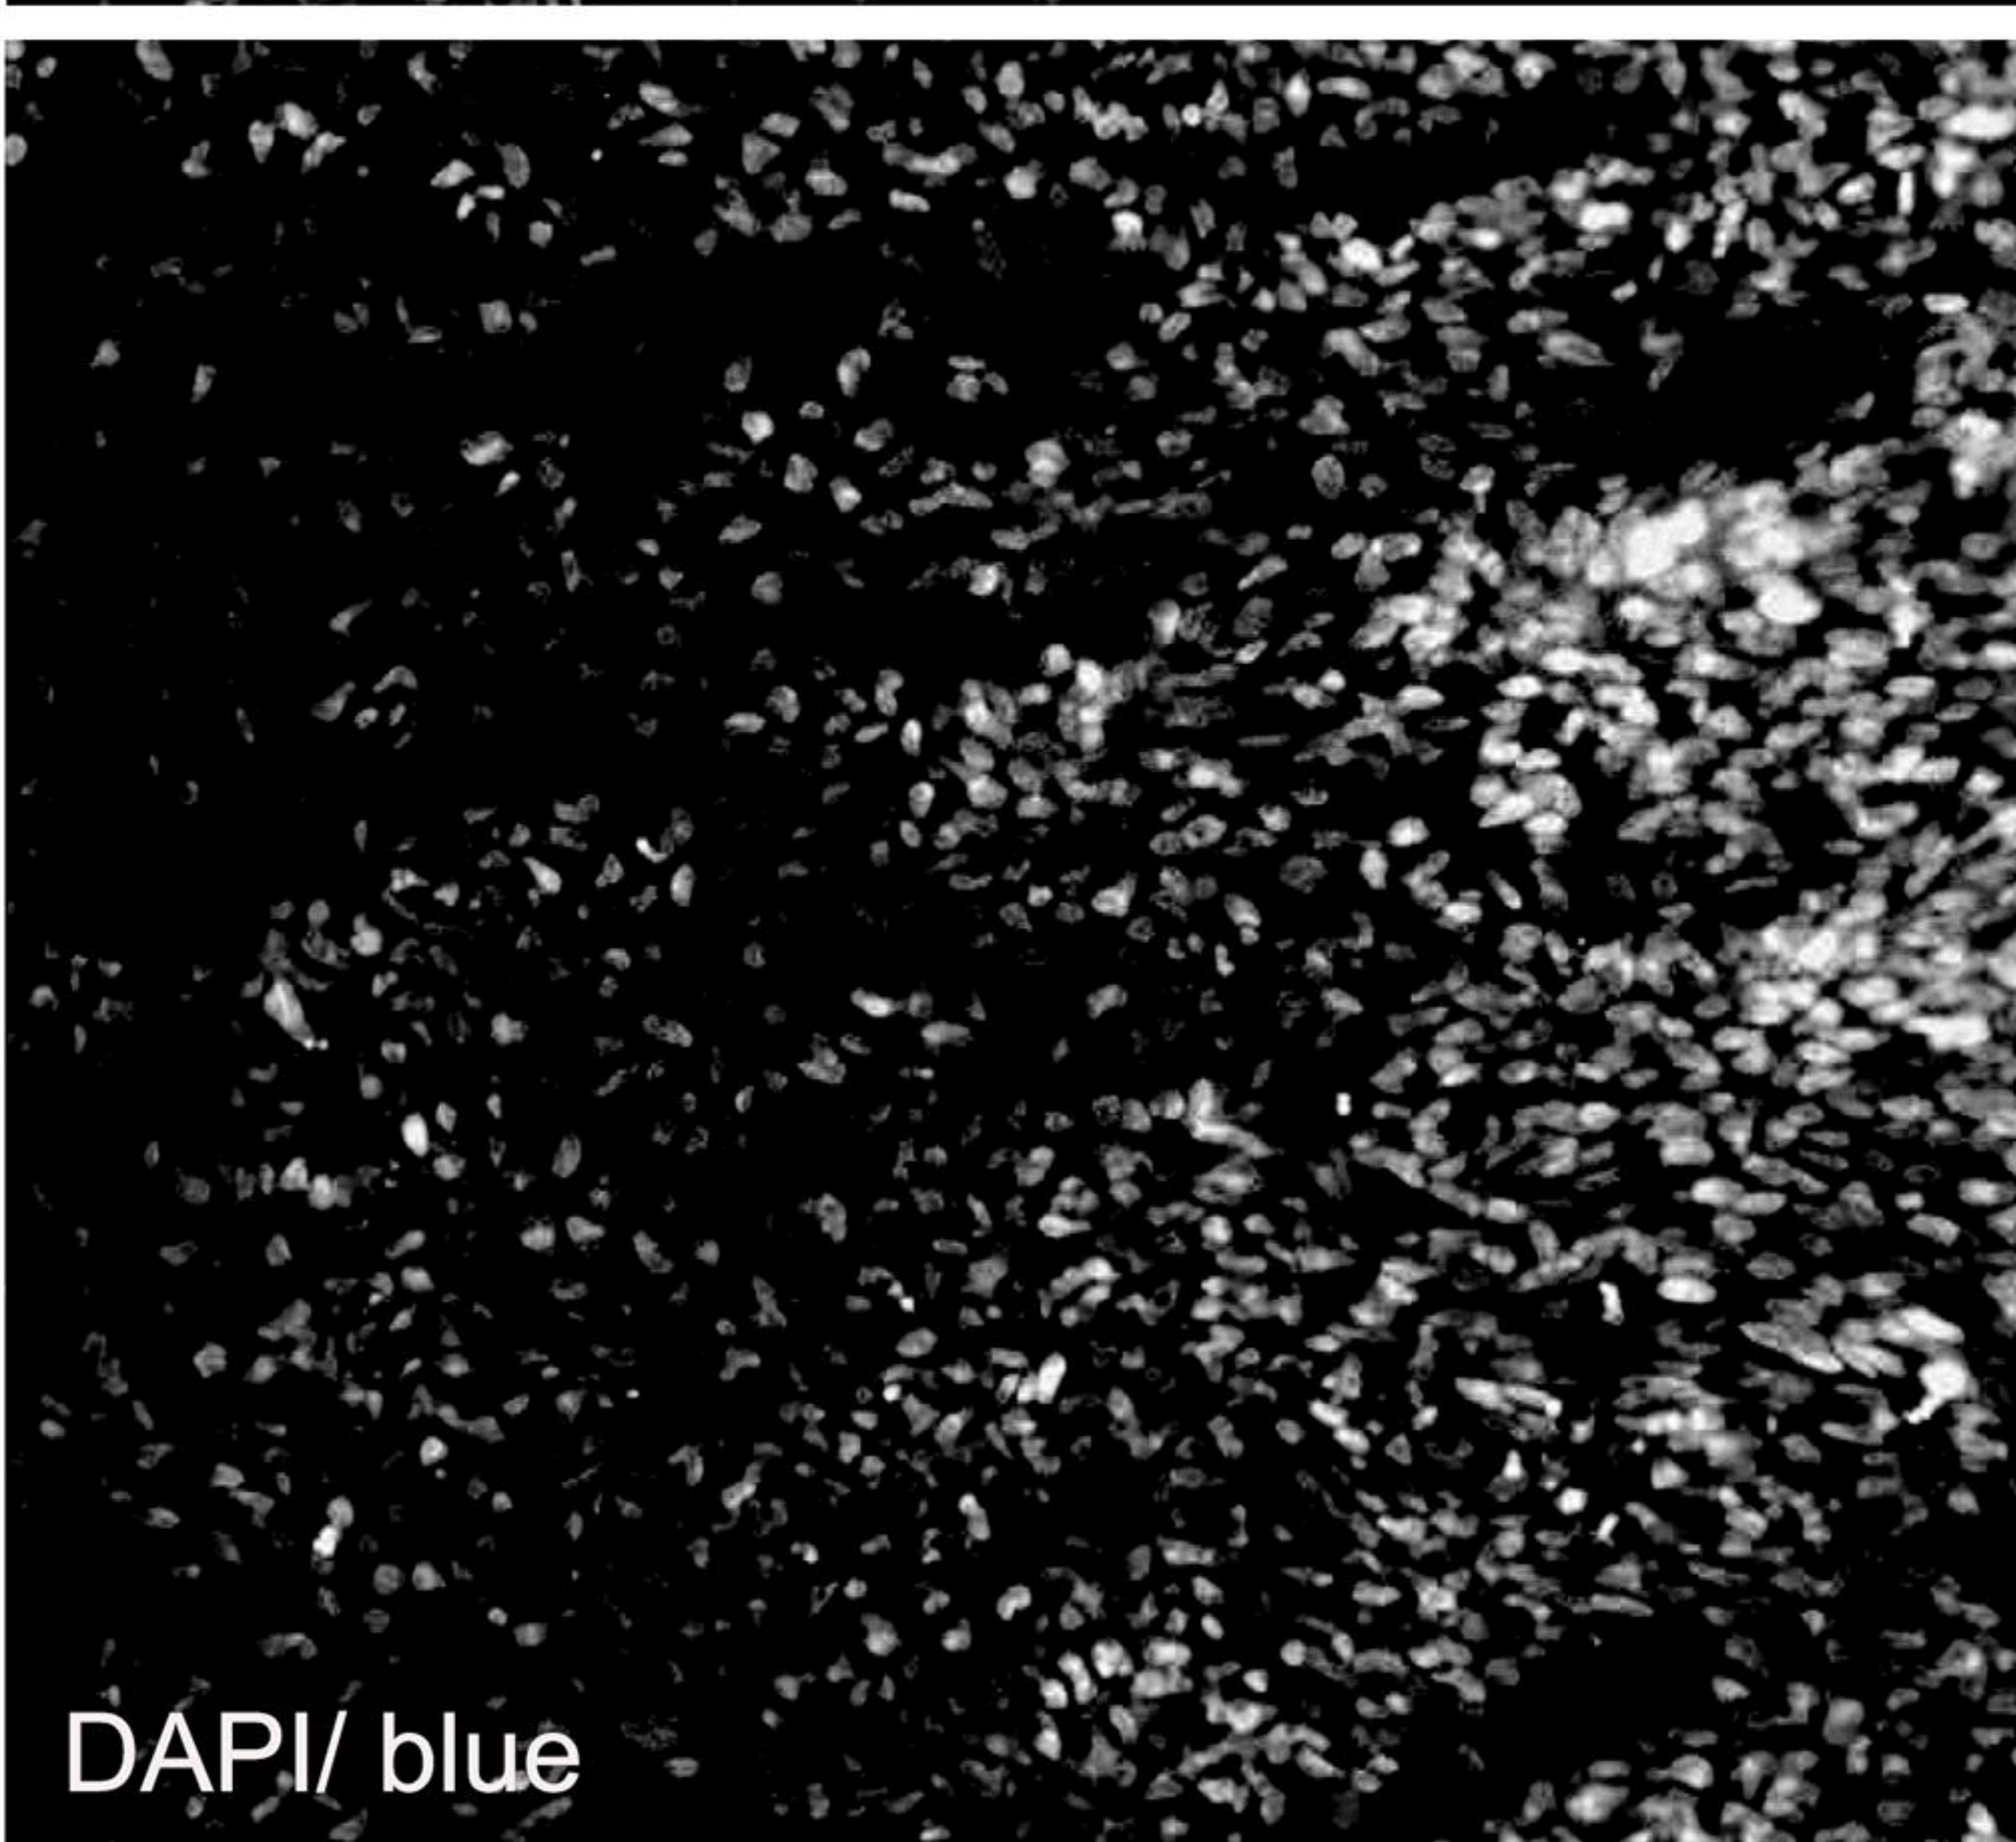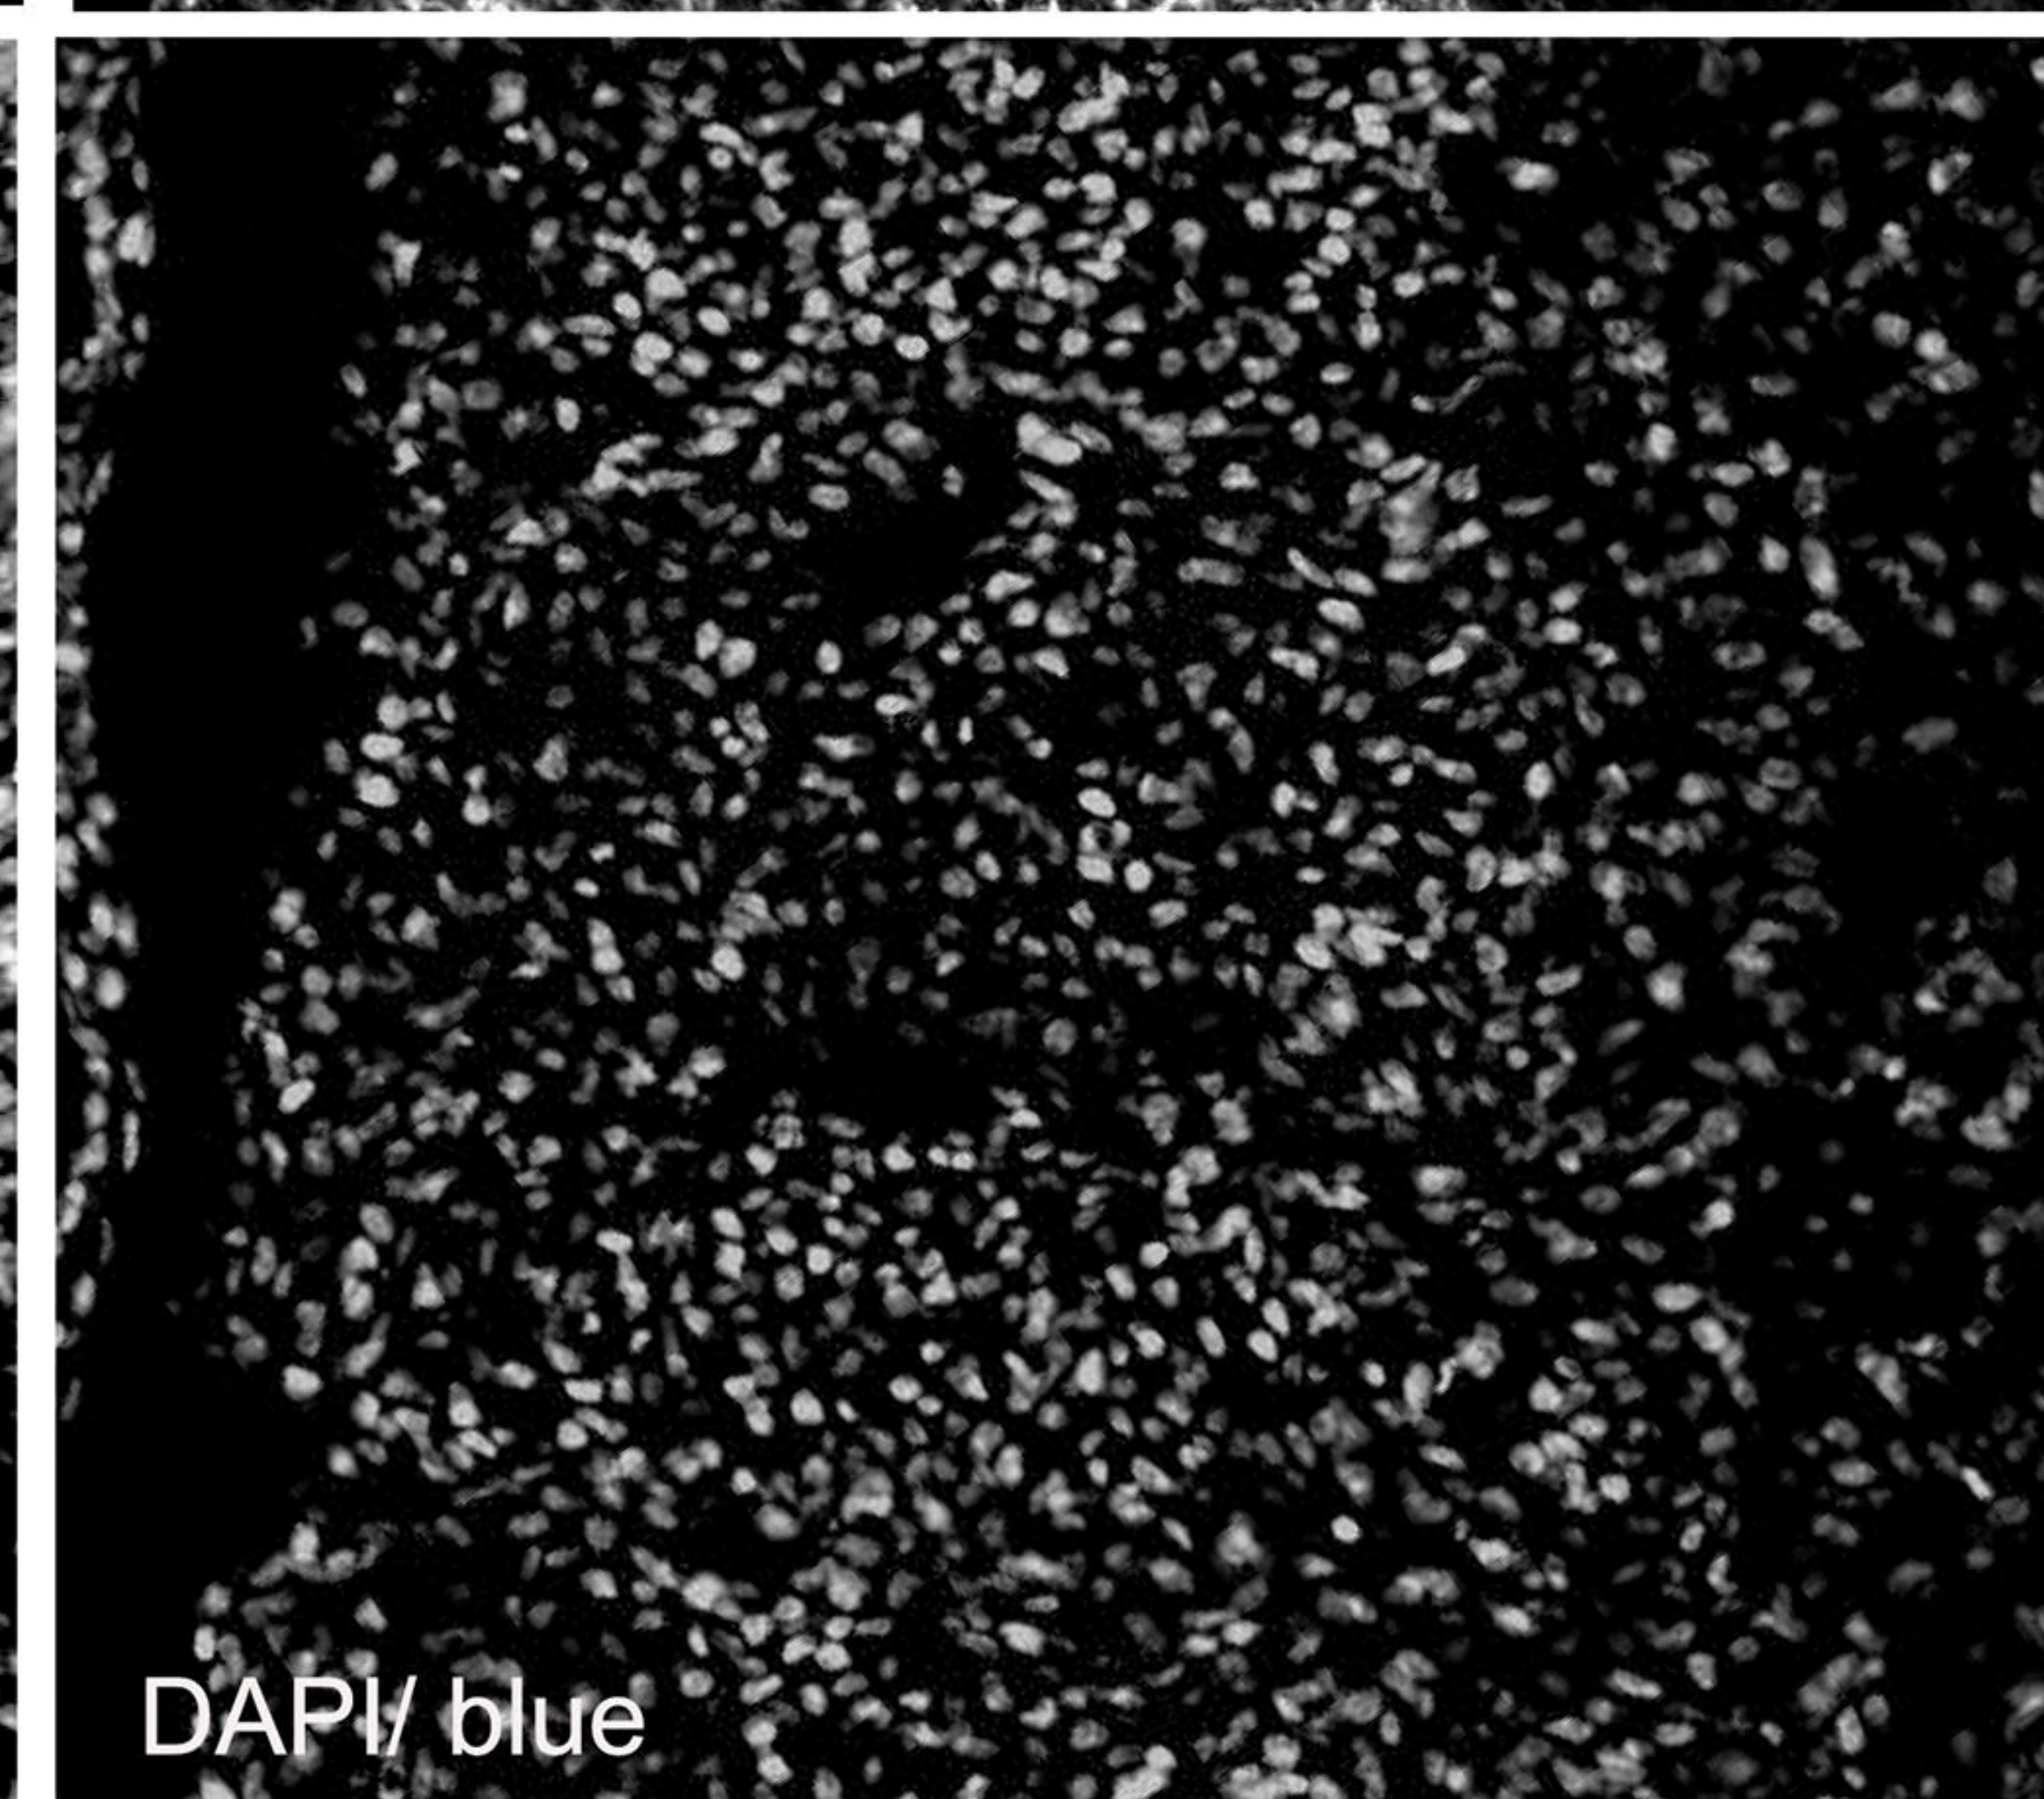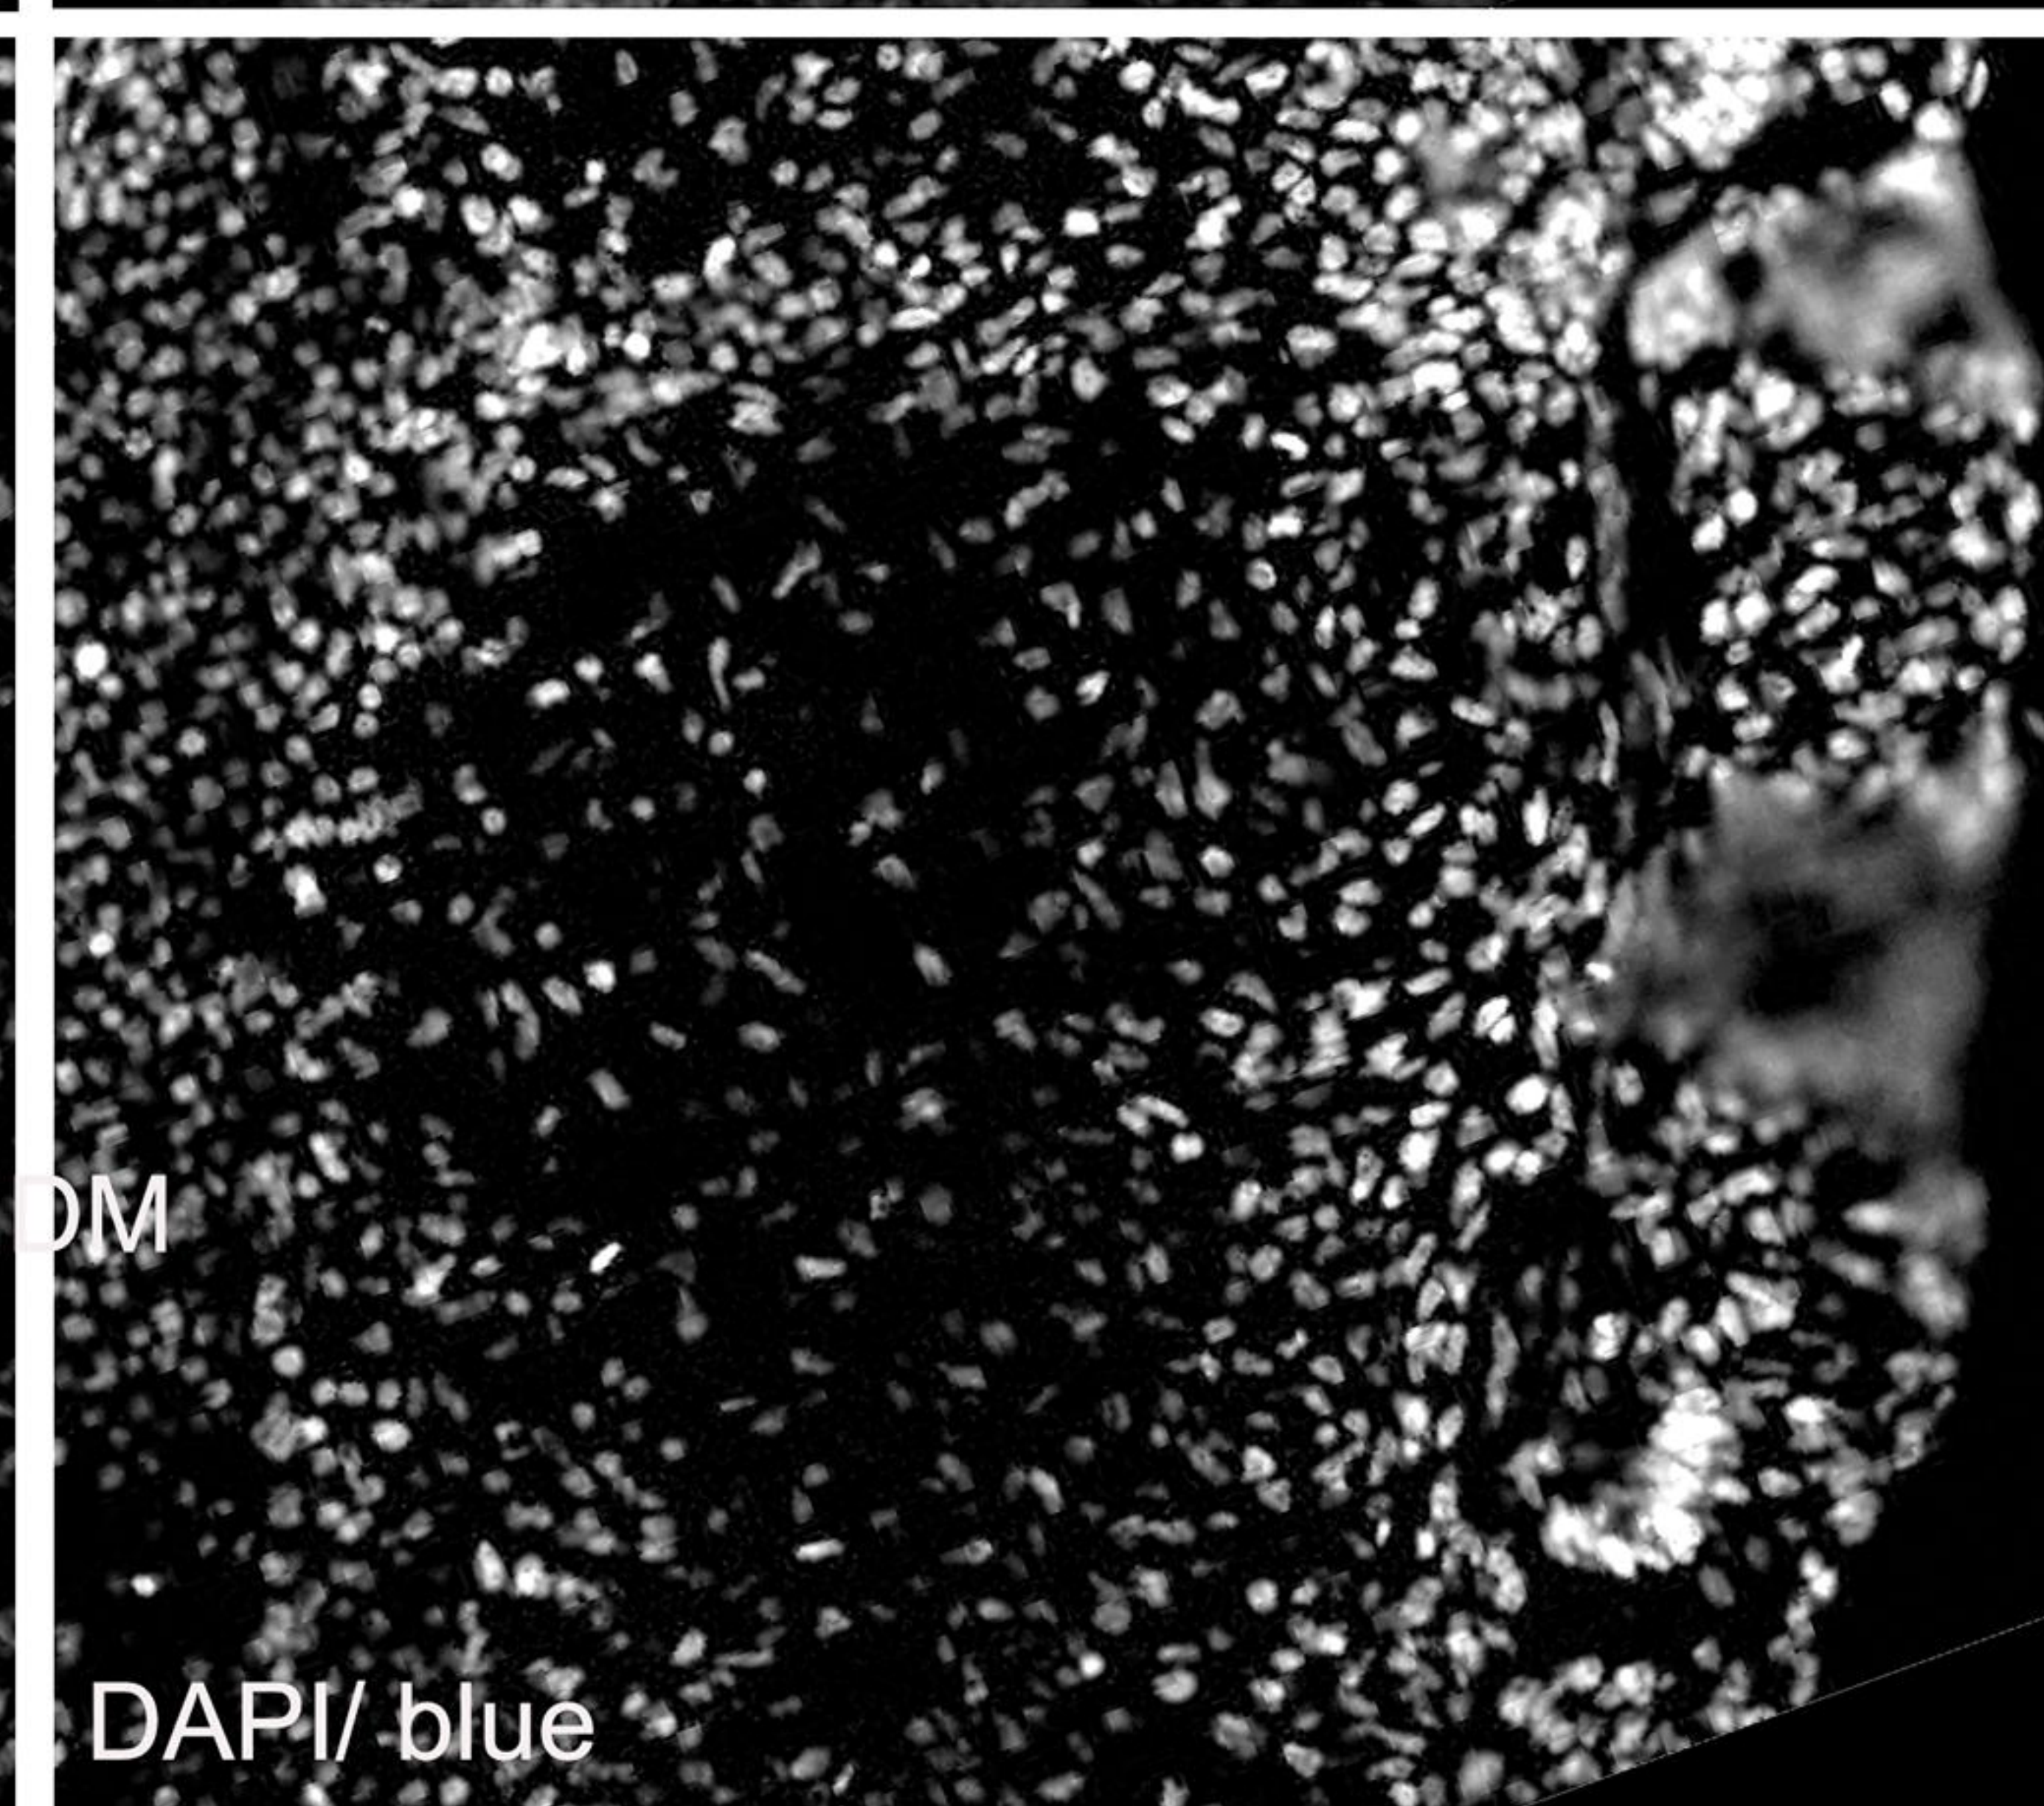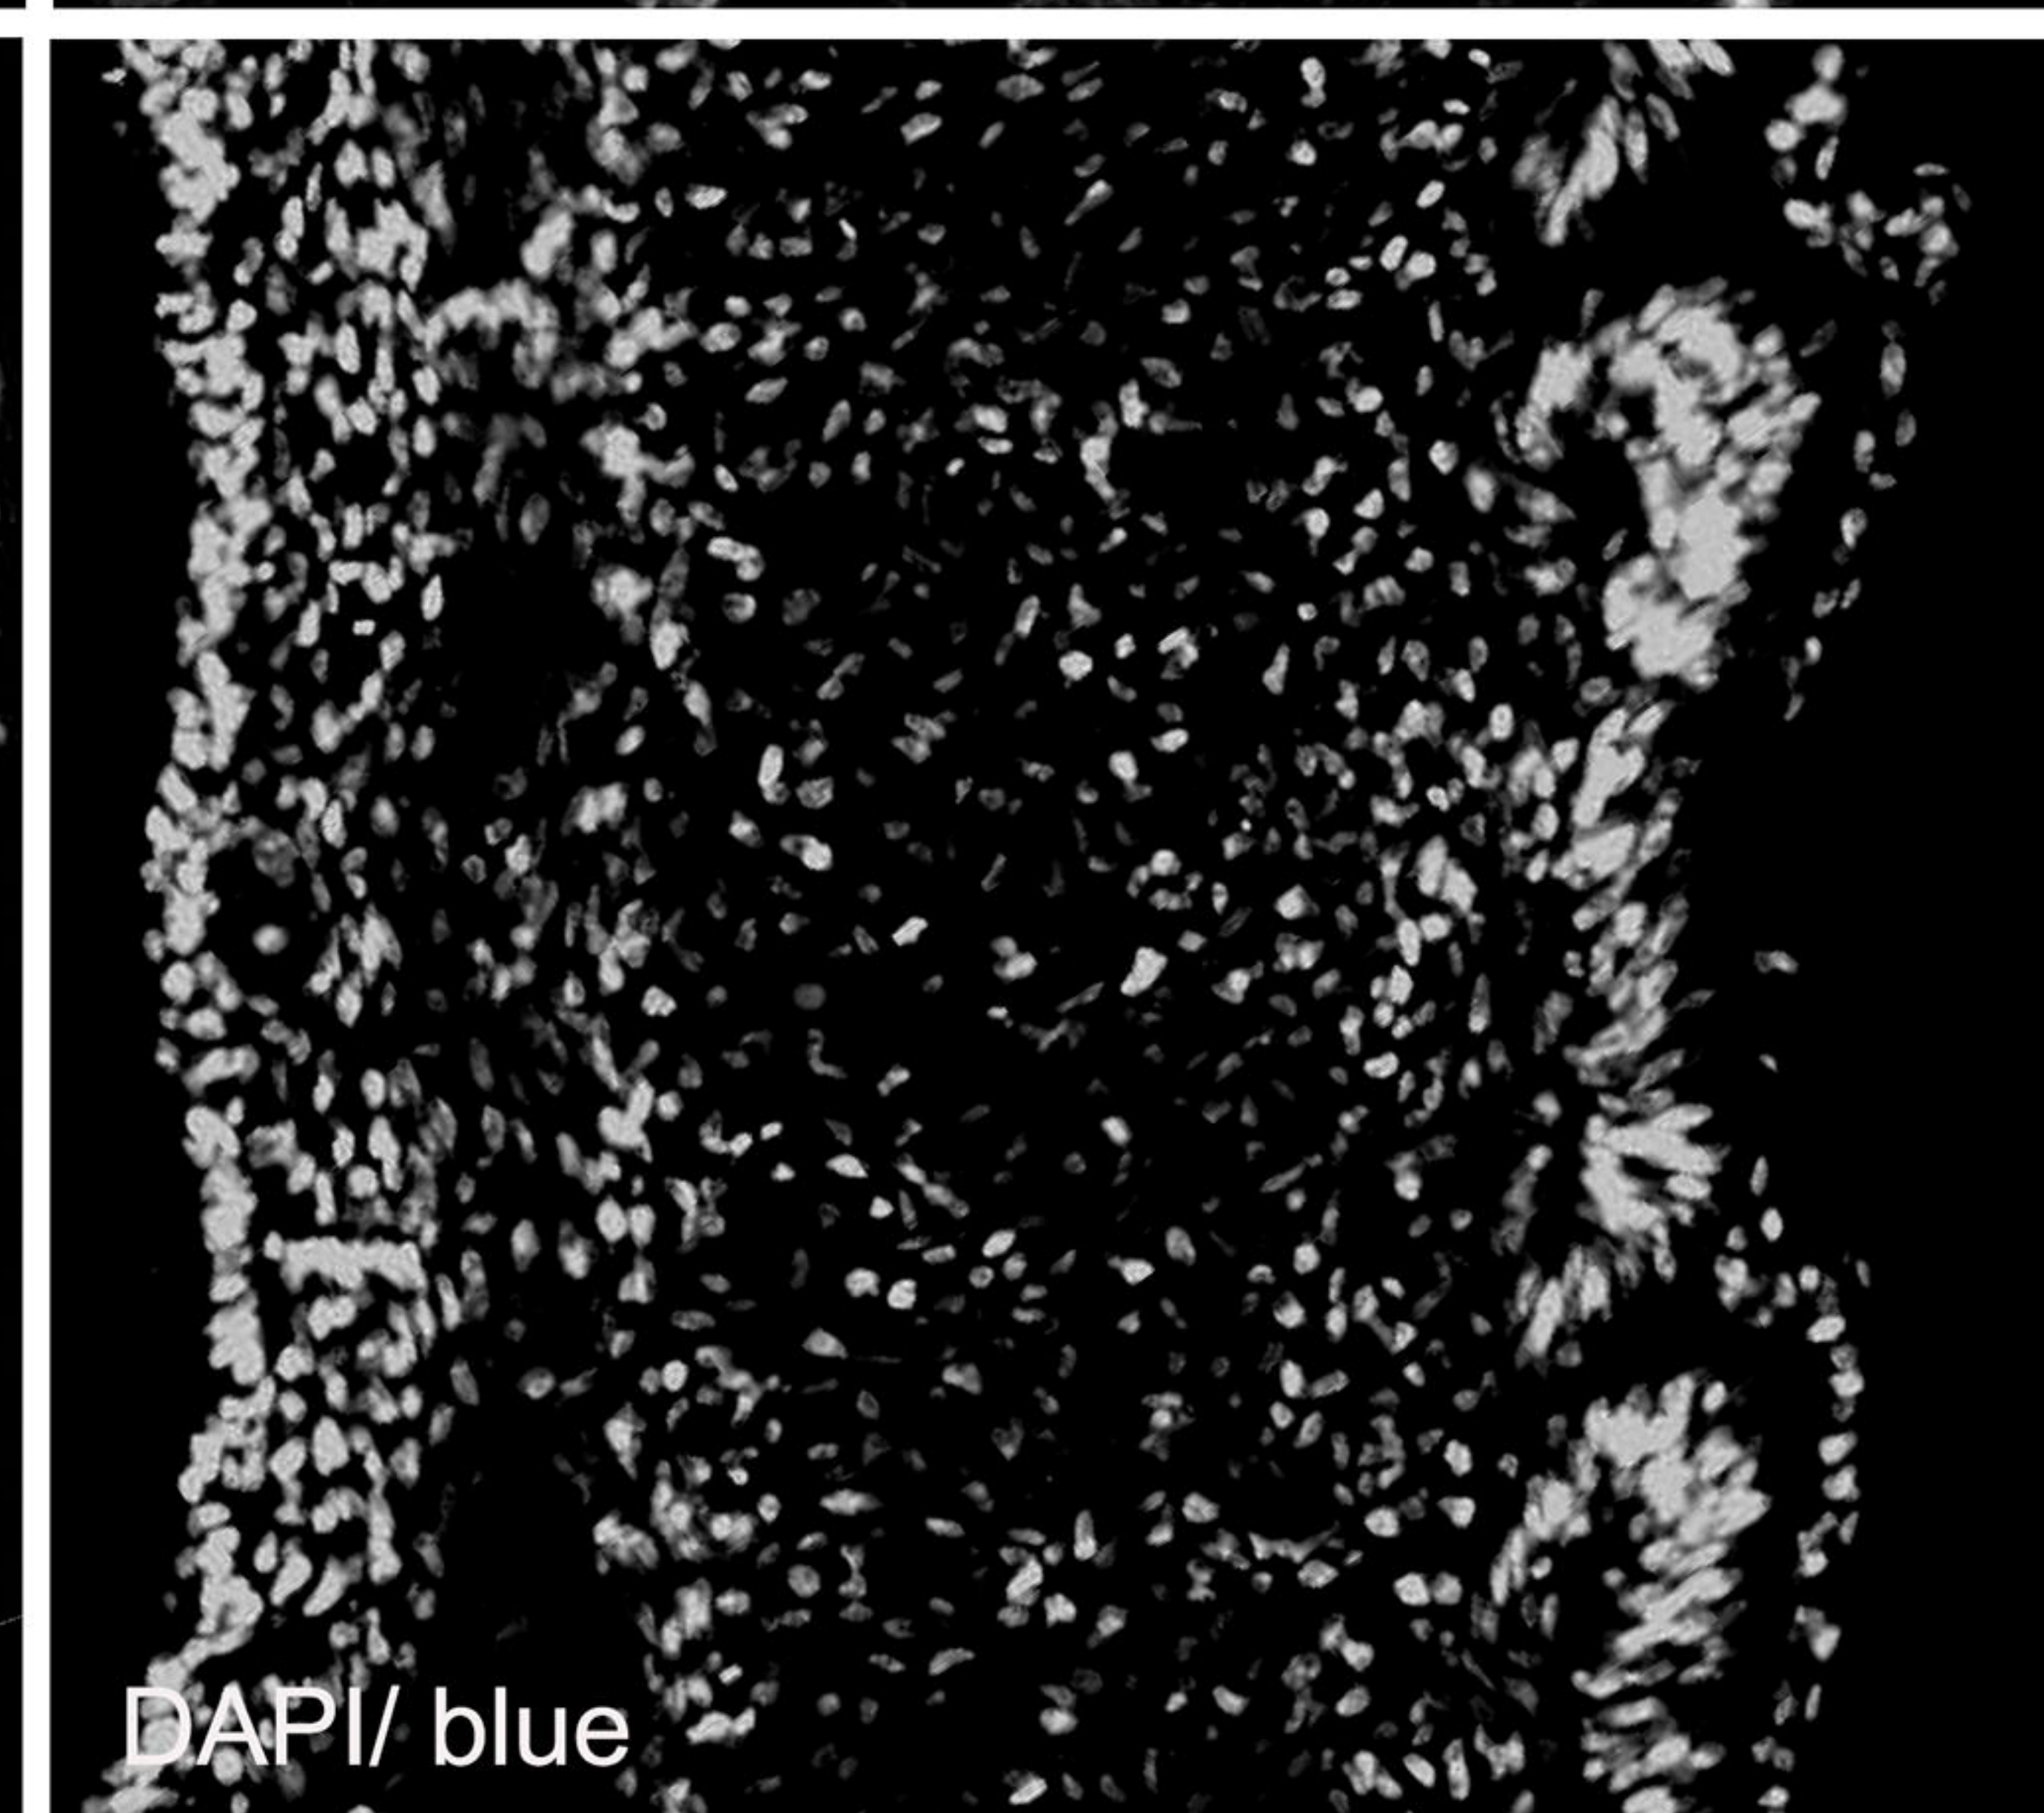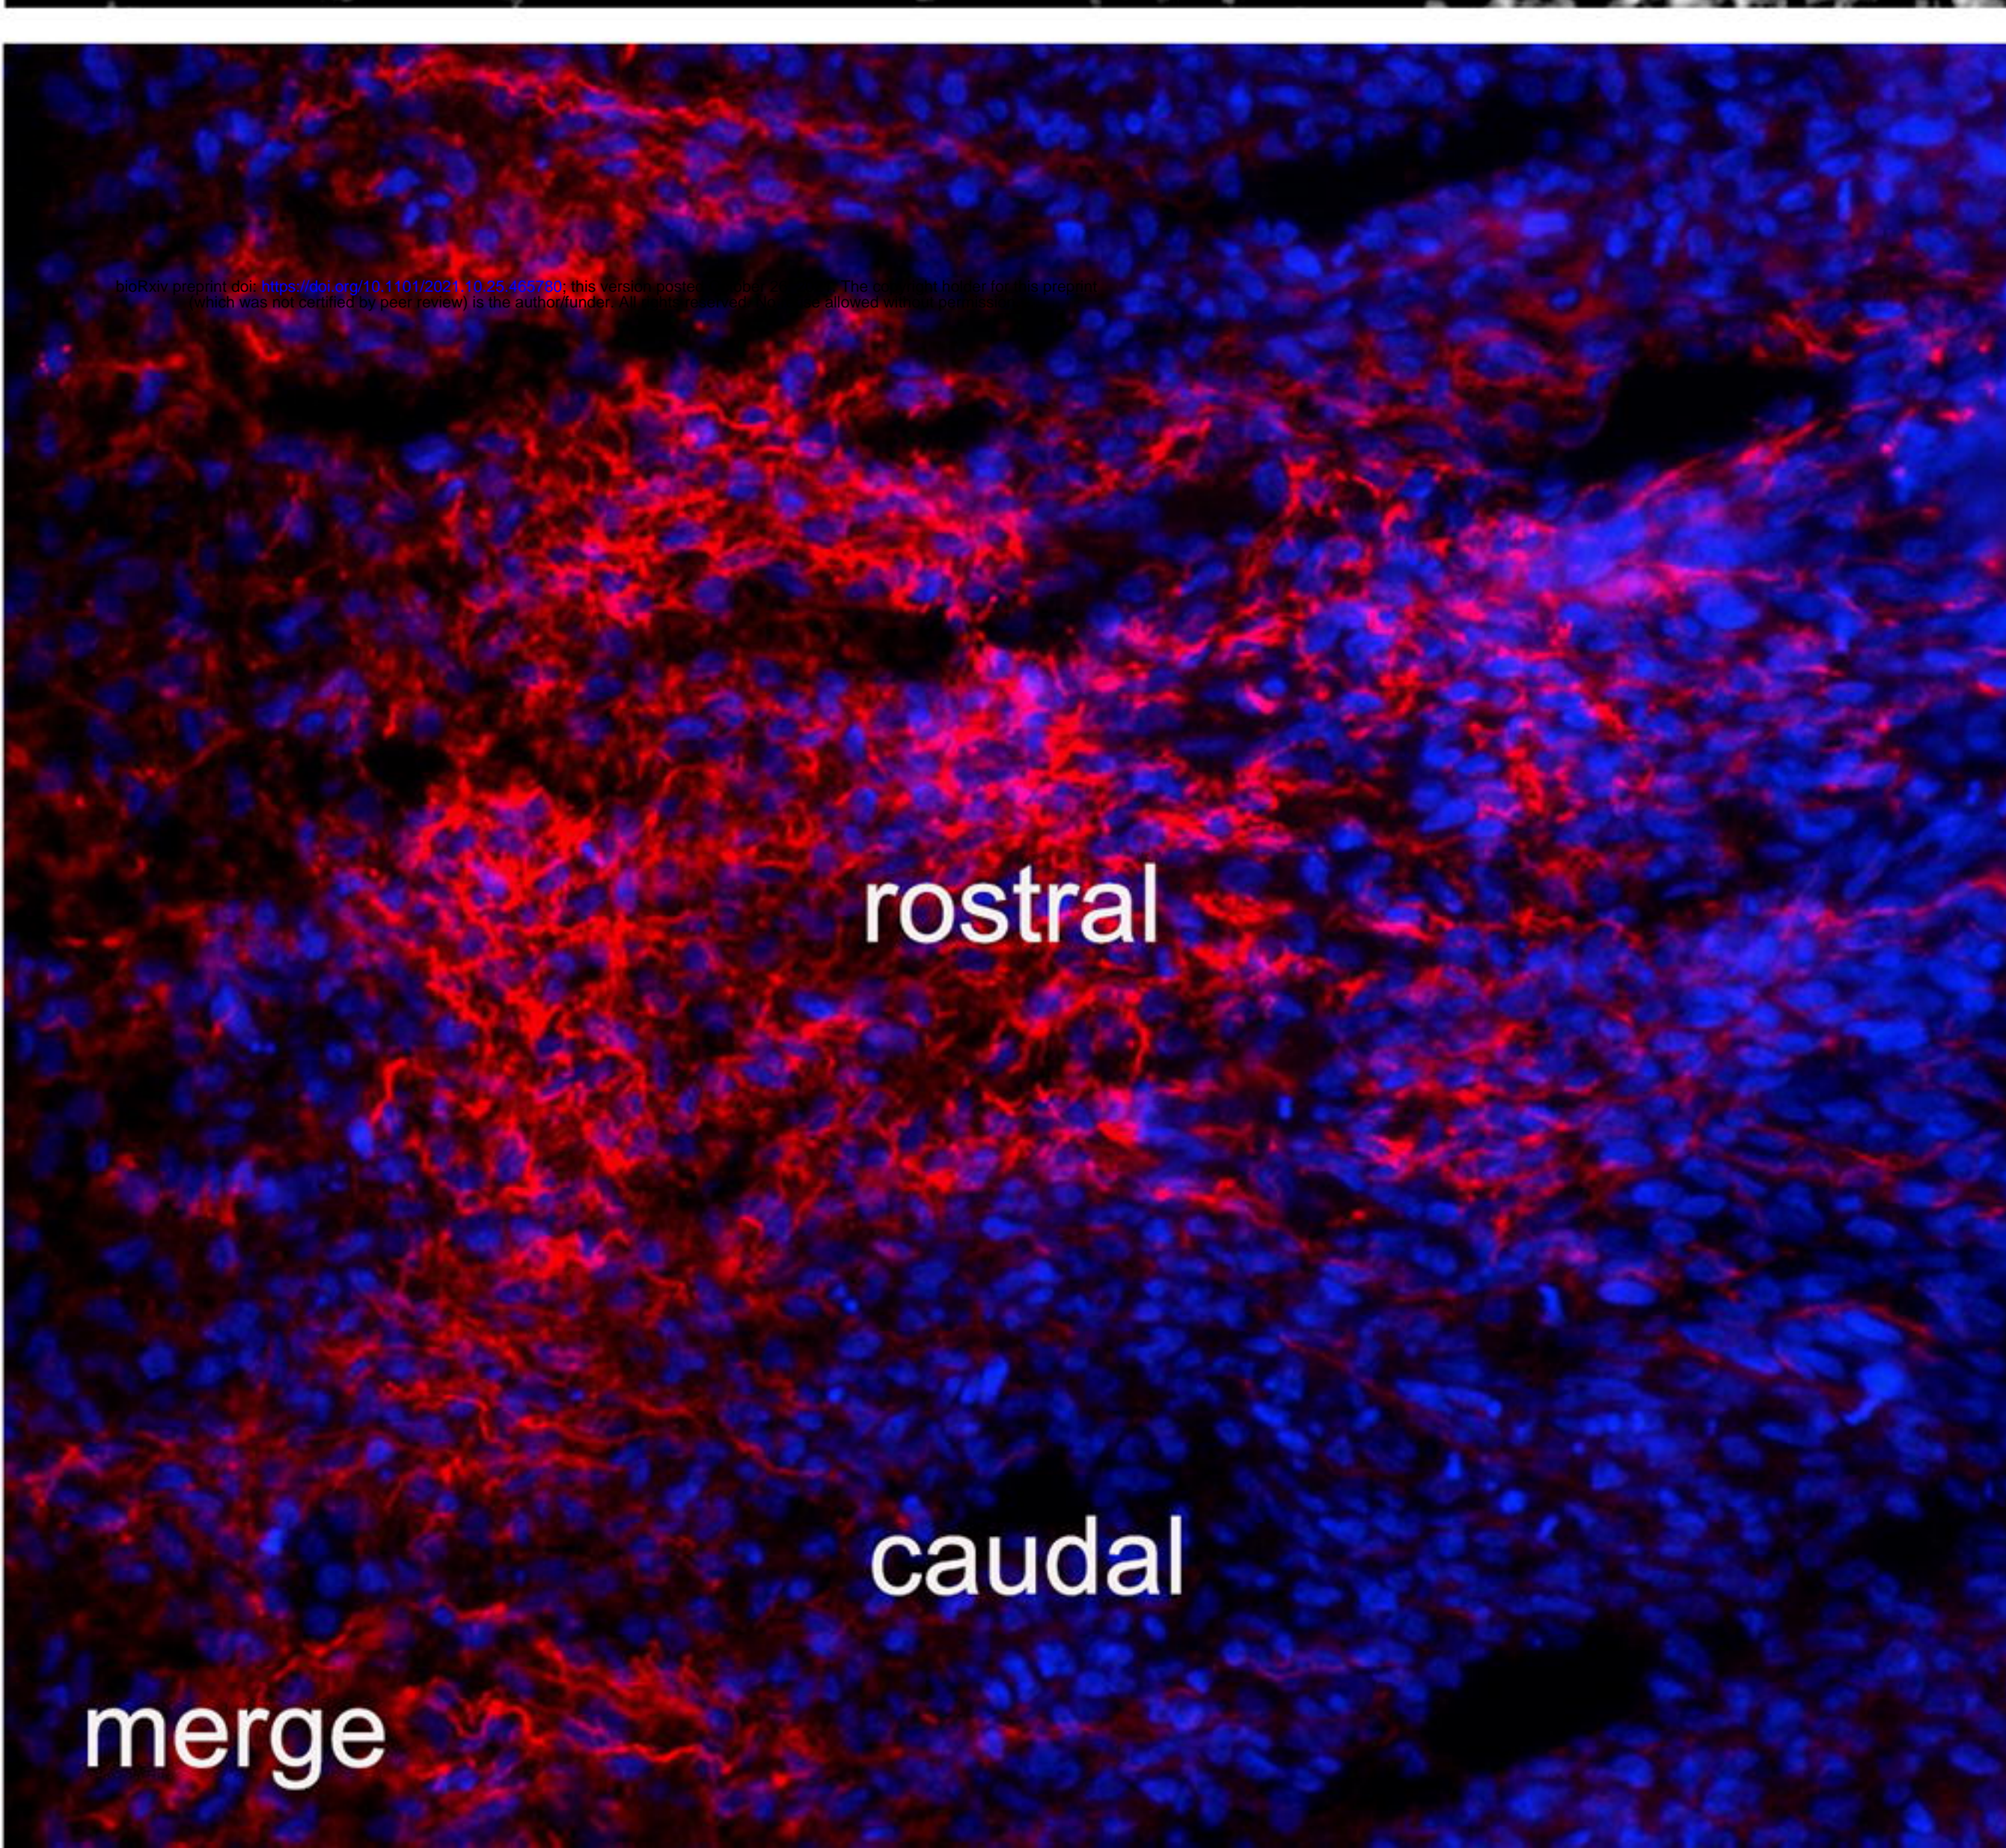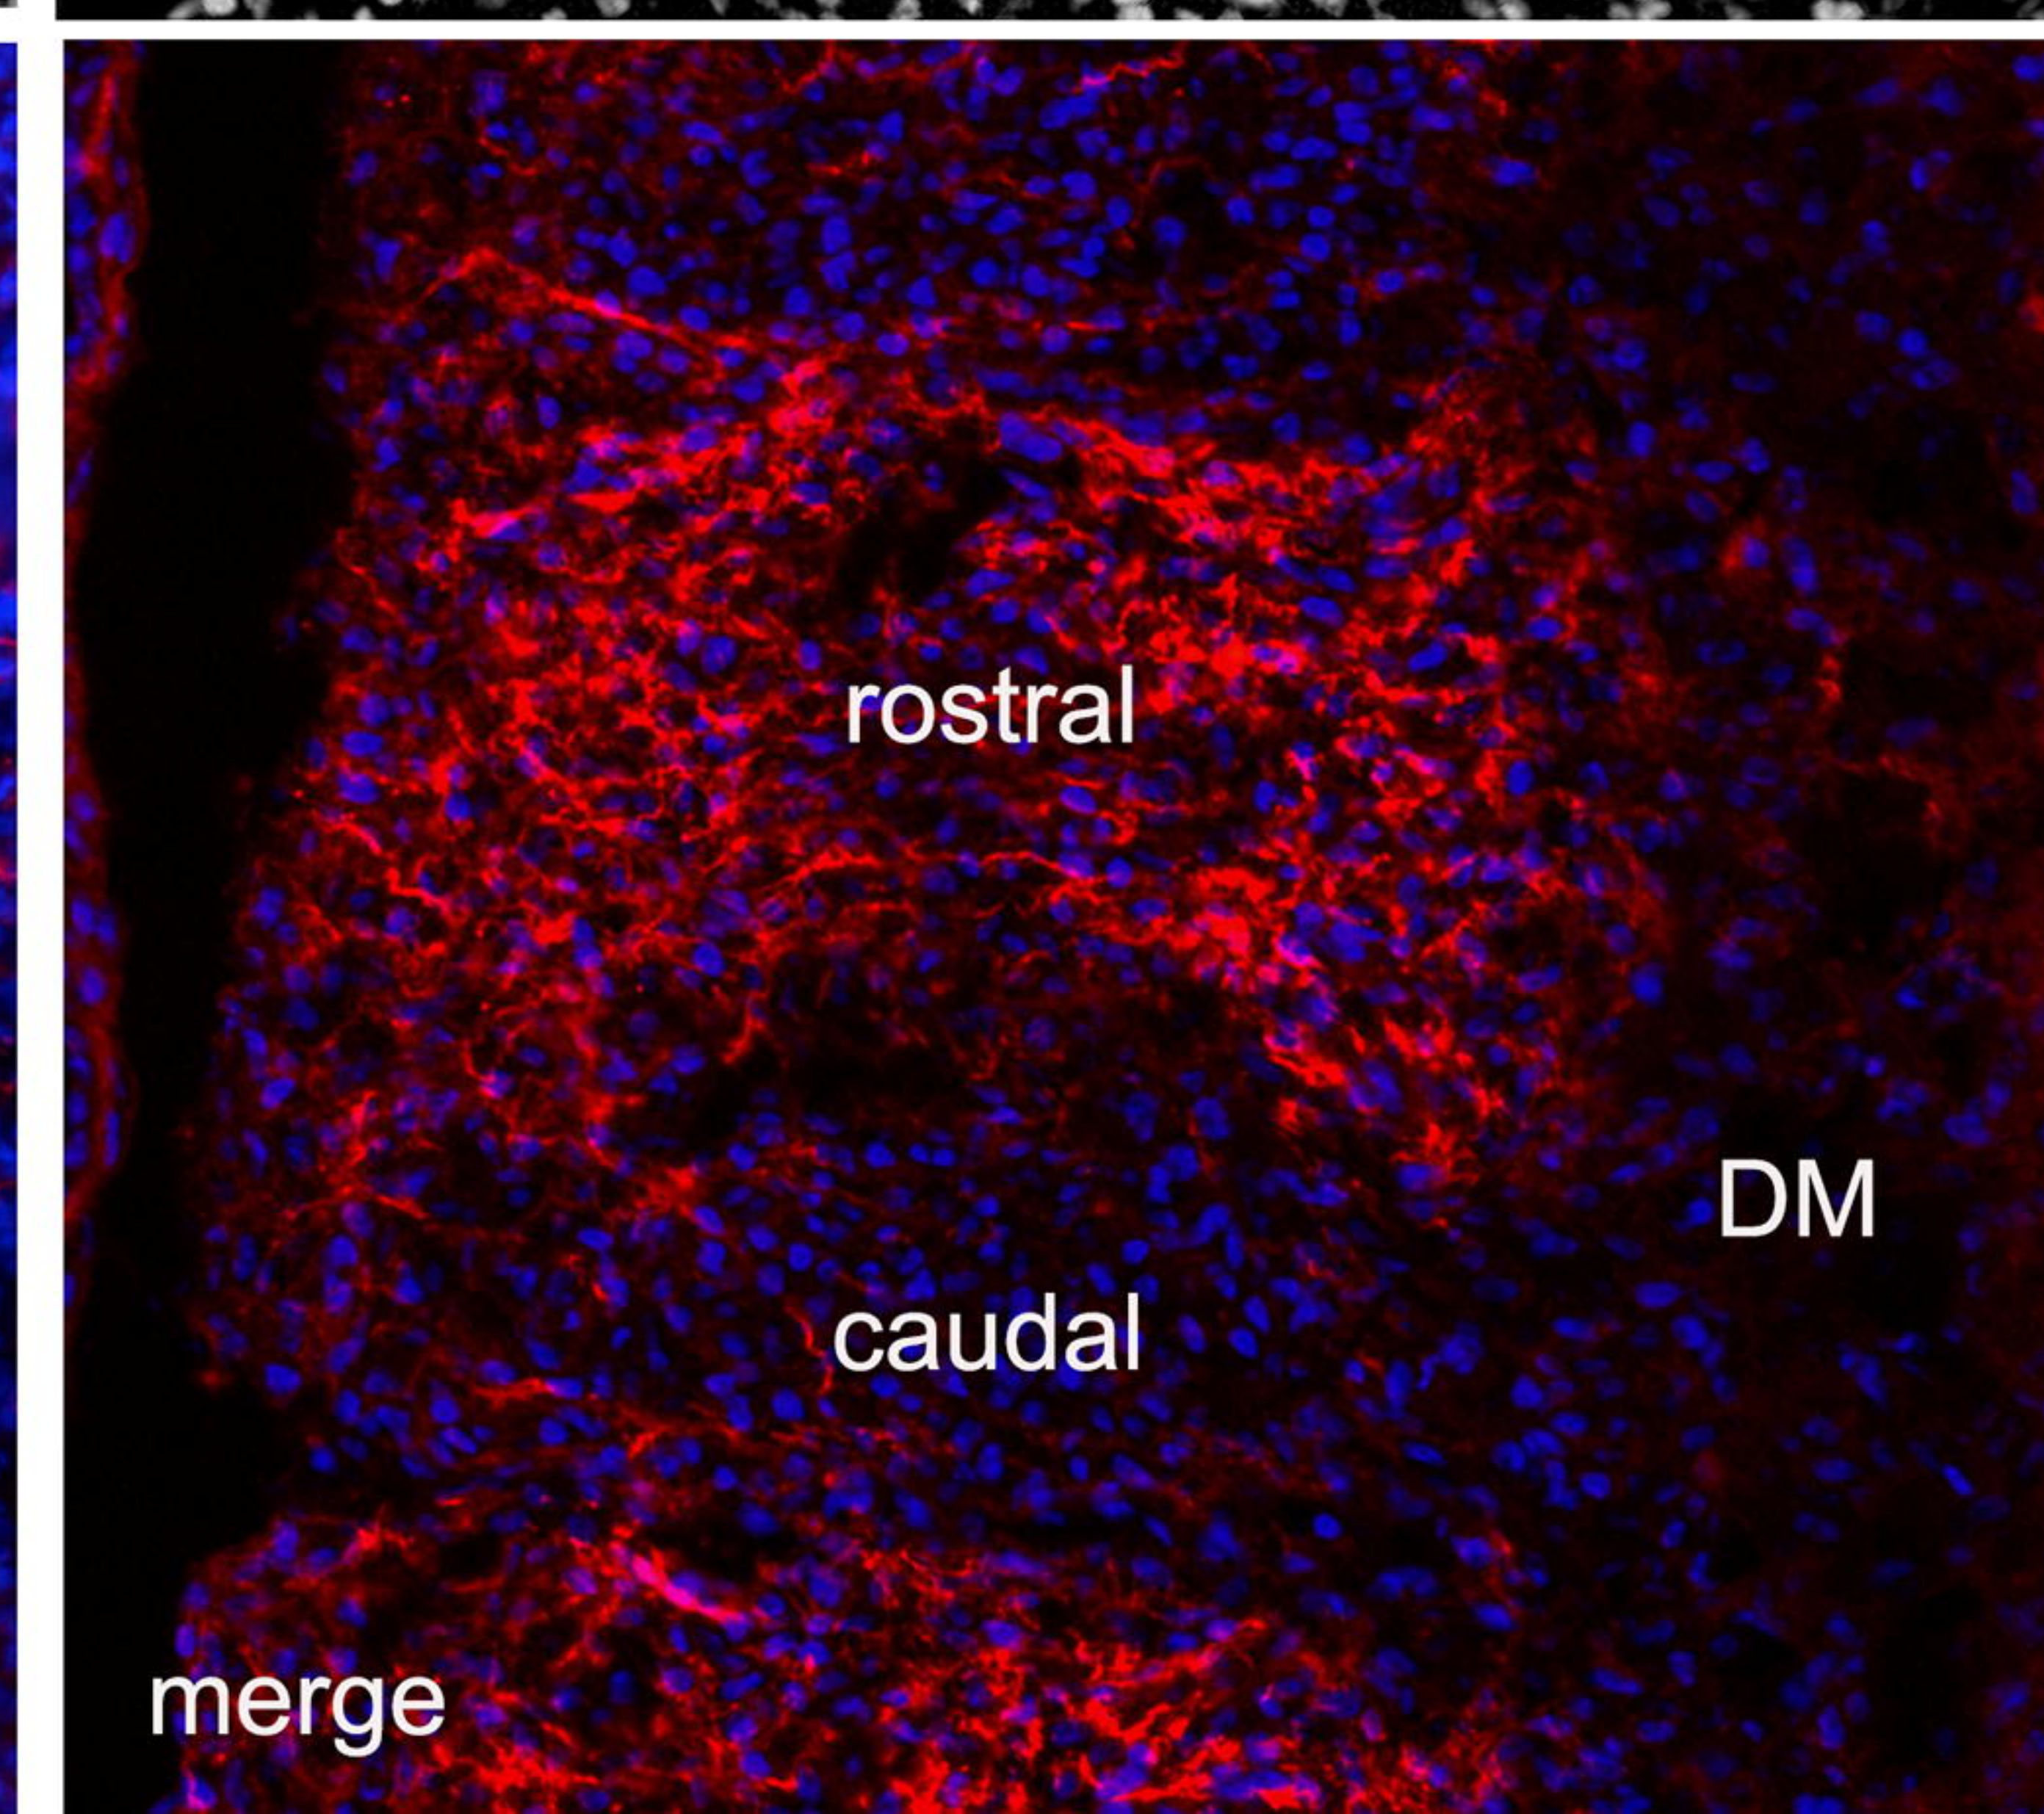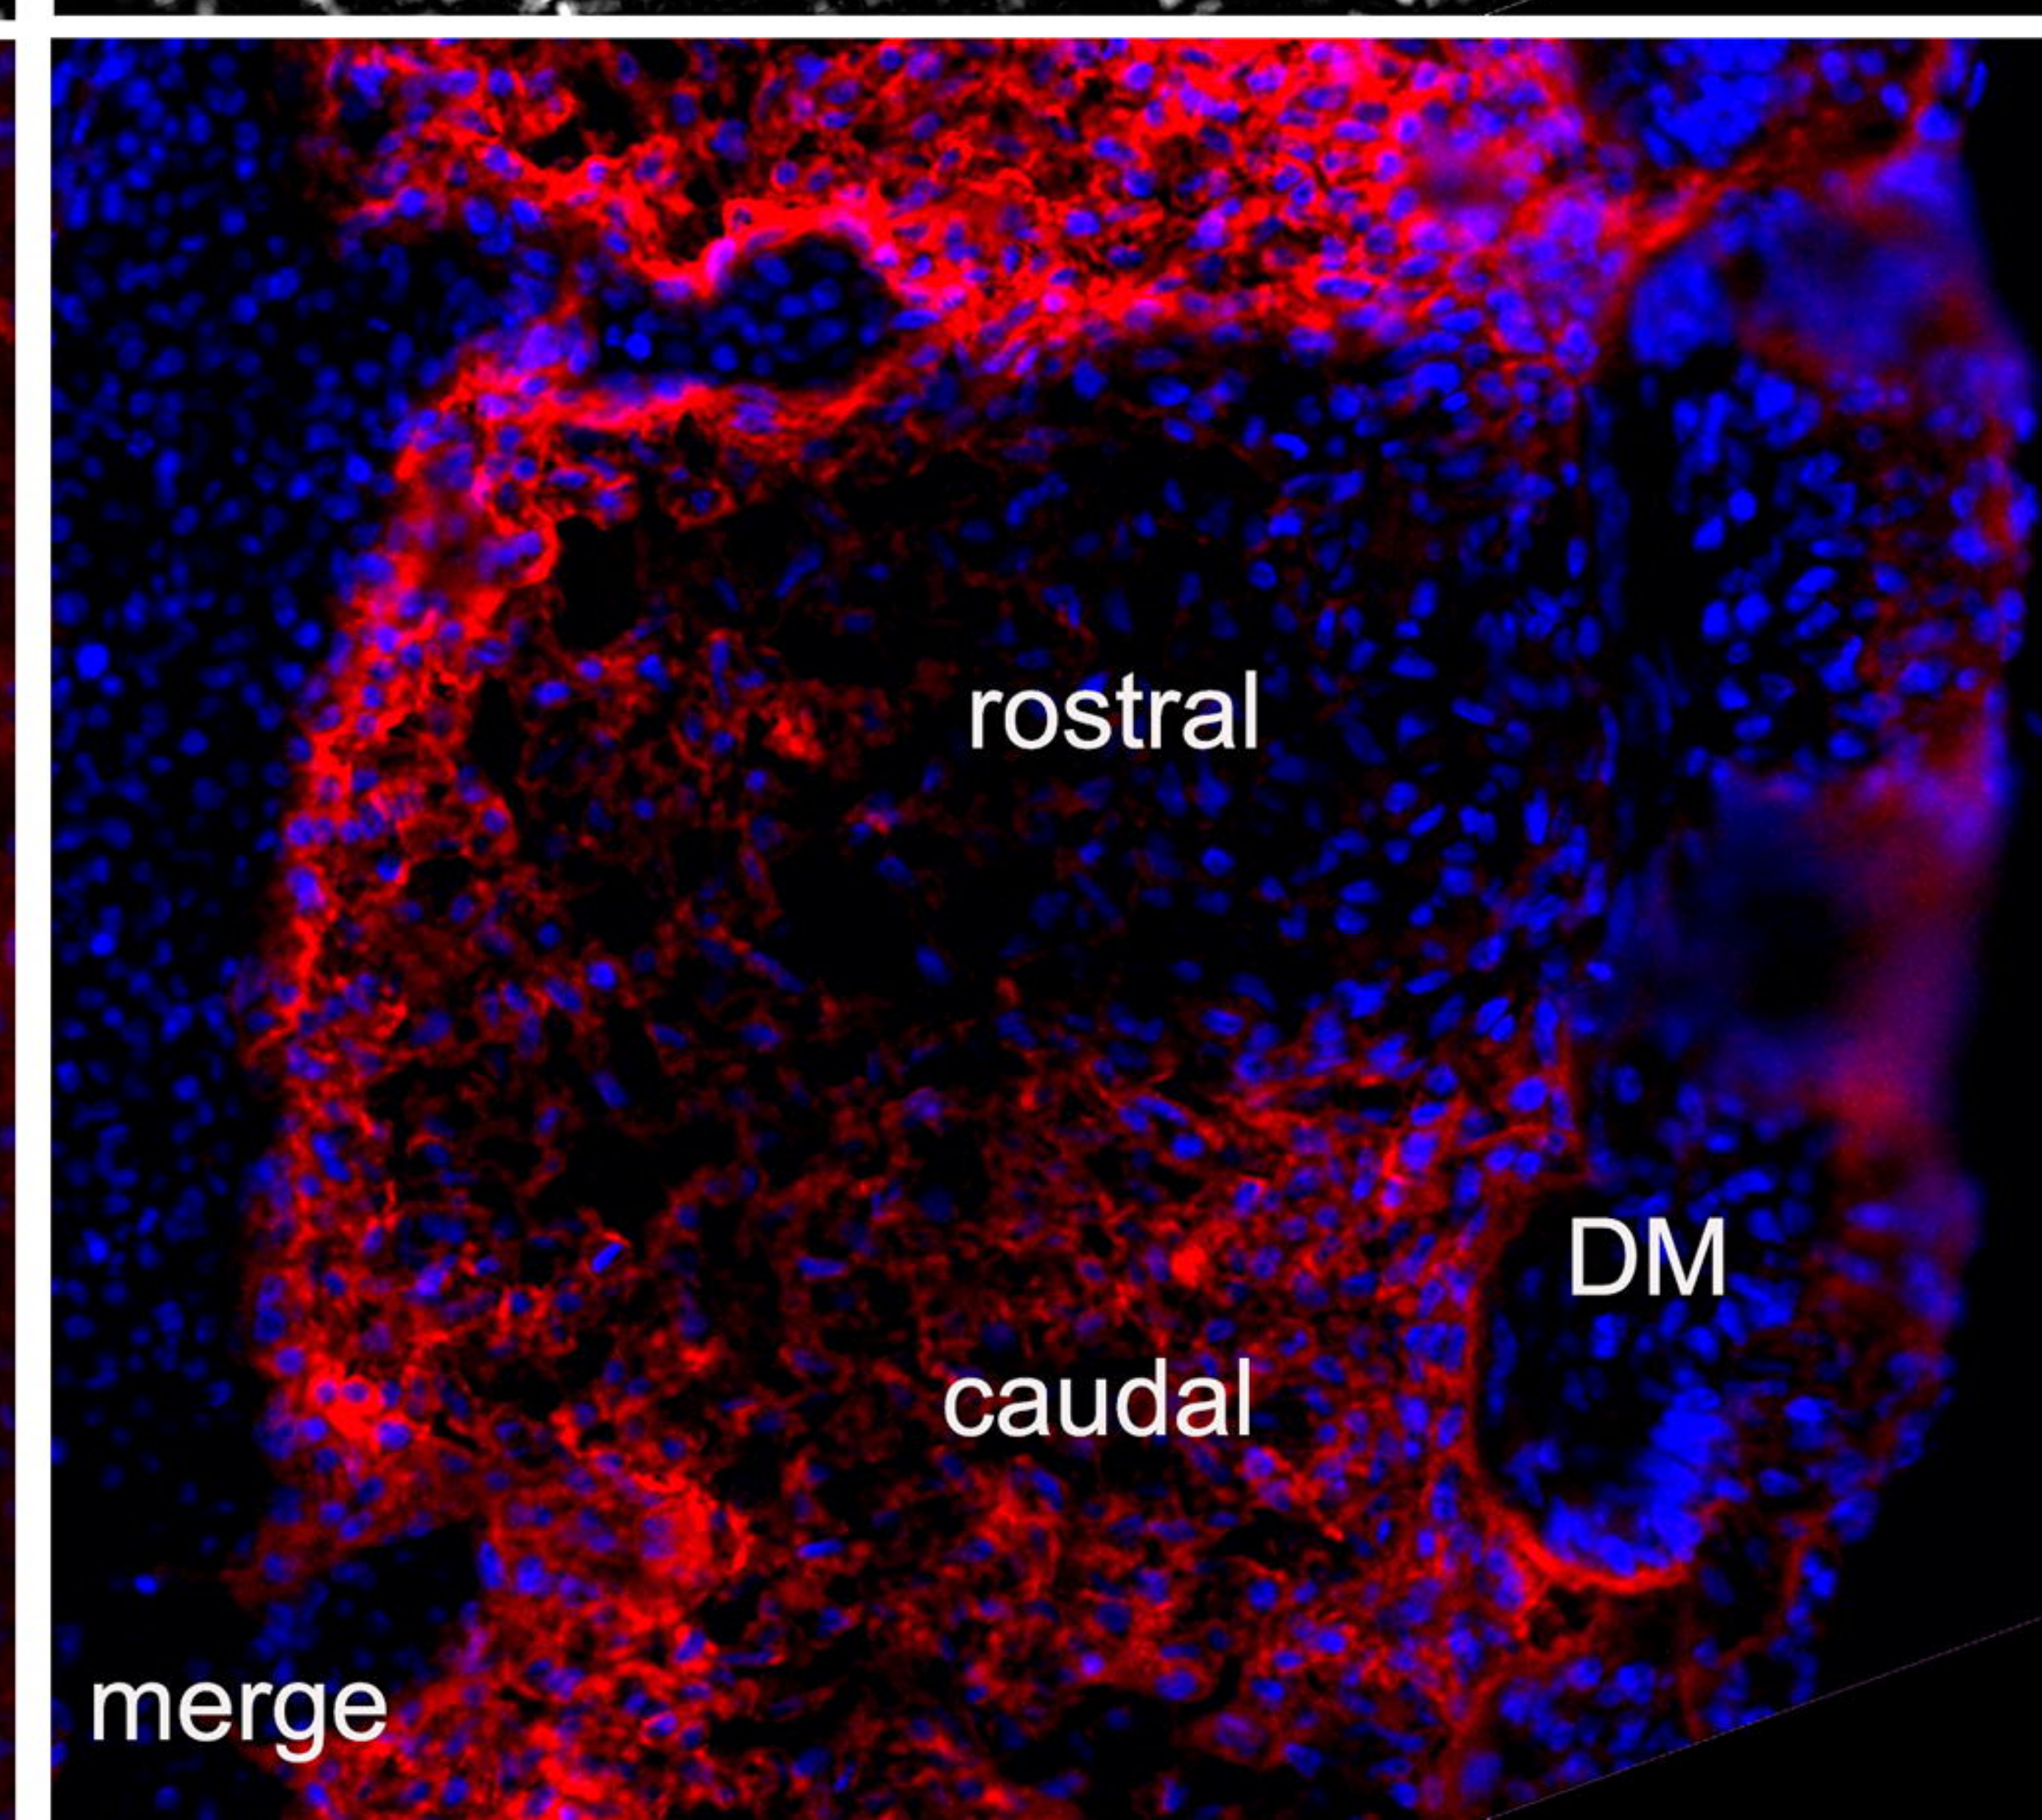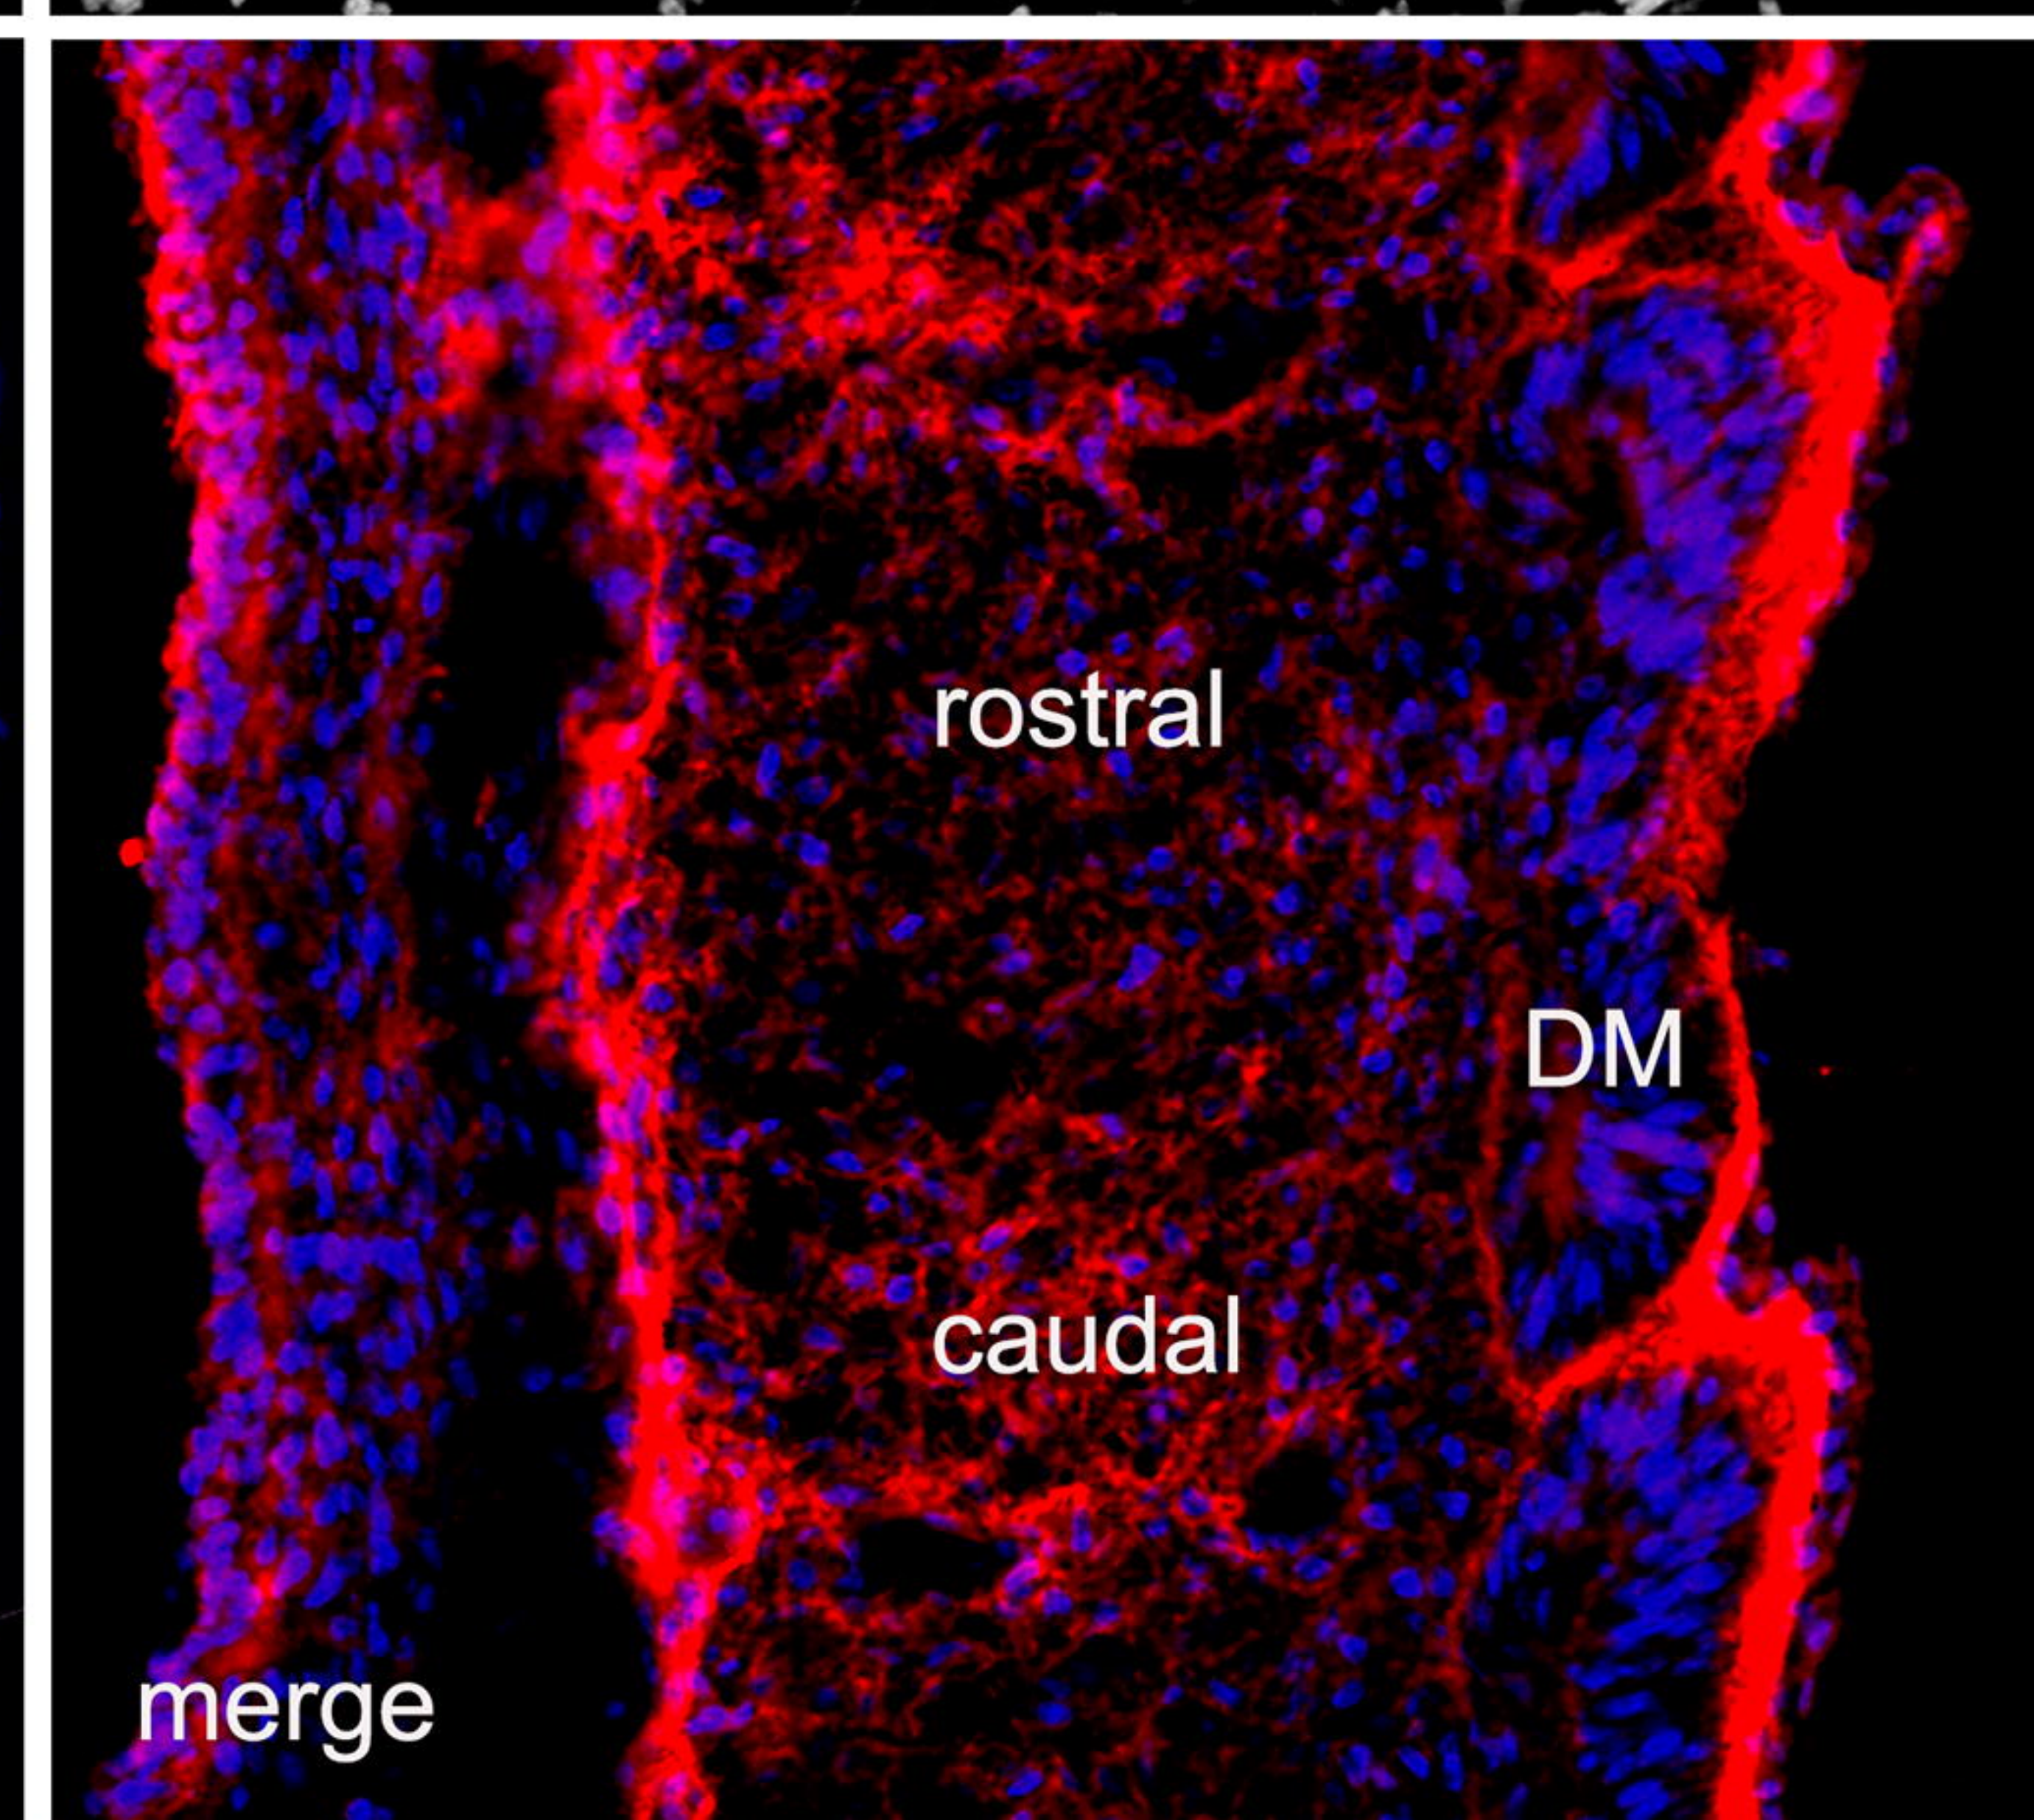



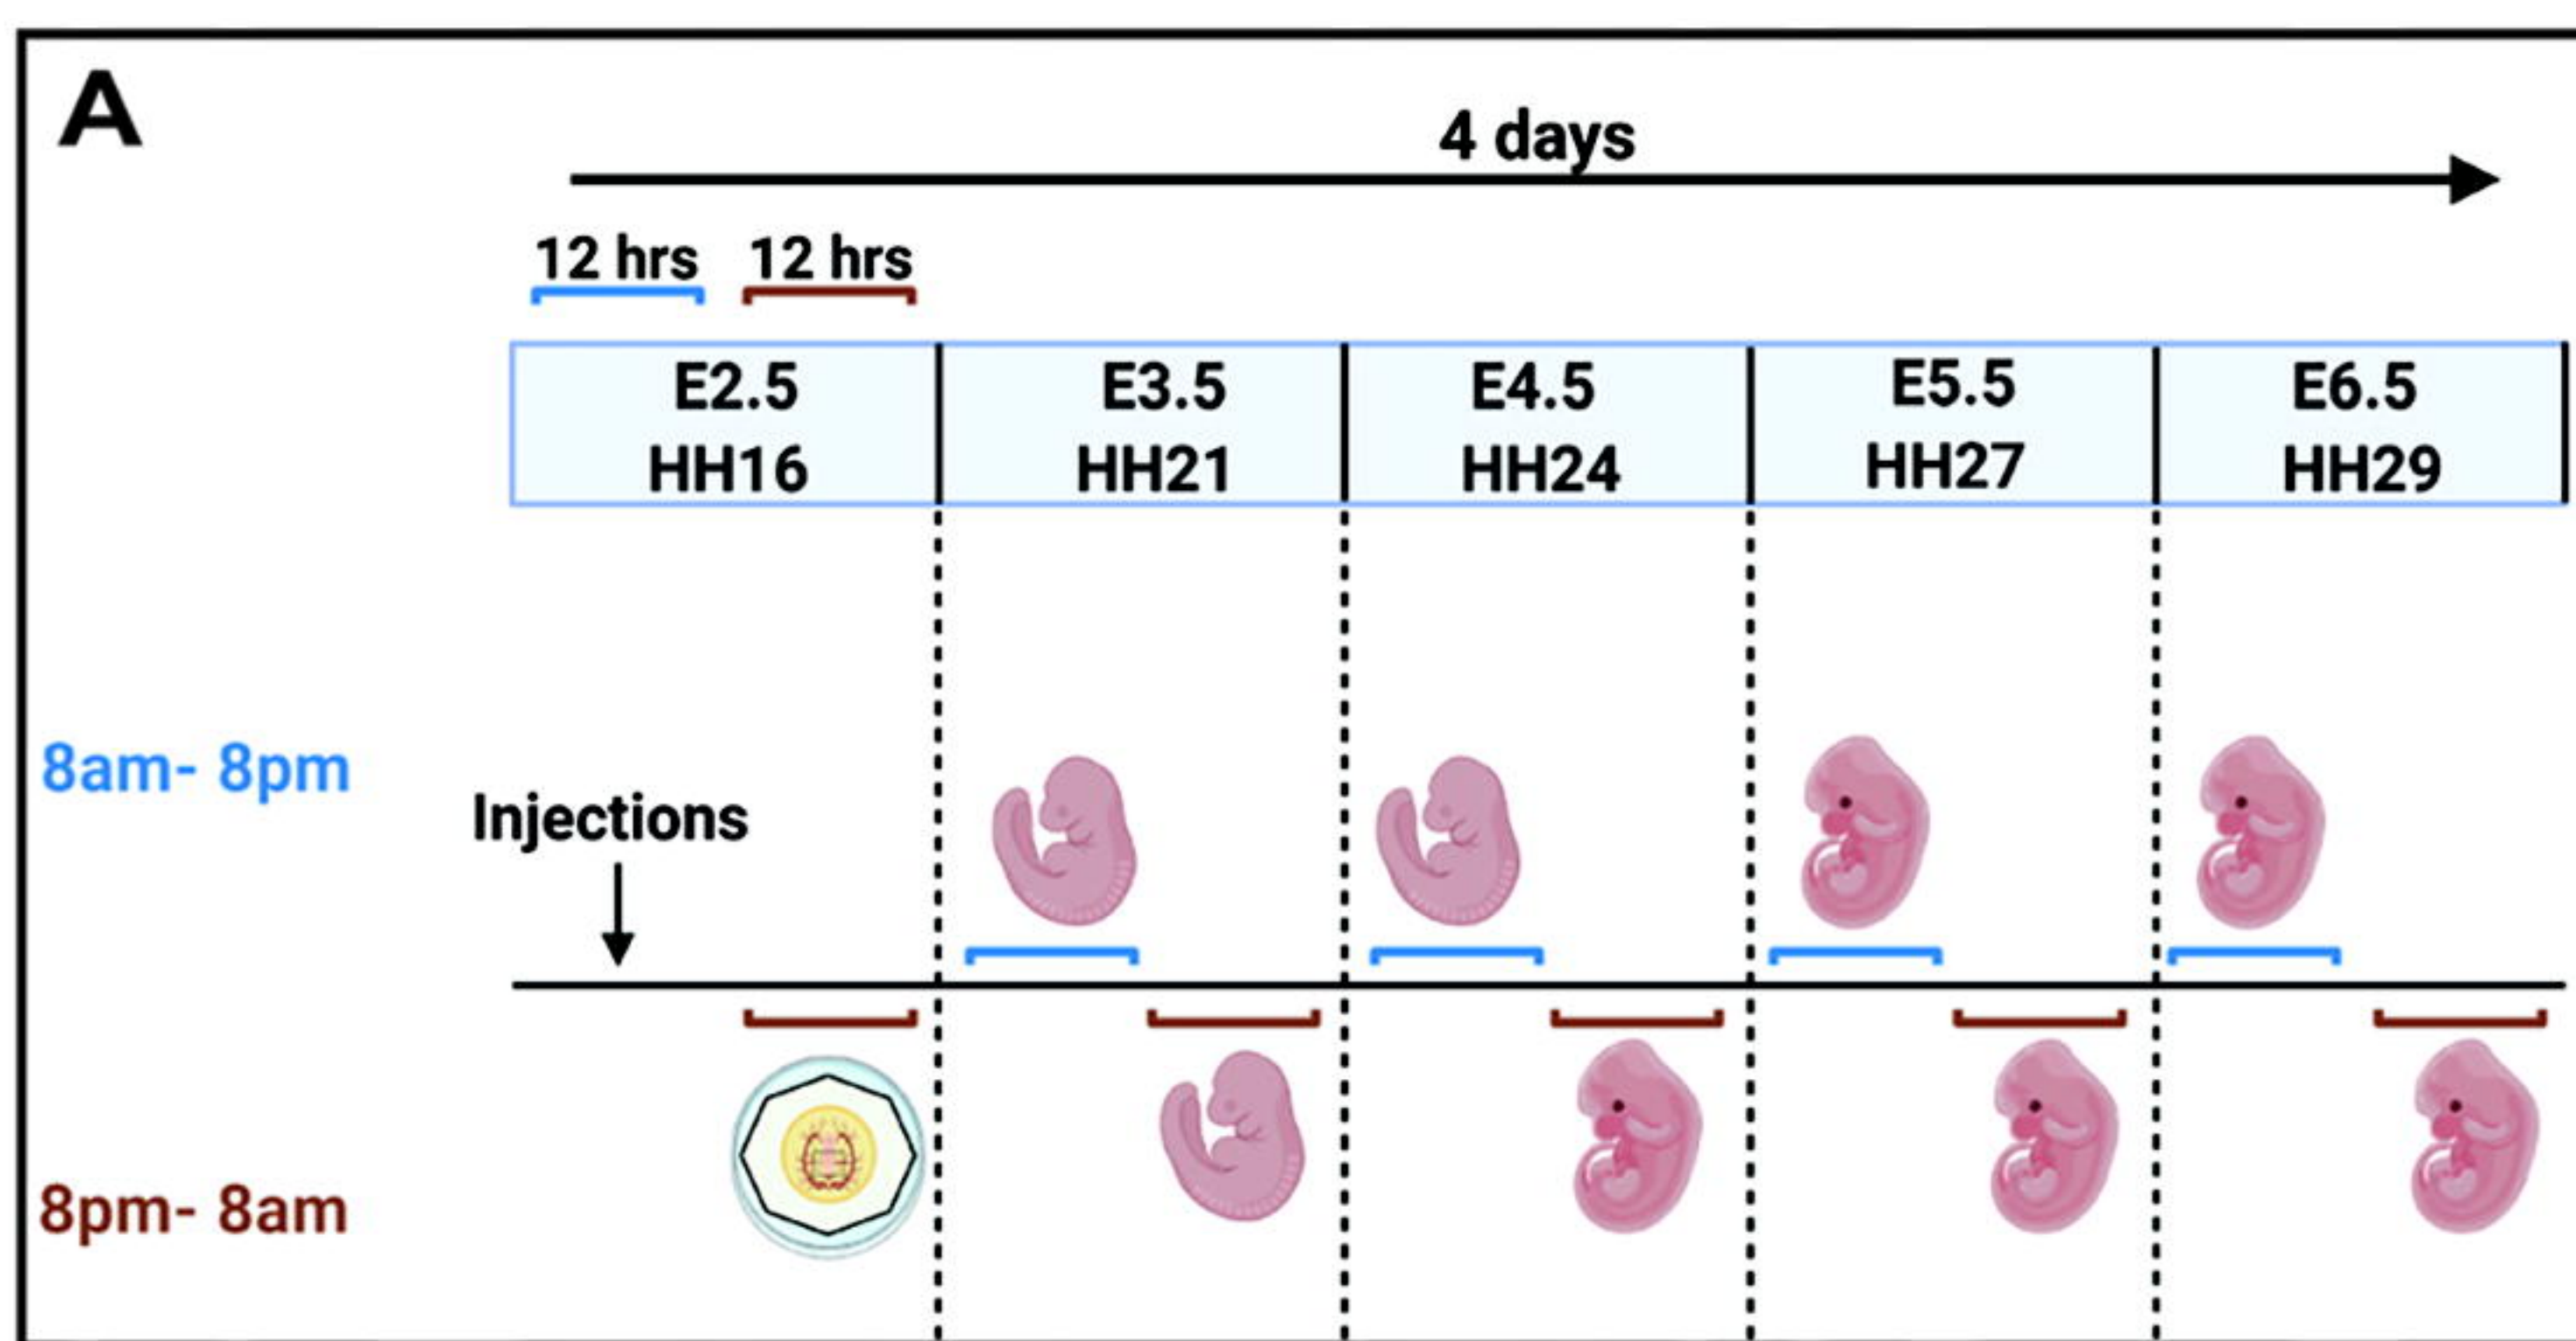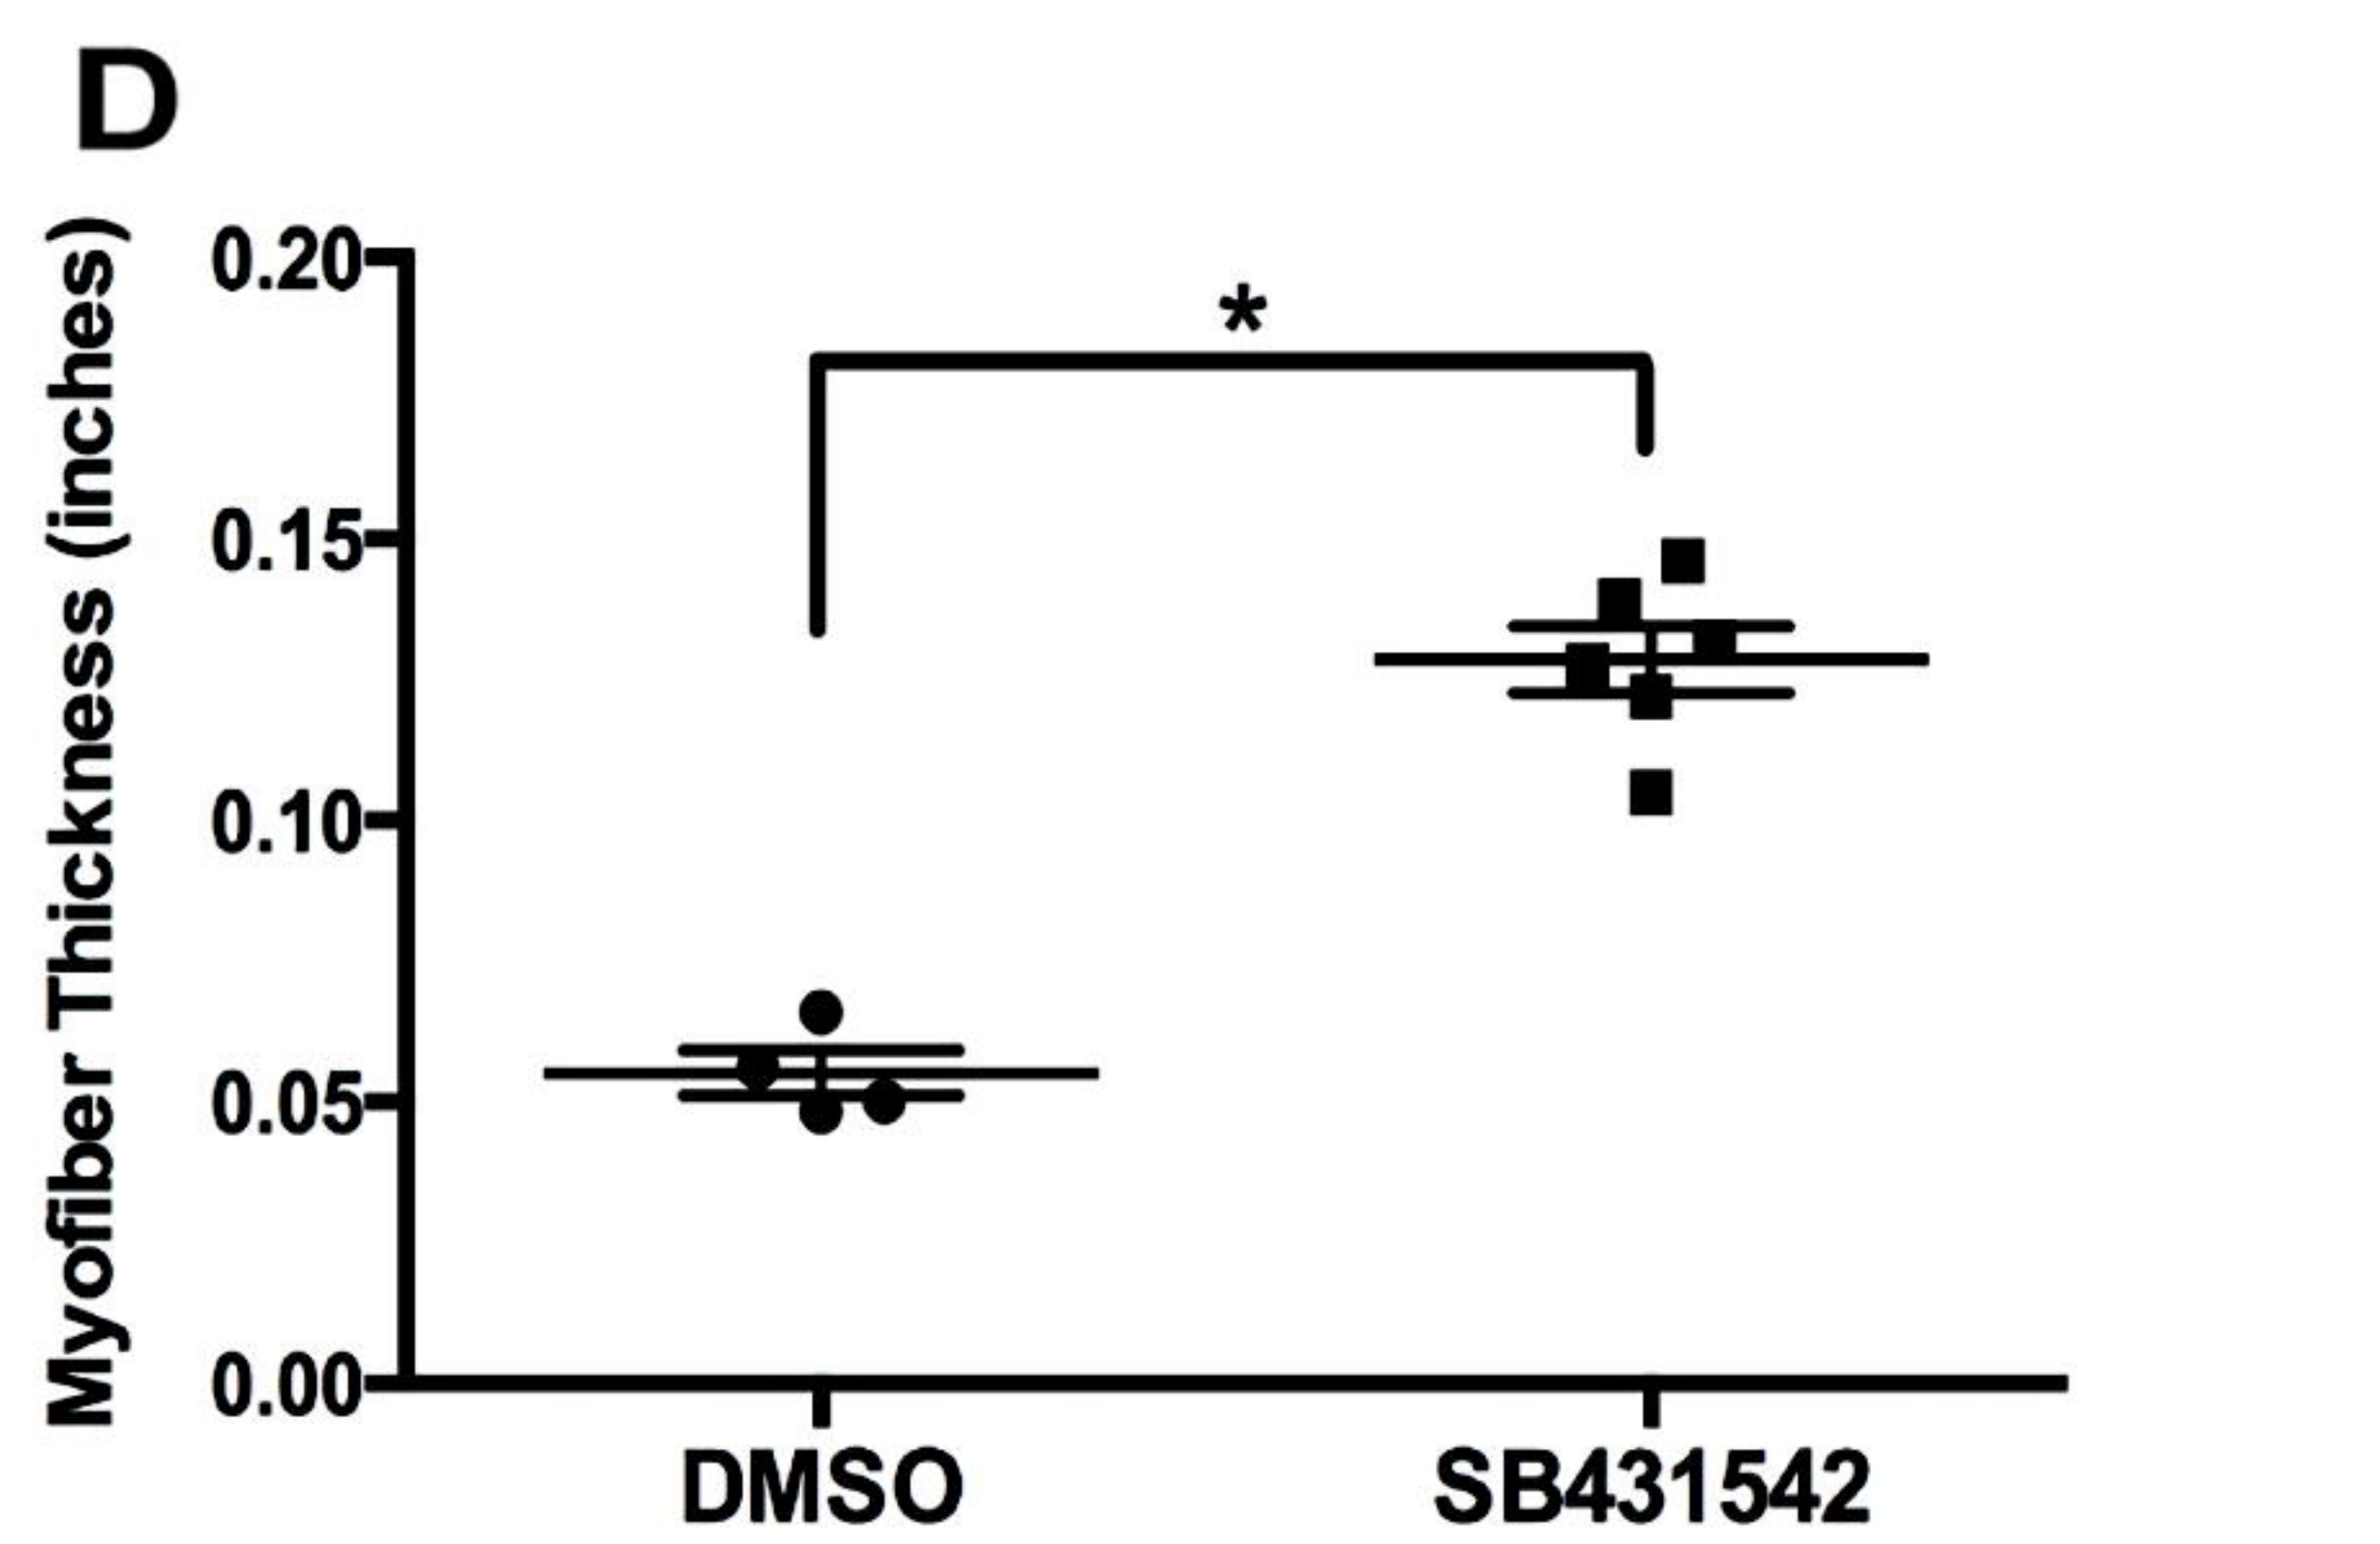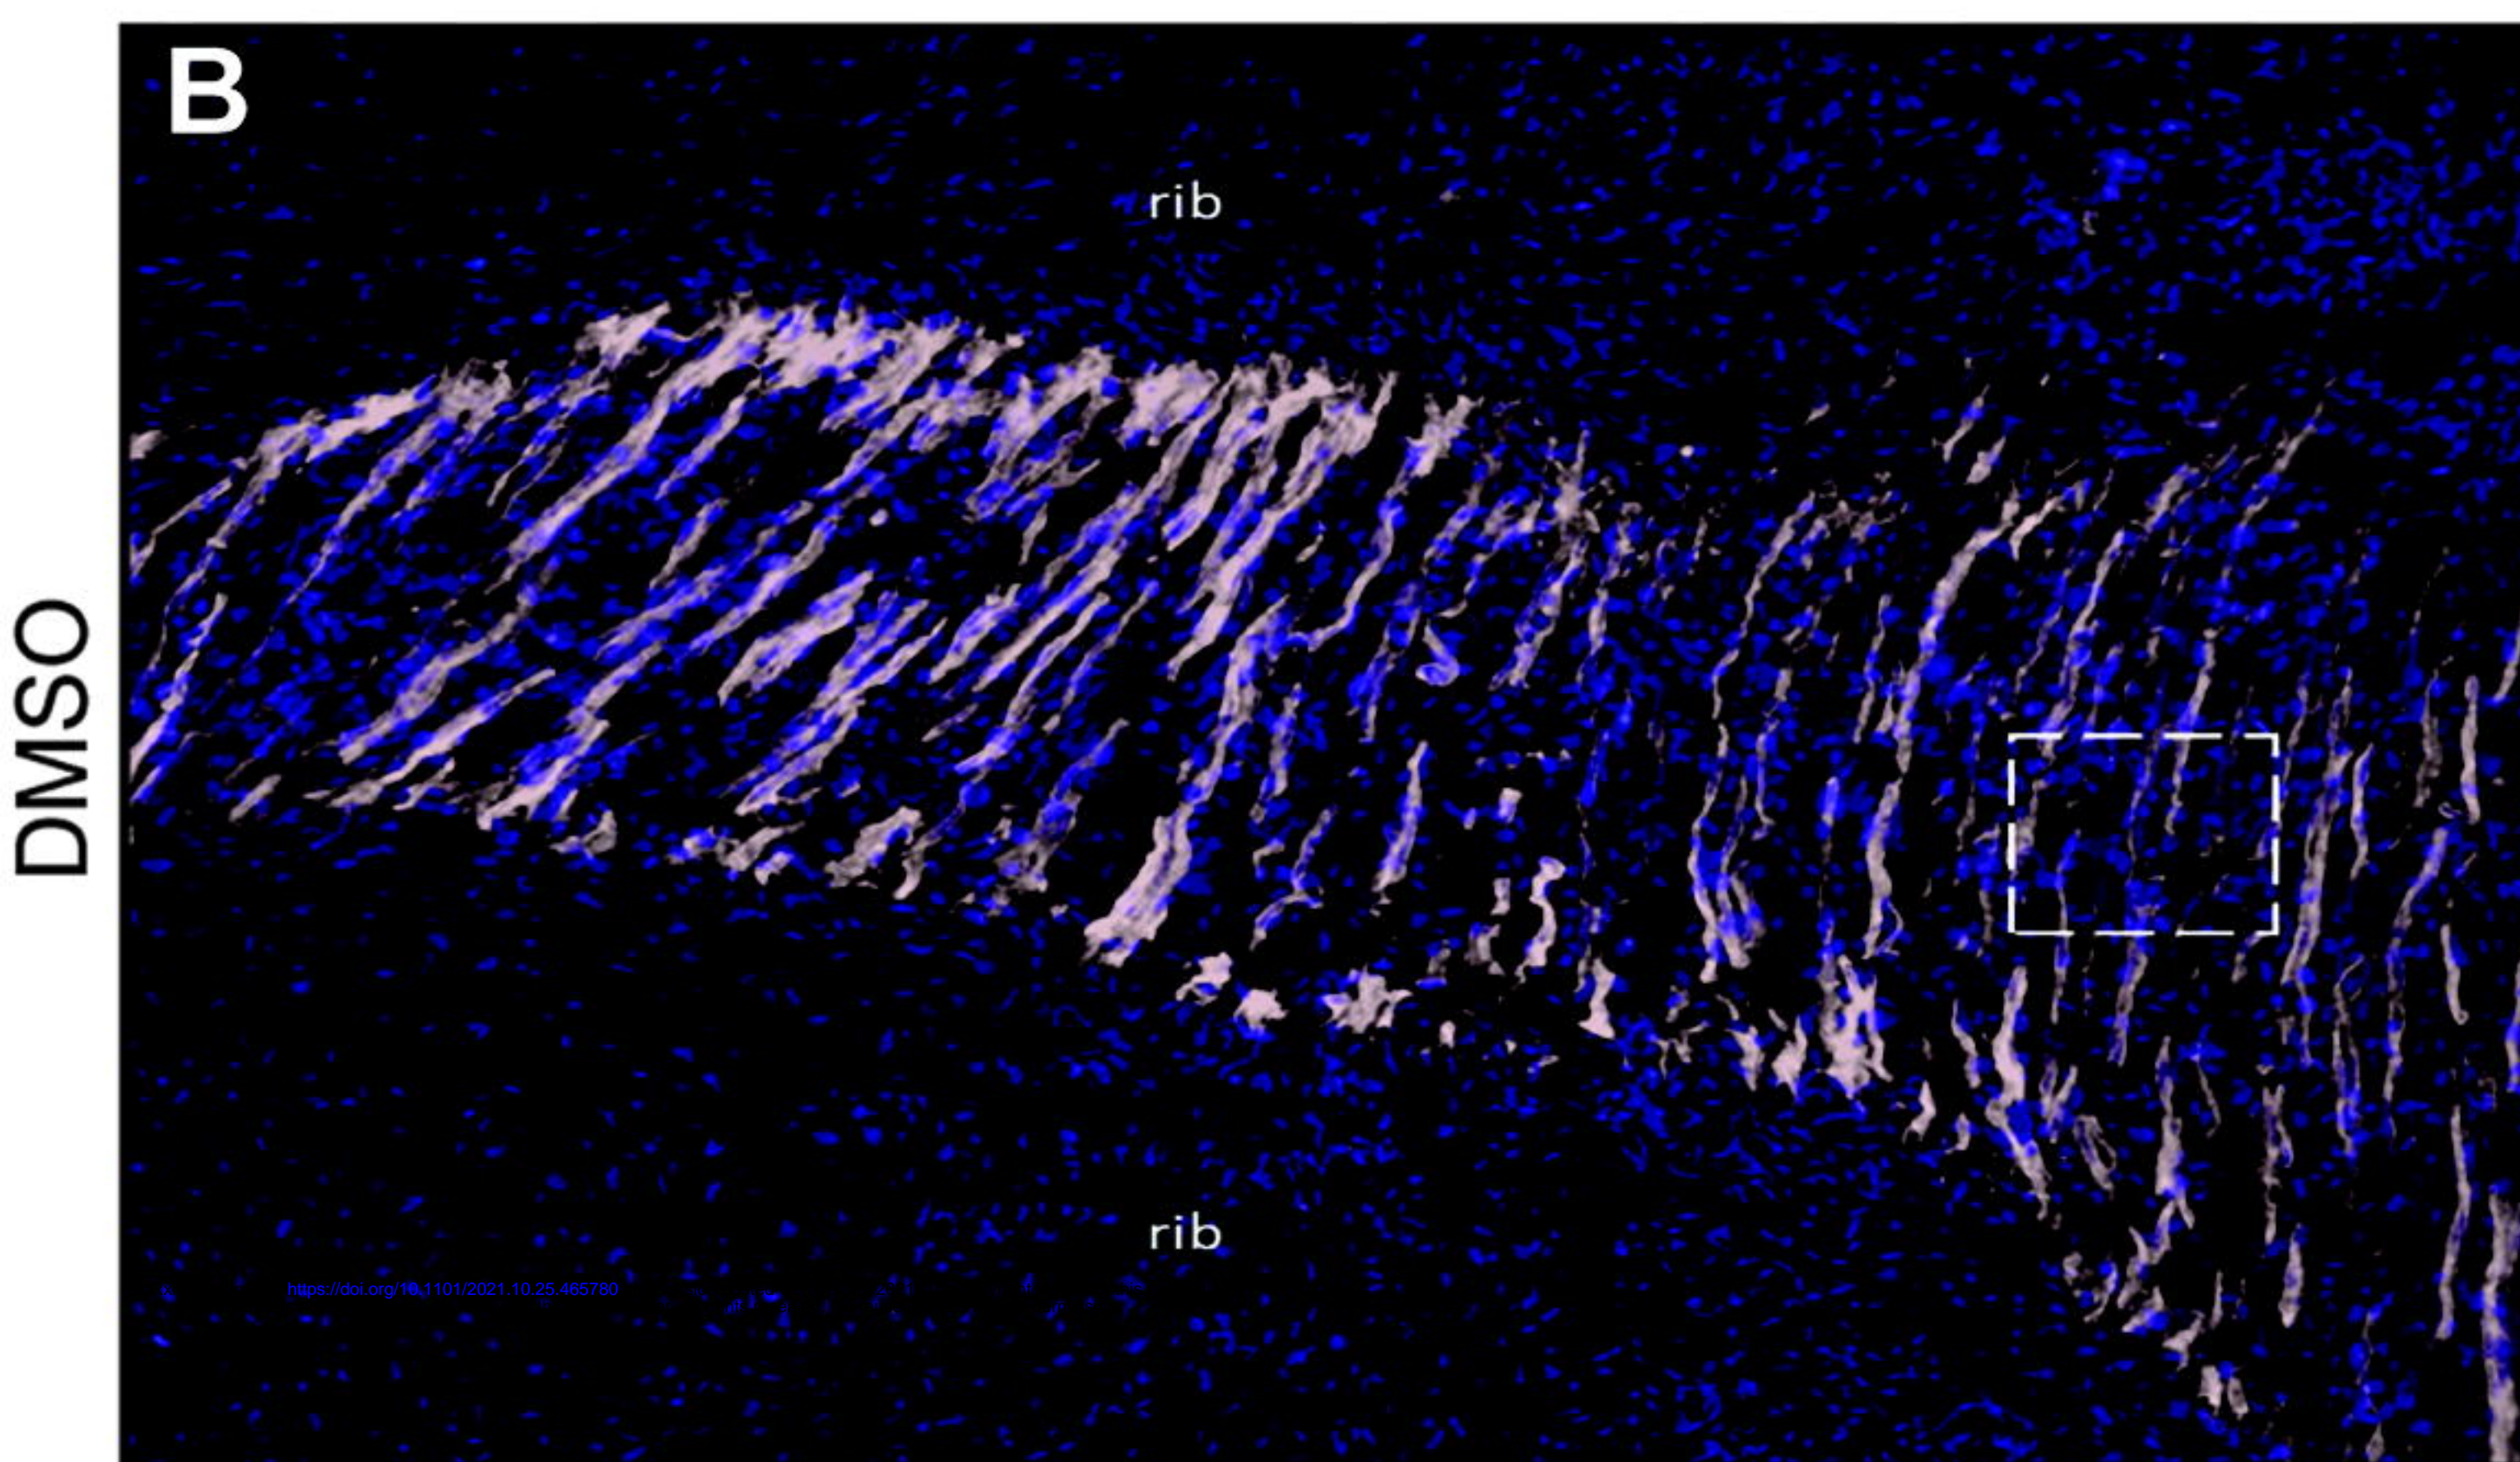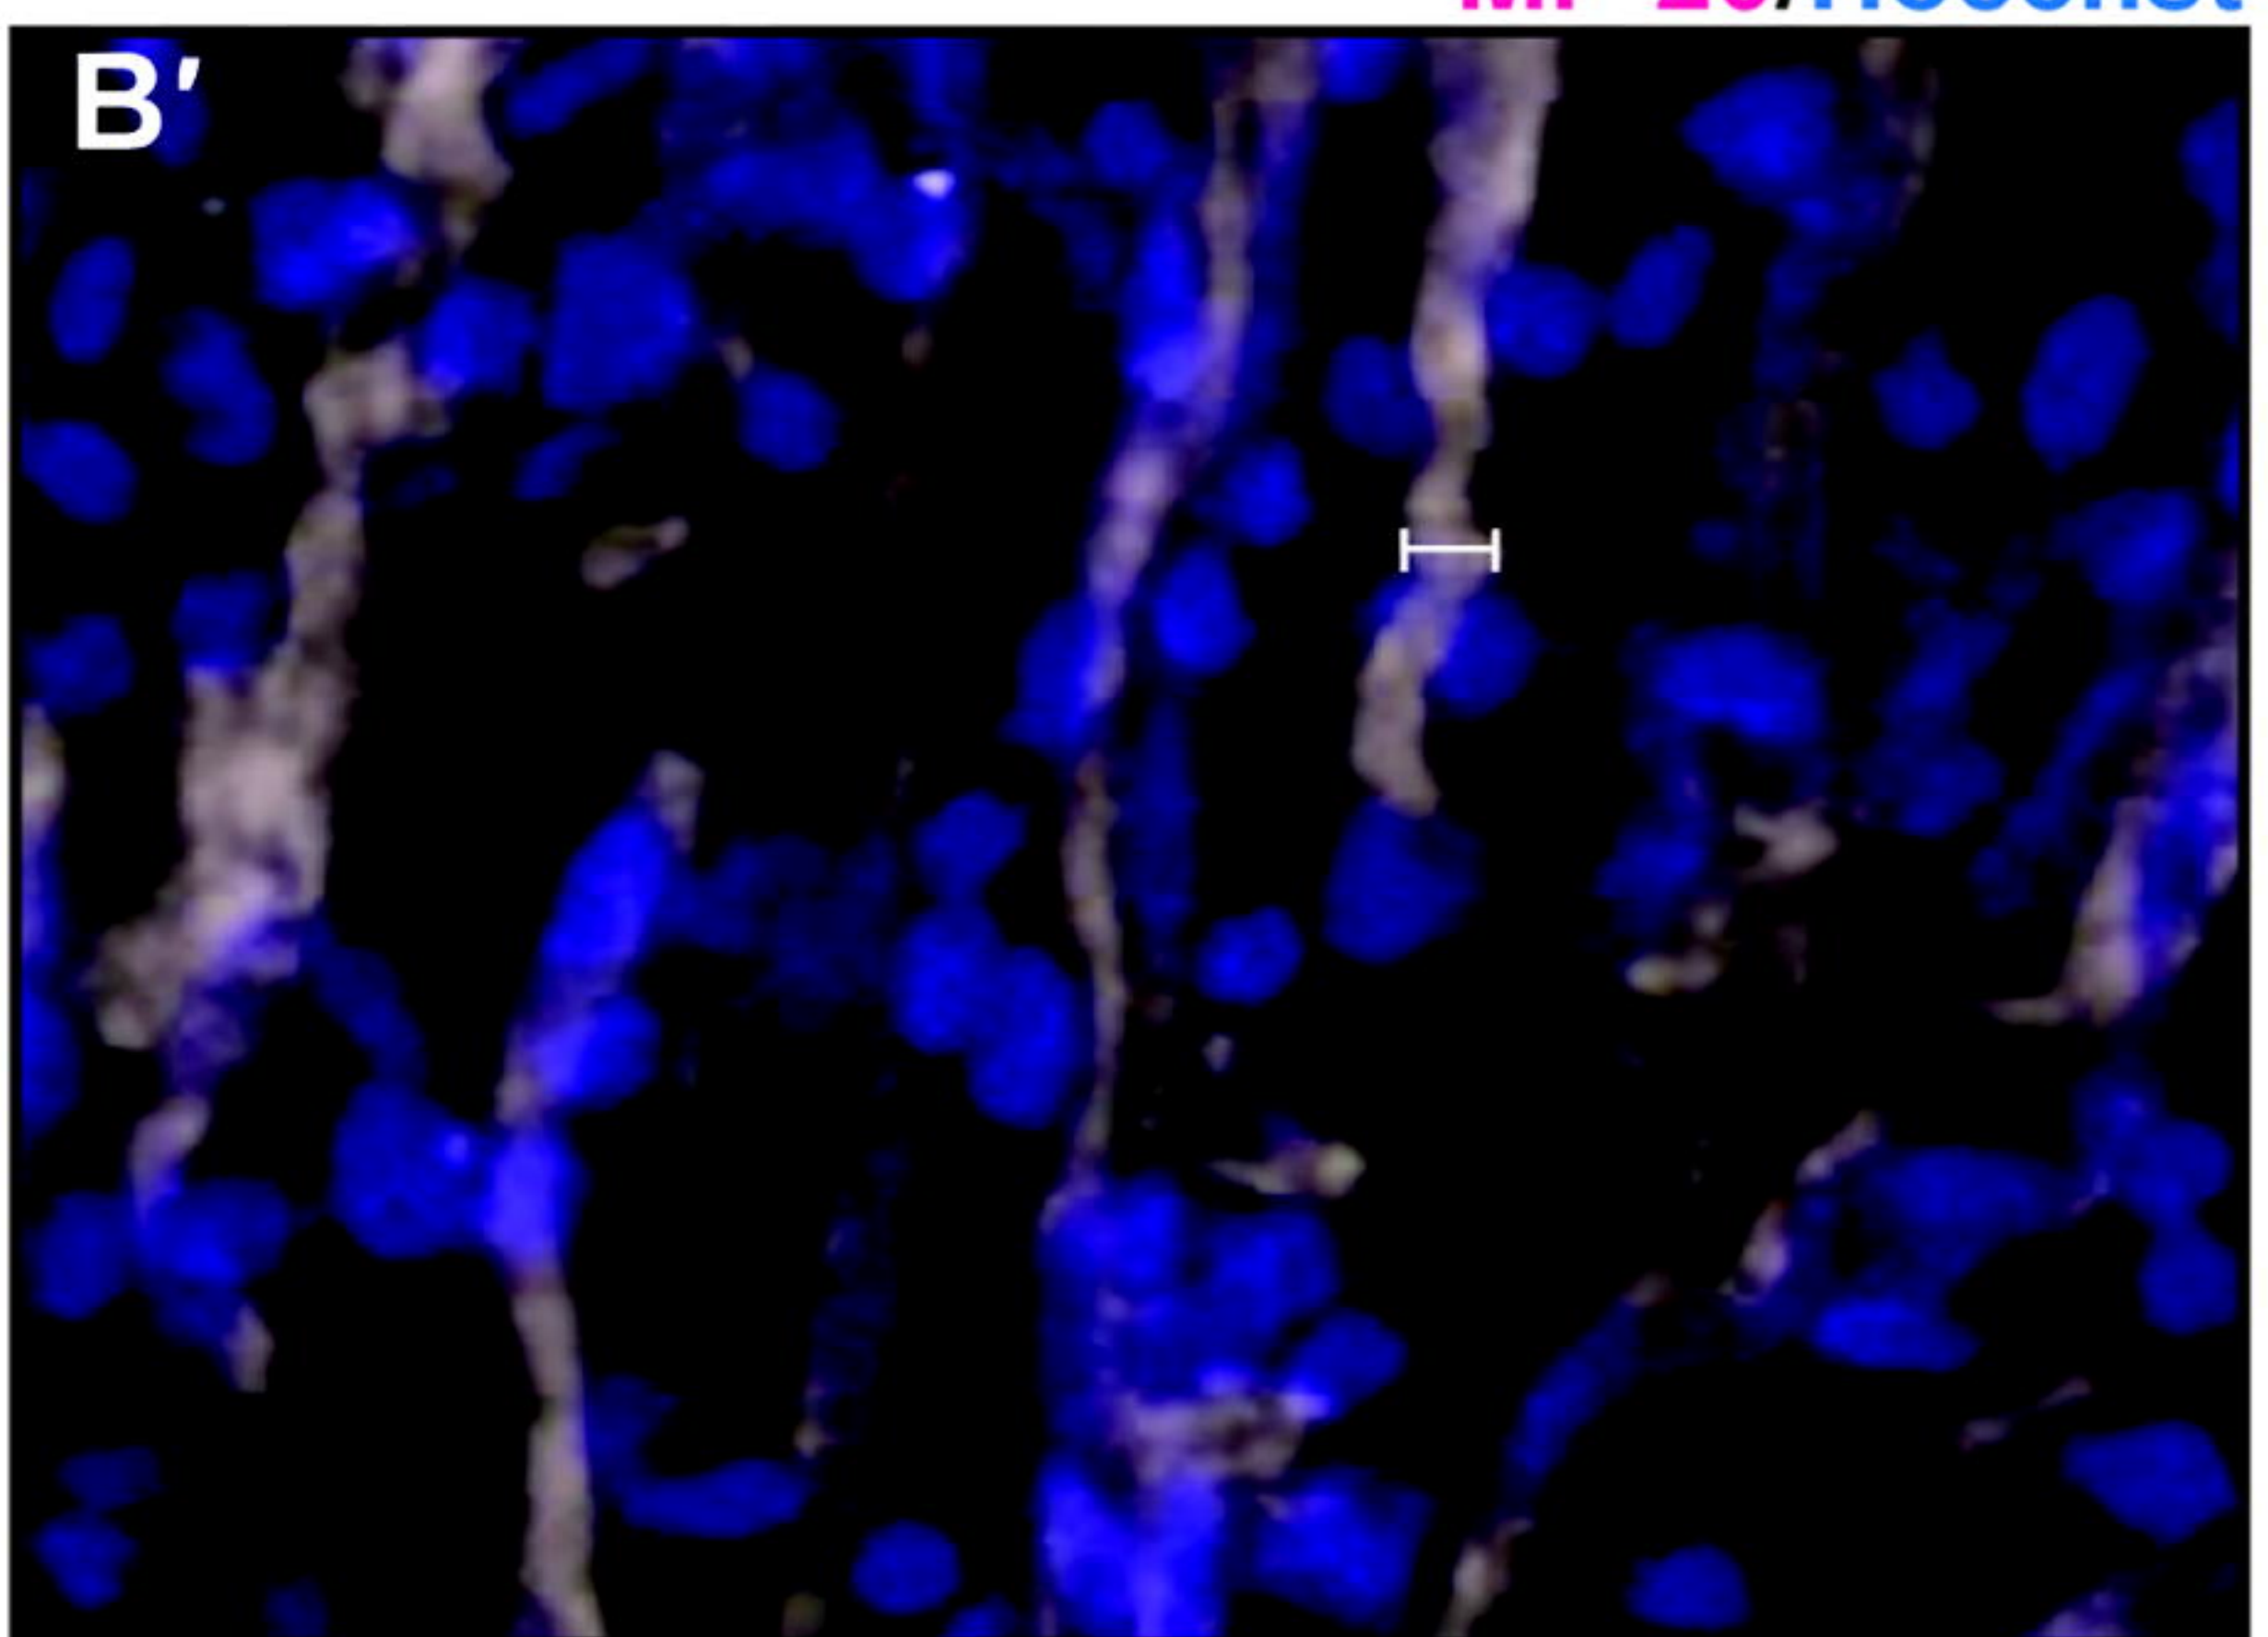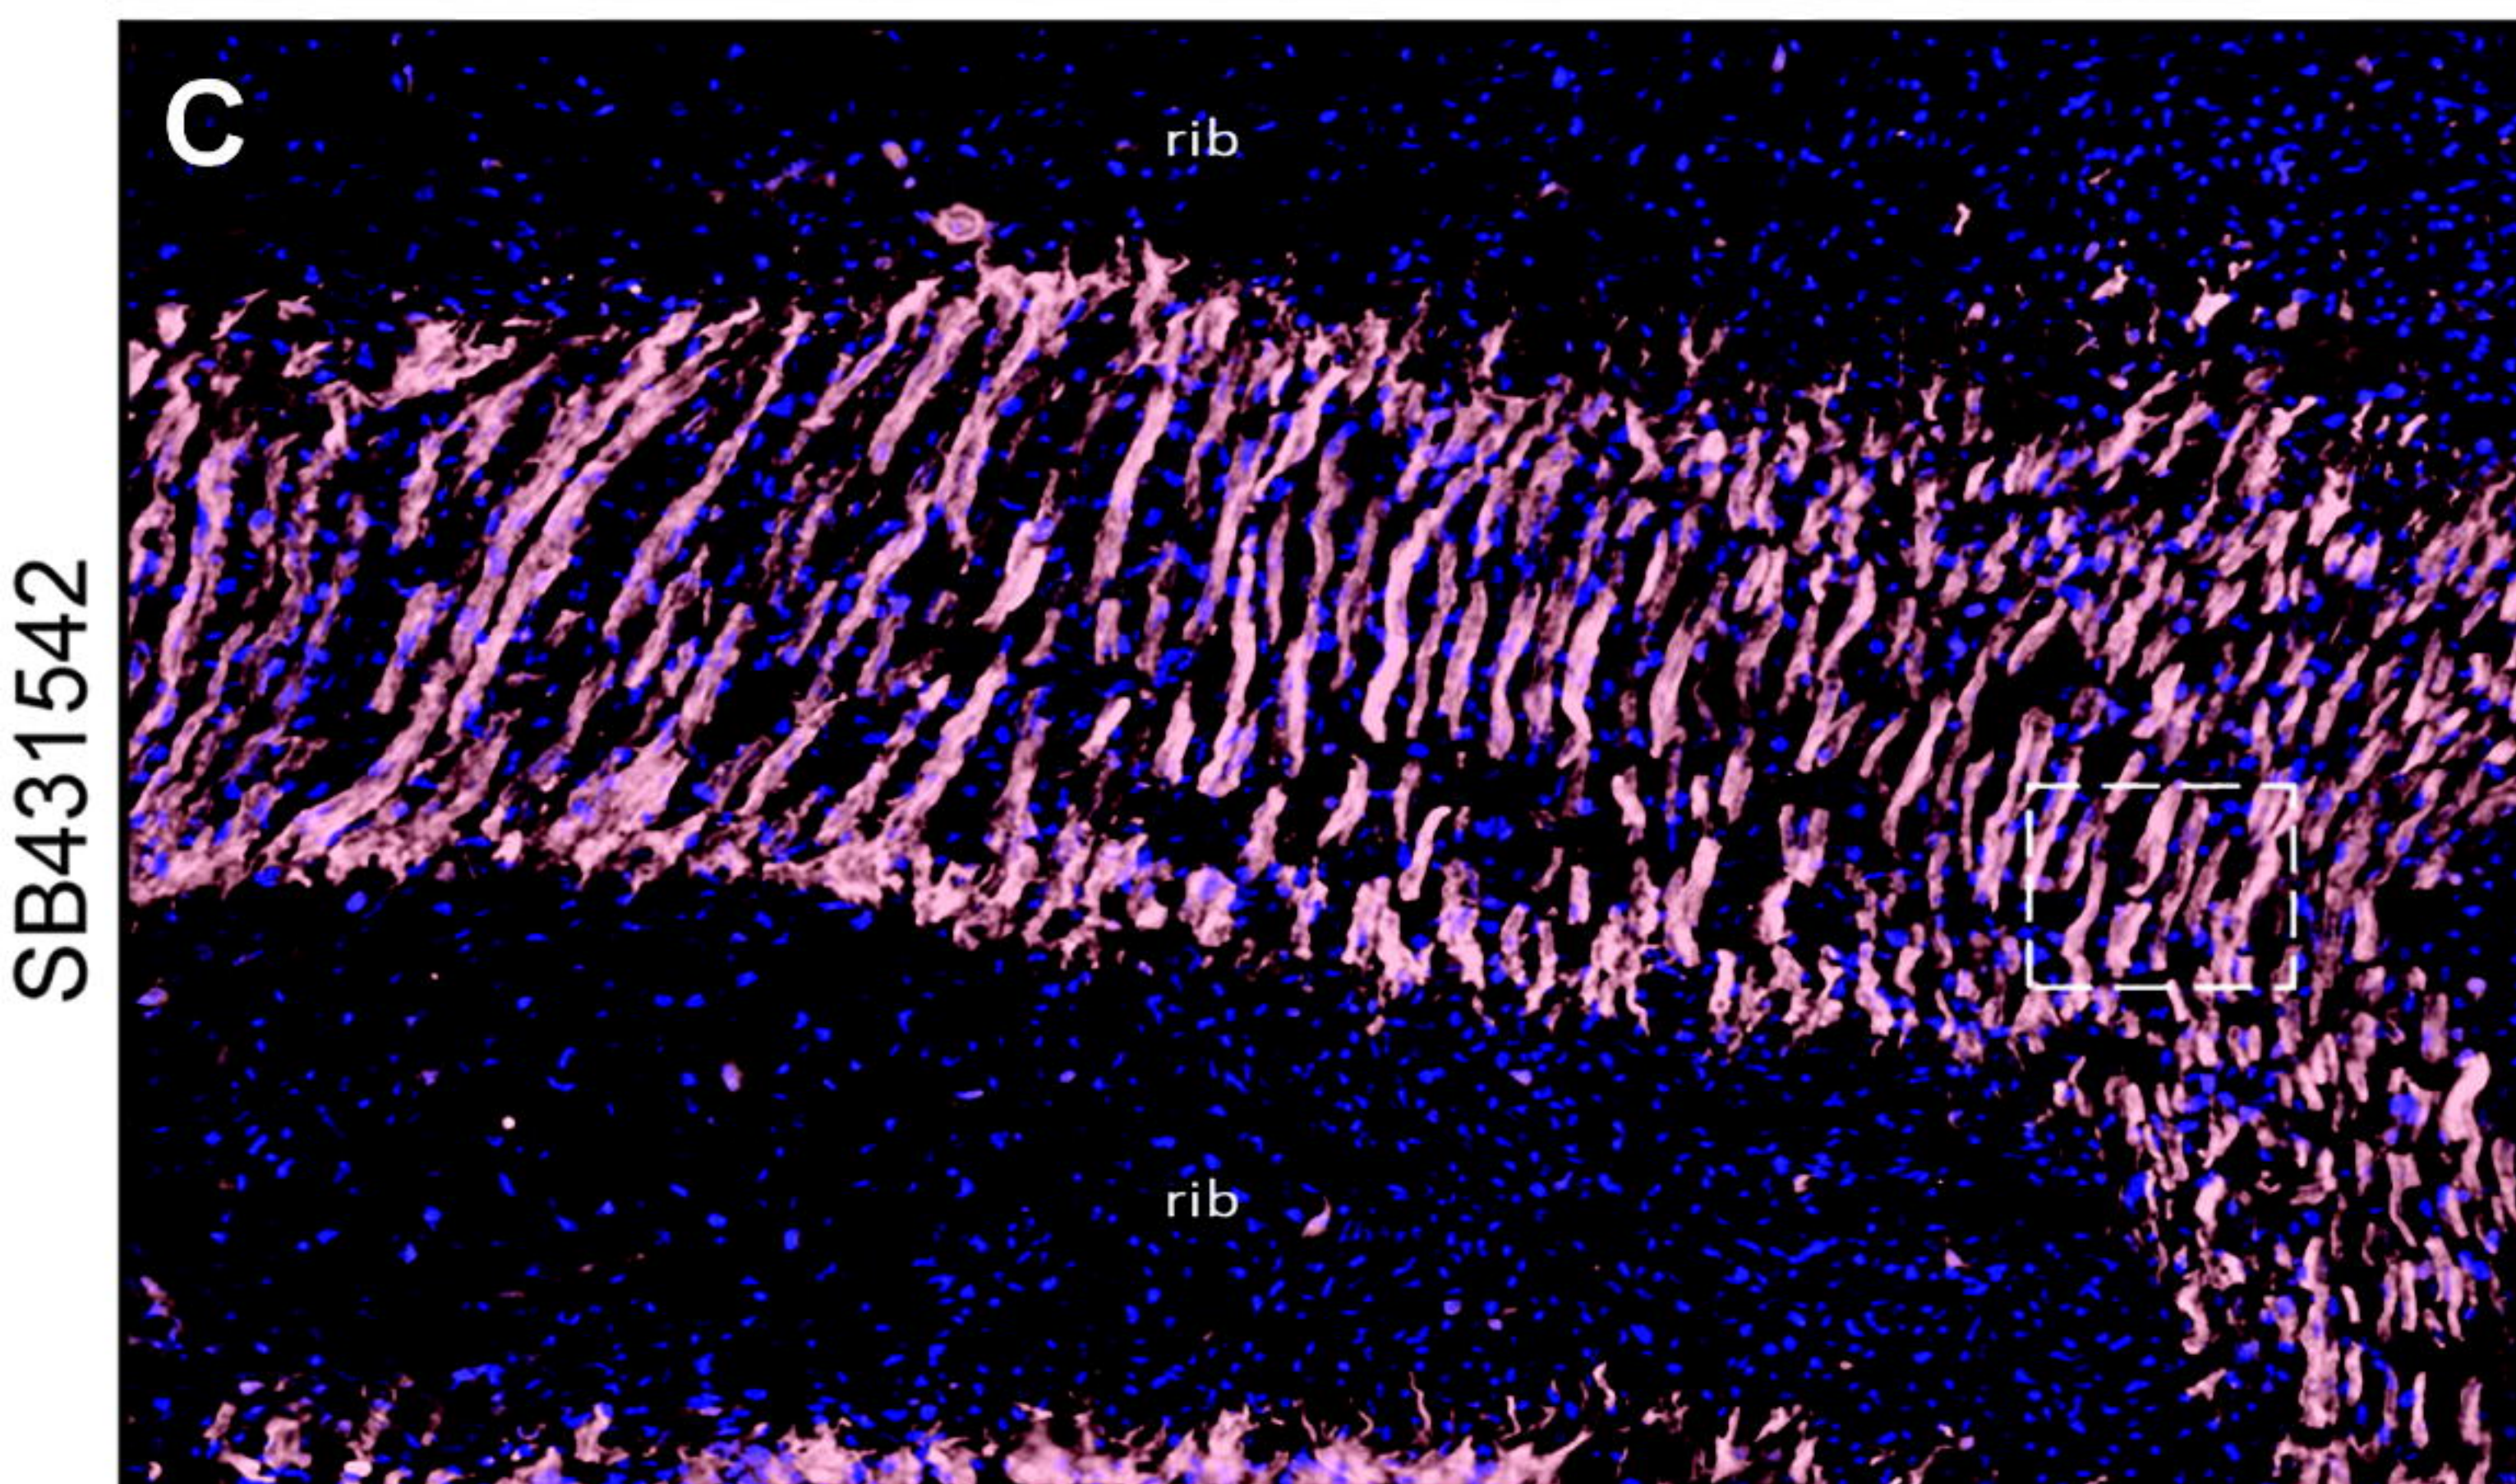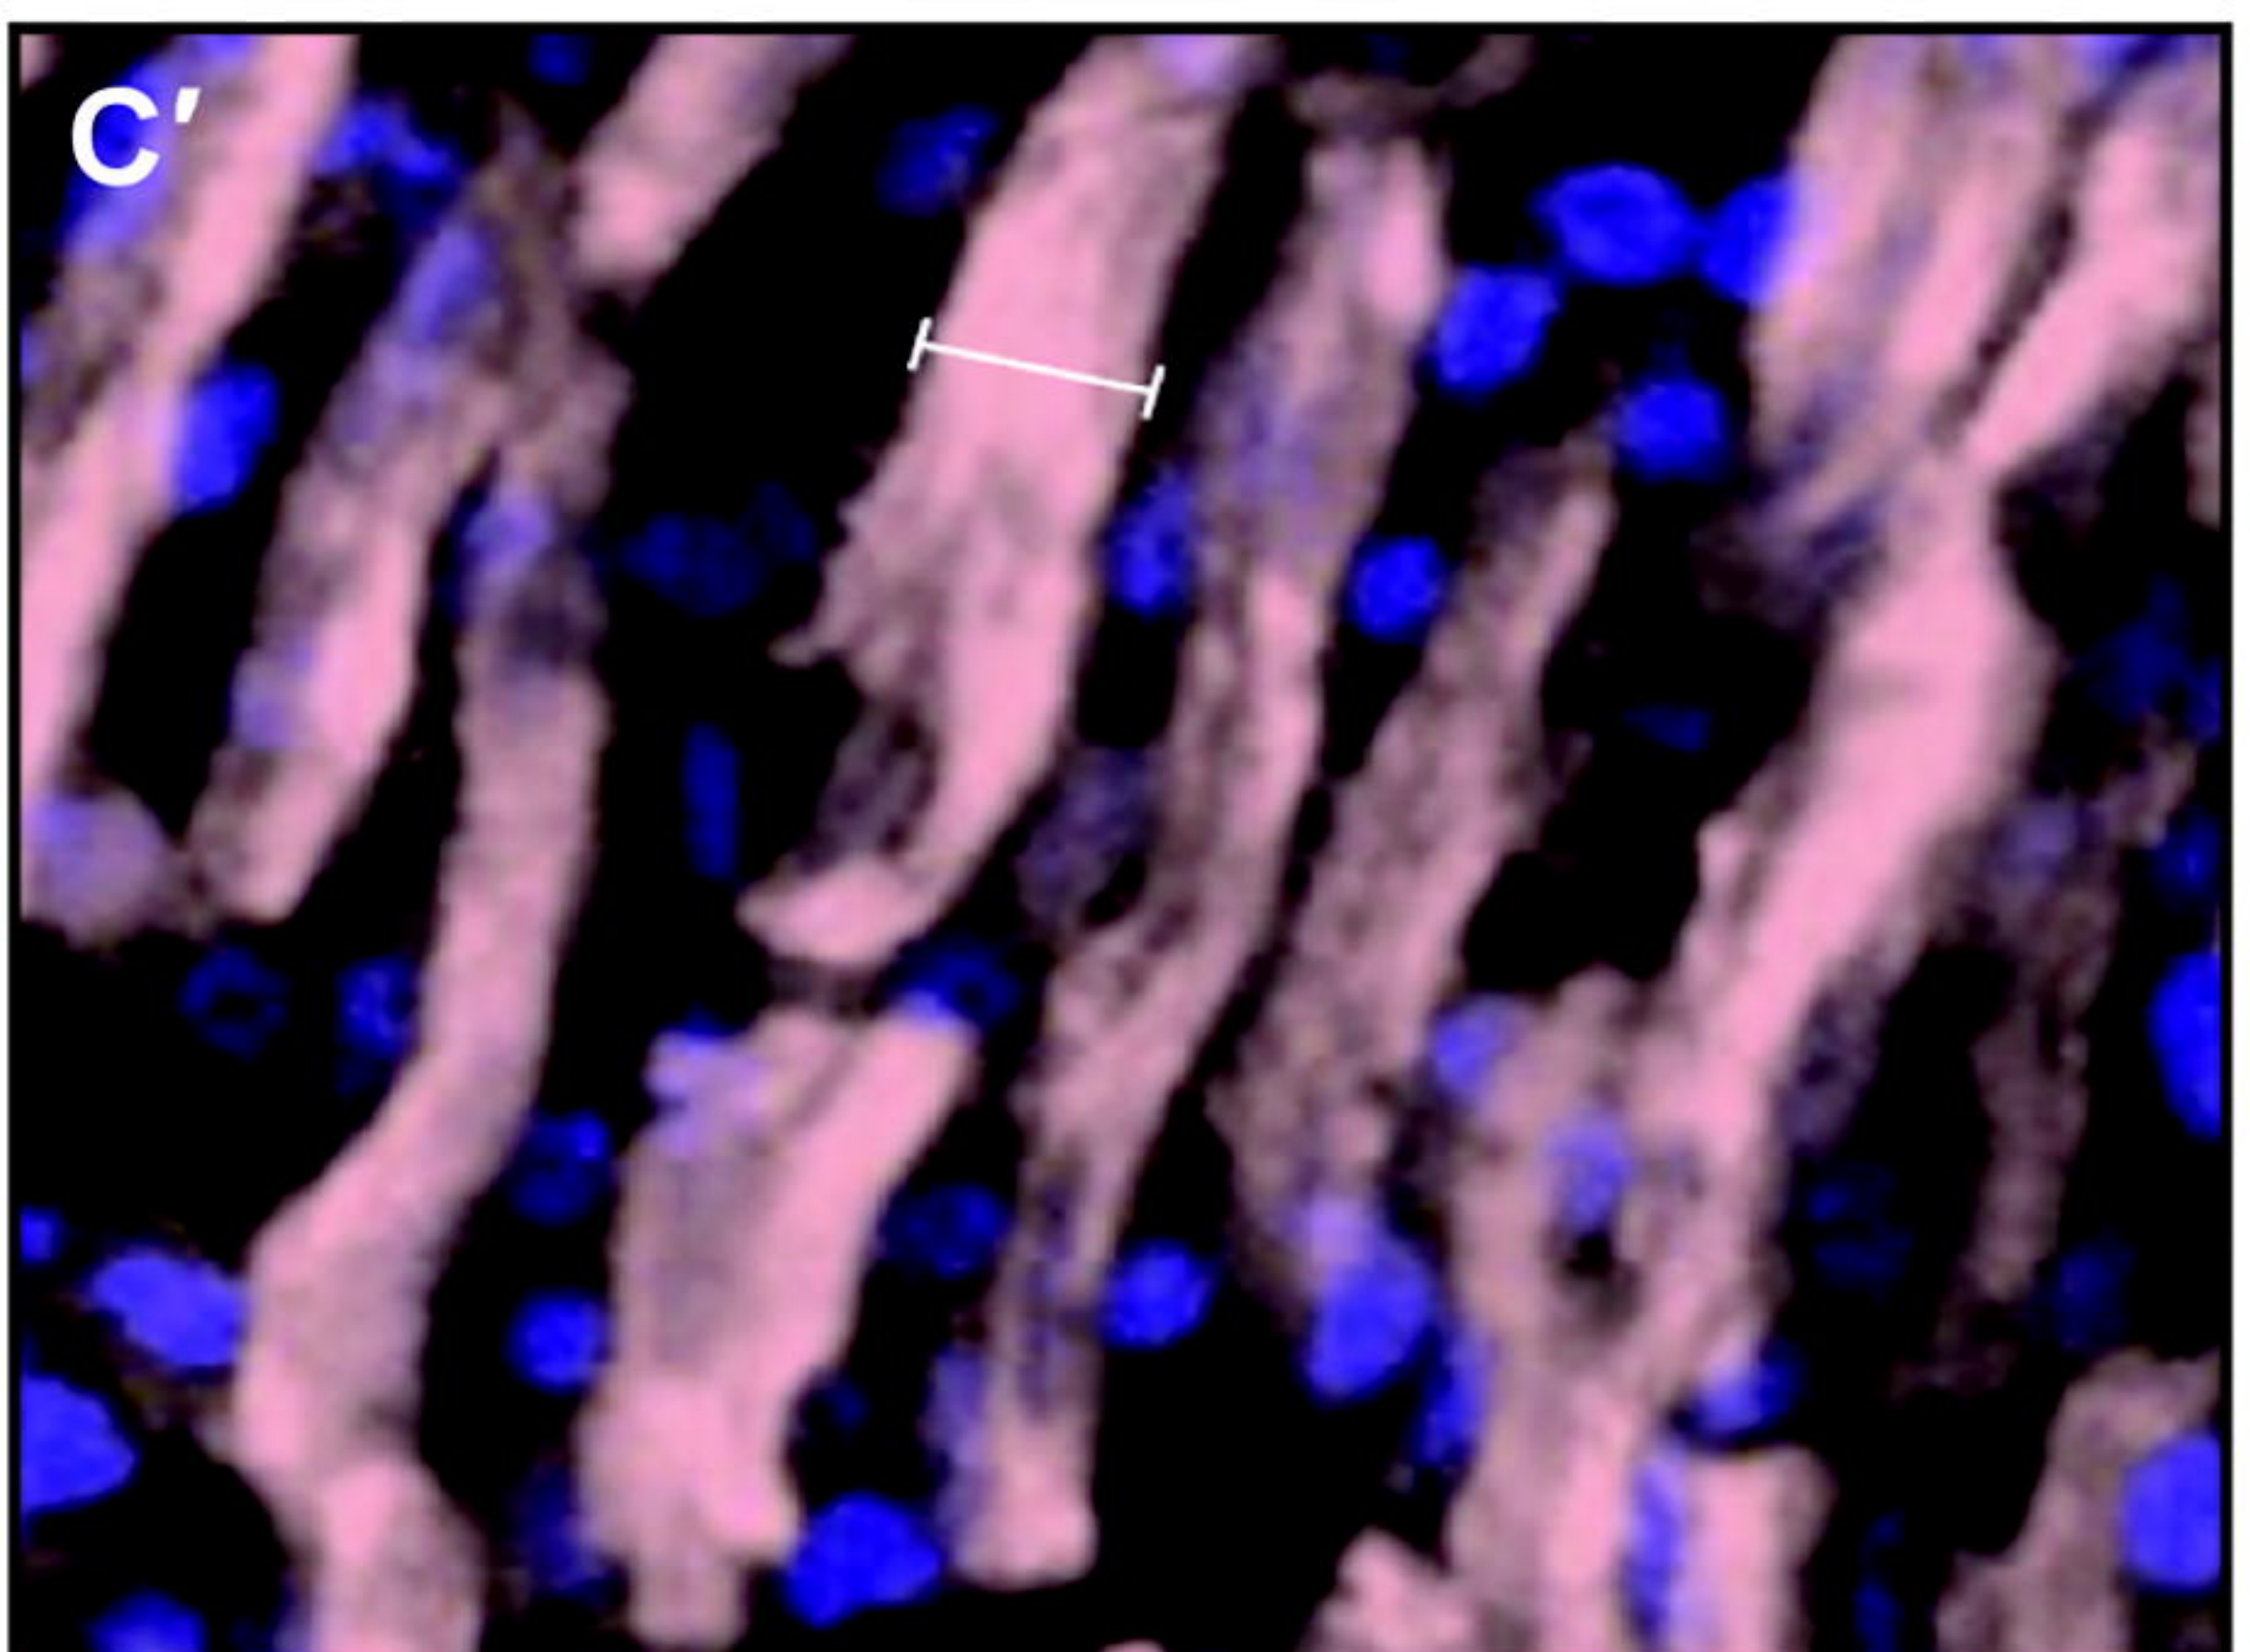

Source: http://biorxiv.org/content/10.1101/2021.10.25.465780v1.full.pdf
